# Supplementary material for: Geodata for the public – best practice examples from GIS and web applications
Source: Copernicus journal article supplement (doi:10.5194/sand-2-239-2023), 2023-09-06
Supplement: Supplementary file 1 [file sand-2-239-2023-supplement.zip]

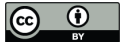

## *Supplement of*

# **Geodata for the public – best practice examples from GIS and web applications**

**Ute Maurer-Rurack and Maik Schilling**

*Correspondence to:* Ute Maurer-Rurack ([ute.maurer-rurack@base.bund.de](mailto:ute.maurer-rurack@base.bund.de))

- sand-2-239-2023-supplement-title-page.pdf
- sand-2023-96\_2023-09-13\_WS-07\_Nuclear\_Power\_in\_Europe\_SKD\_final.pdf
- sand-2023-96\_2023-09-13\_WS-07\_Promoting-Stakeholder-Participation\_Nagra.pdf
- sand-2023-96\_2023-09-13\_WS-07\_Radiation-exposure-in-the-Chernobyl-area\_BfS.pdf

The copyright of individual parts of the supplement might differ from the article licence.
