# Supplementary material for: Geodata for the public – best practice examples from GIS and web applications
Source: Copernicus journal article supplement (doi:10.5194/sand-2-239-2023), 2023-09-06
Supplement: Supplementary file 2 [file sand-2-239-2023-supplement.zip]

Archive with 4 entries (4 files):
- sand-2023-96_2023-09-13_WS-07_Radiation-exposure-in-the-Chernobyl-area_BfS.pdf
- sand-2023-96_2023-09-13_WS-07_Promoting-Stakeholder-Participation_Nagra.pdf
- sand-2023-96_2023-09-13_WS-07_Nuclear_Power_in_Europe_SKD_final.pdf
- sand-2-239-2023-supplement-title-page.pdf
