# Supplementary material for: Geodata for the public – best practice examples from GIS and web applications
Source: Copernicus journal article supplement (doi:10.5194/sand-2-239-2023), 2023-09-06
Supplement: Supplementary file 2 [file sand-2-239-2023-supplement.zip › sand-2023-96_2023-09-13_WS-07_Nuclear_Power_in_Europe_SKD_final.pdf]

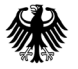

Federal Agency for  
Cartography and Geodesy

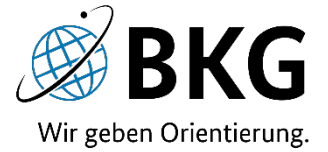

# Nuclear Power in Europe

## A web application of an overview of nuclear power plants (NPPs) across Europe

Berlin, 12th September 2023

Marian Graumann (BKG)

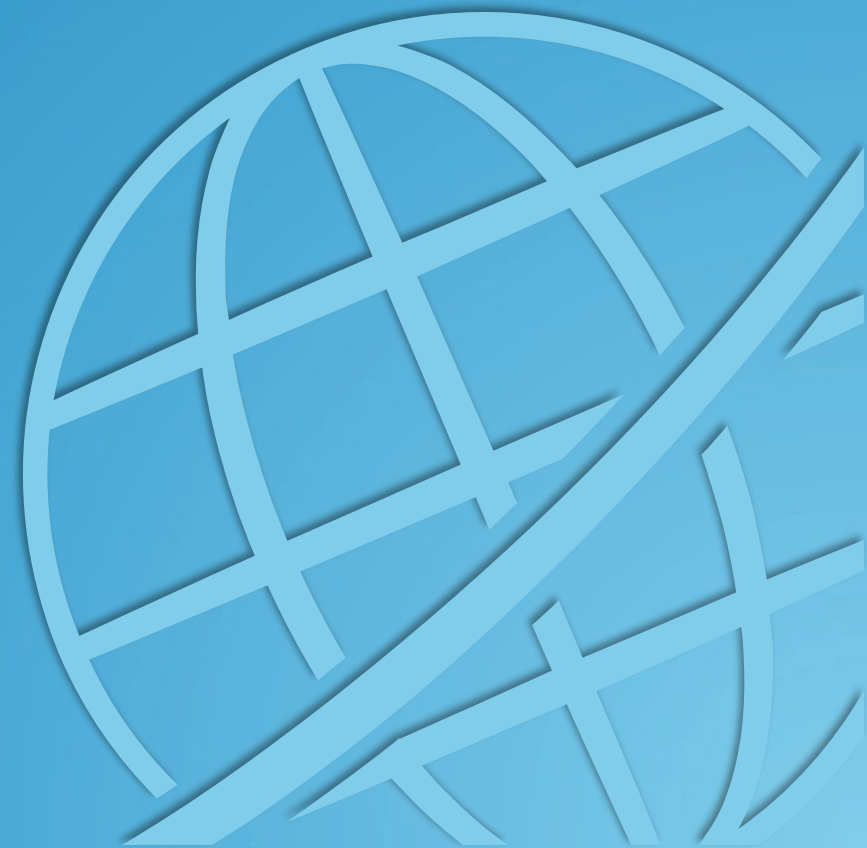

# Agenda

- 1. Federal Agency for Cartography and Geodesy**
2. Satellite-Based Crisis and Spatial Information Service (SKD)
3. Nuclear Power in Europe
  - a. Initial situation
  - b. The application
  - c. Upcoming developments

# Who is BKG ?

- A **technical agency** under the **Federal Ministry of the Interior and Community**, with specialist departments in geodesy and geoinformation
- The **central service provider** of topographic data, cartography, and geodetic reference systems for the German federal government
- **Operators of a service center for geospatial information and geodesy**
- Representative of Germany's interests in geospatial information at European and international level
- Providers of training in the professions of geomatics technician and precision mechanic

[www.bkg.bund.de/EN/](http://www.bkg.bund.de/EN/)

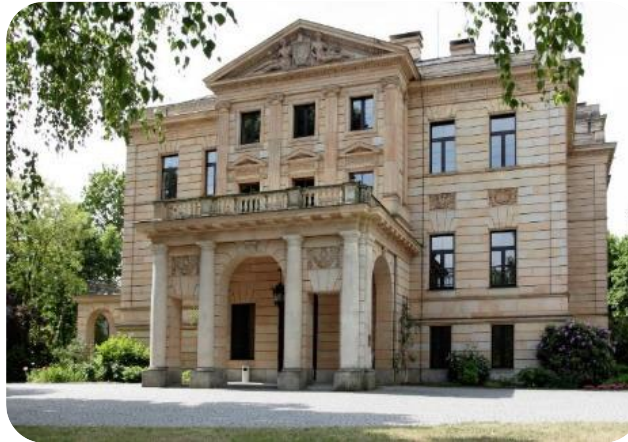

**Geoportal**  
[www.geoportal.de](http://www.geoportal.de)

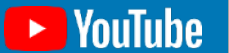

**Digital Atlases**  
[www.bkg.bund.de/atlanten](http://www.bkg.bund.de/atlanten)

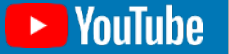

# Who is BKG?

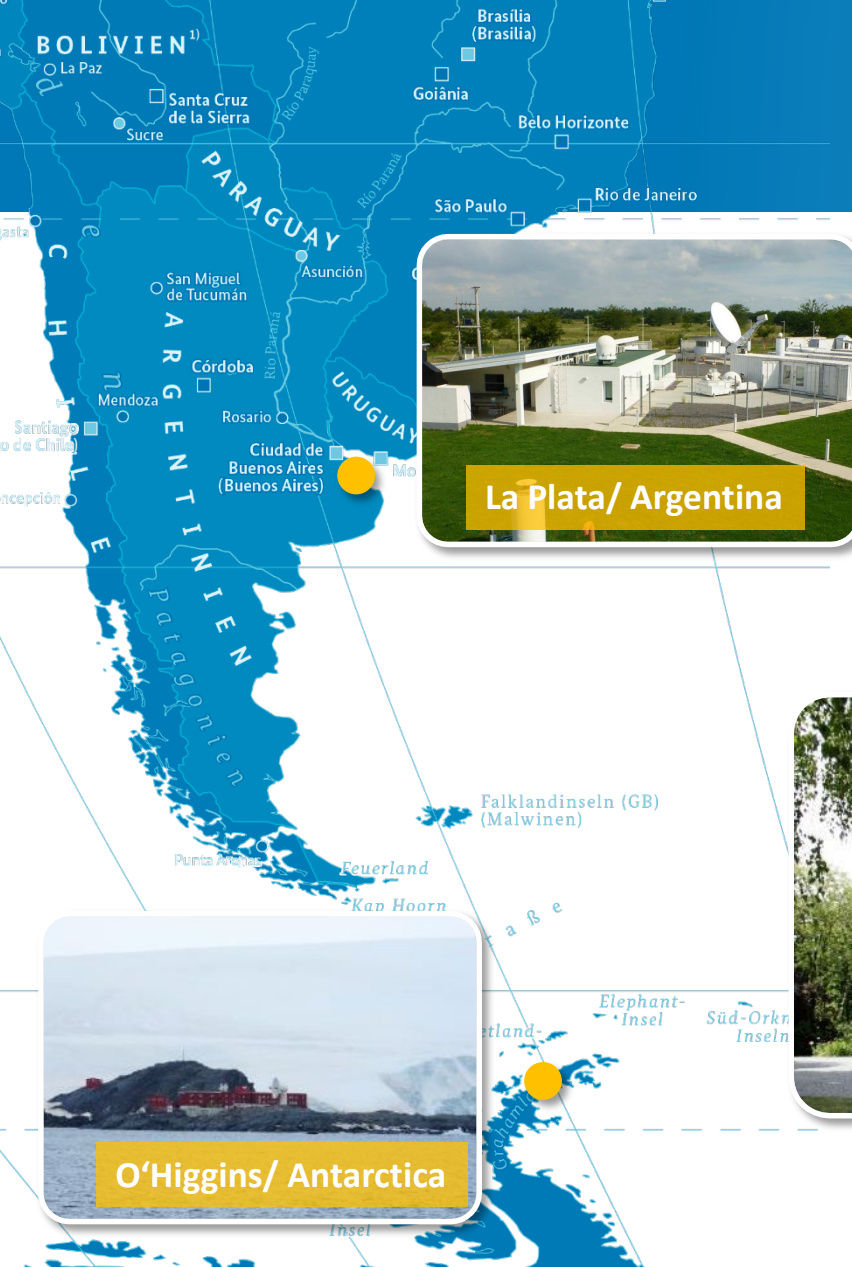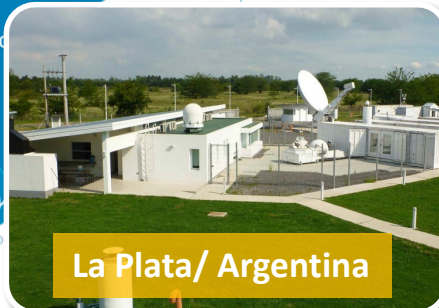

La Plata/ Argentina

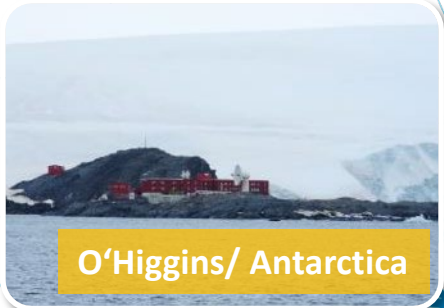

O'Higgins/ Antarctica

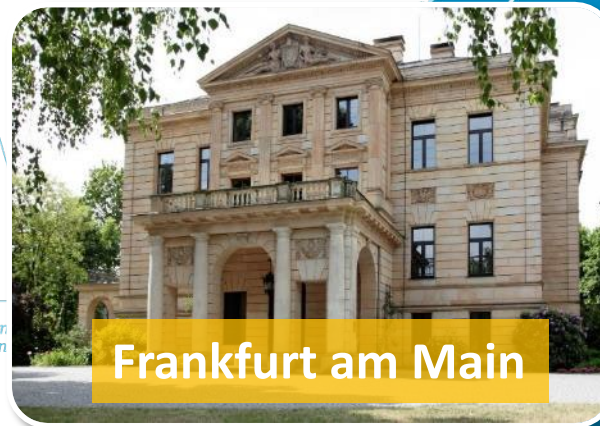

Frankfurt am Main

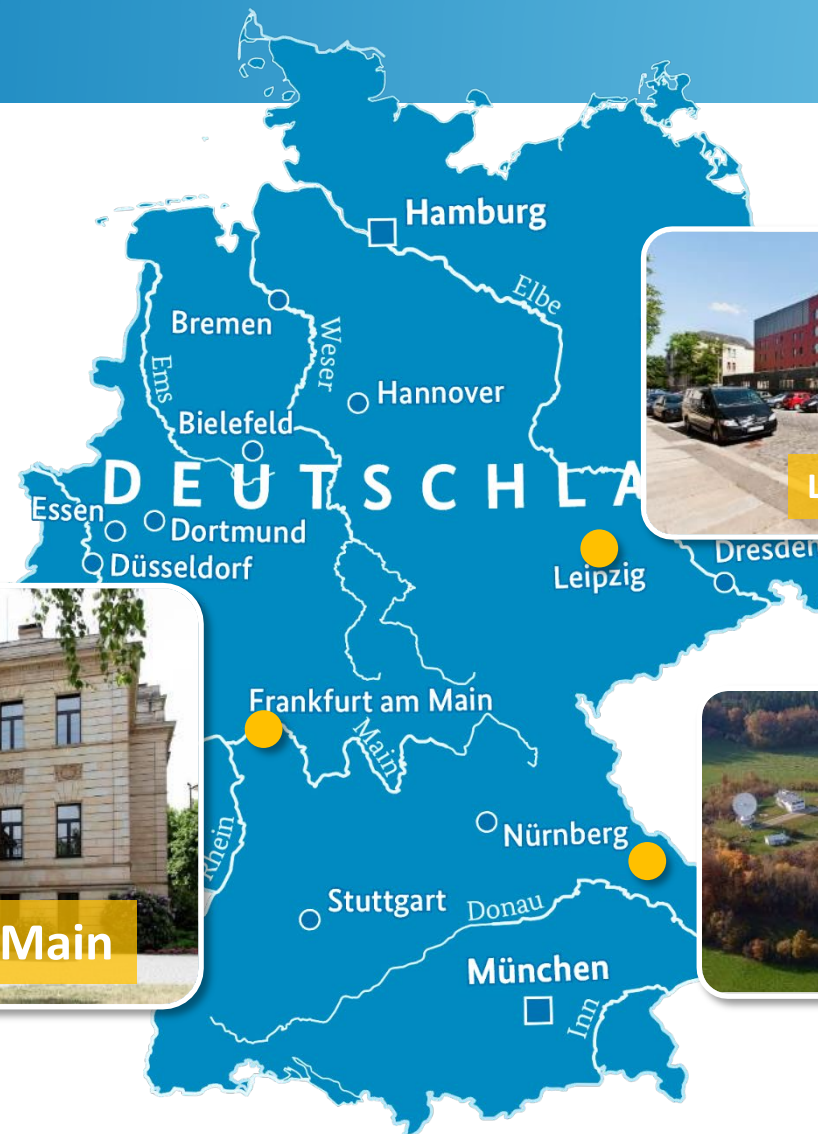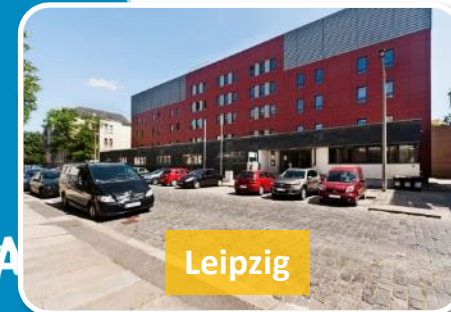

Leipzig

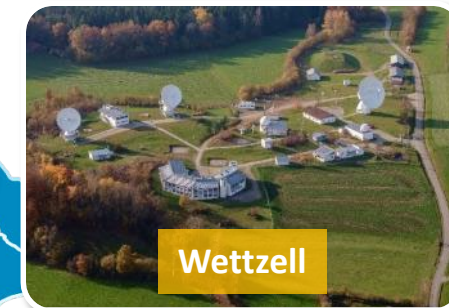

Wettzell

# Agenda

1. Federal Agency for Cartography and Geodesy
- 2. Satellite-Based Crisis and Spatial Information Service (SKD)**
3. Nuclear Power in Europe
  - a. Initial situation
  - b. The application
  - c. Upcoming developments

# Our unit @ BKG: The SKD

- **The Satellite-Based Crisis and Spatial Information Service**  
(German: Satellitengestützter Krisen- und Lagedienst, SKD)
- **Prospering unit at BKG**
  - Currently 22 employees in the SKD team (growing)
  - 12/7 standby availability
- **On-demand geospatial services for authorised users**
  - Remotely sensed information
  - Mapping and map production
- **All SKD services are free of charge to Federal Agencies in Germany**

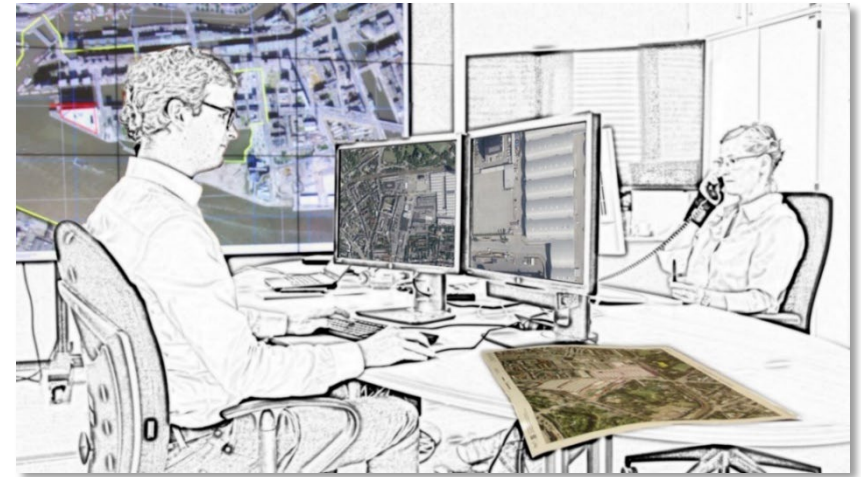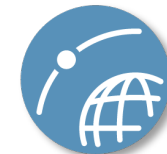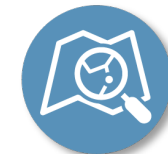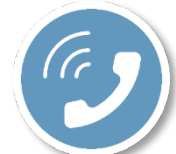

# Our mission

**We create highly specialized analyses and map  
products for federal agencies and others**

# We use BKG's geospatial and technical data as an important basis

Remote sensing

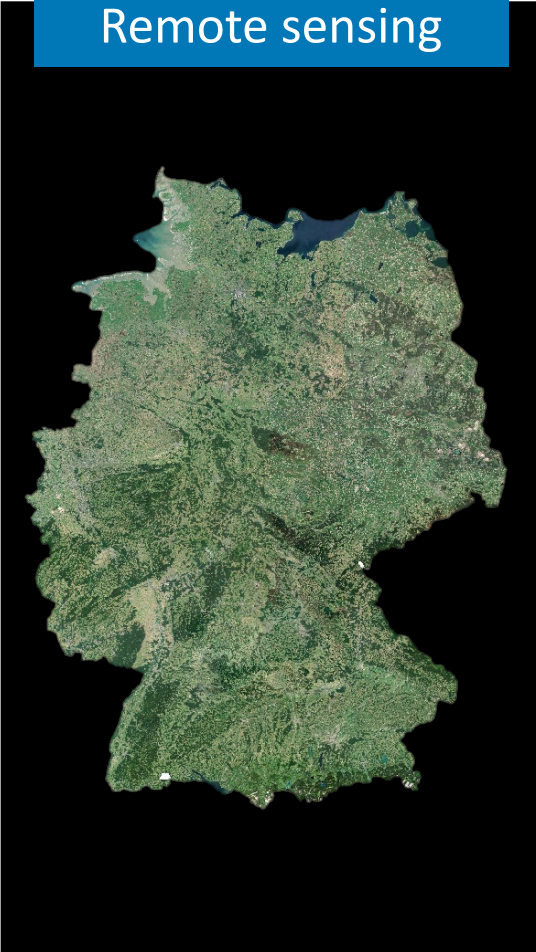

Statistics

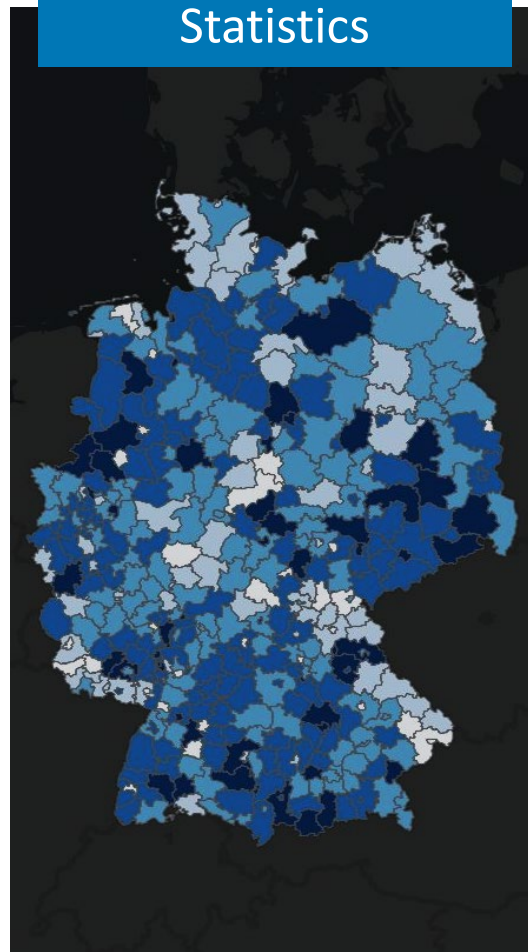

Infrastructure

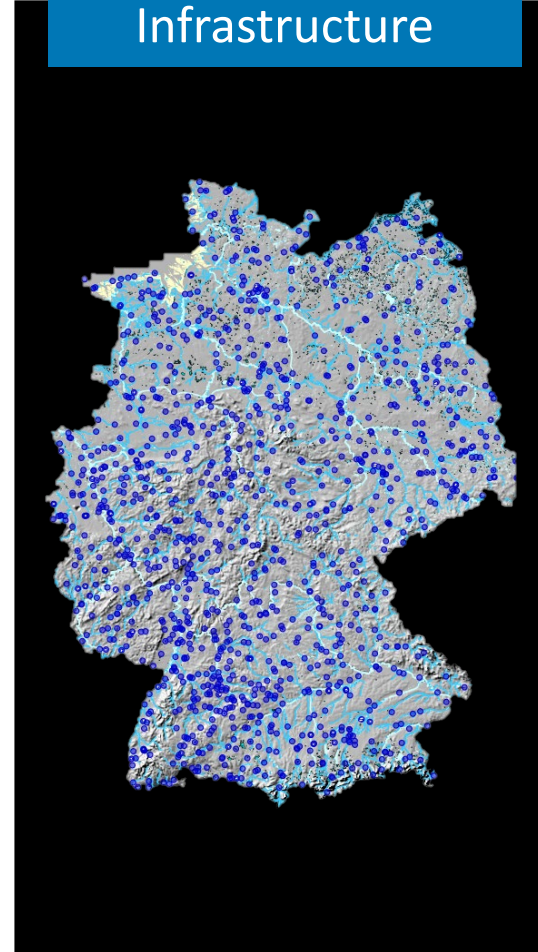

Sensor data

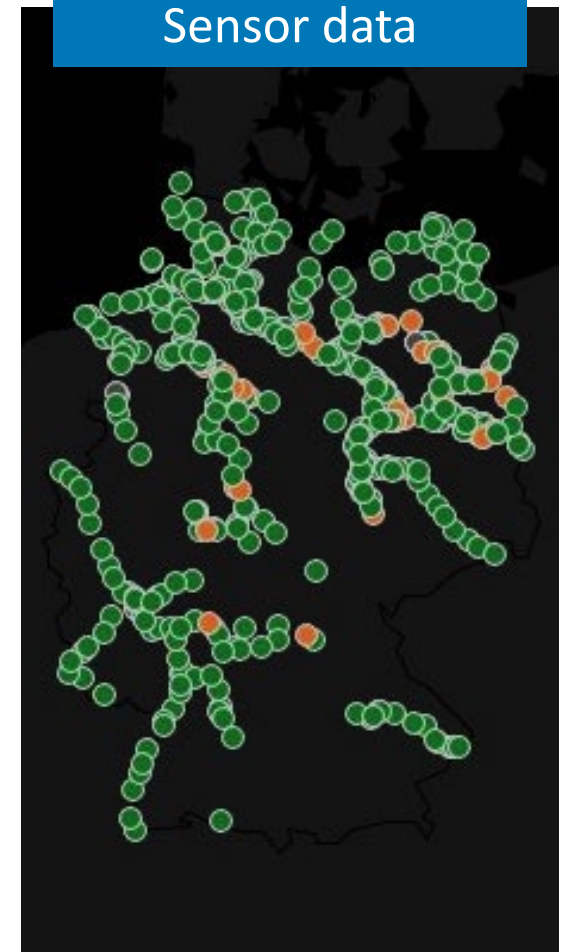

# Our philosophy of geo-intelligence is ...

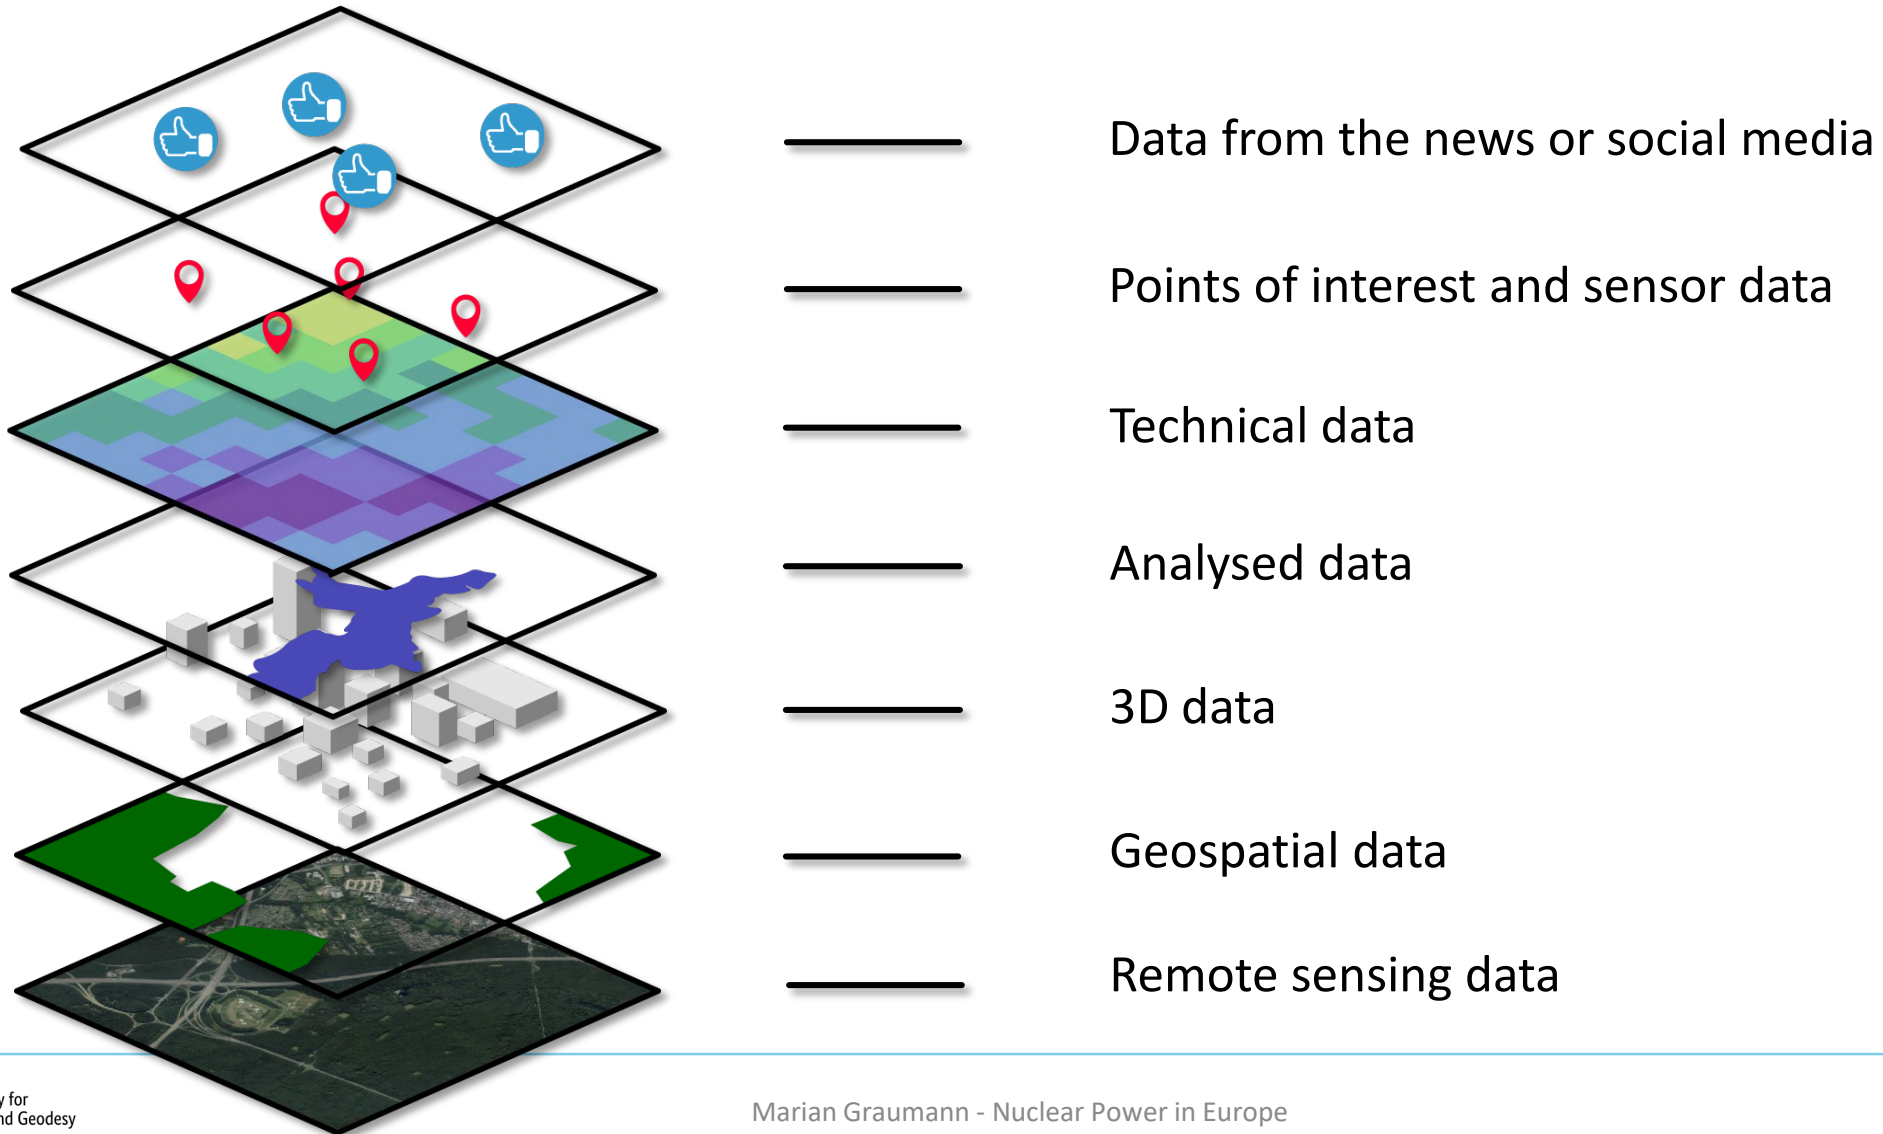

# Our remote sensing and geospatial services

- The services include:
  - **Rapid and responsive mapping system** for individual on-demand products for special requirements (e.g. natural hazards, security, humanitarian crises, ...)
  - **Standard products based on user requirements**
  - **Specialised thematic maps, web applications**
  - **Trainings and knowledge transfer** on the potential of remote sensing
  - **Consultation and user support** for individual solutions (incl. classified contents)

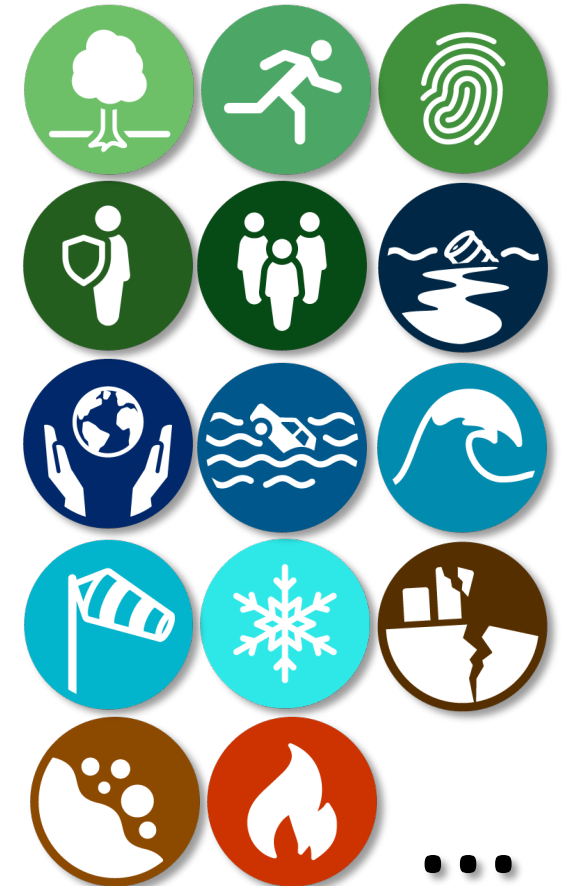

# Agenda

1. Federal Agency for Cartography and Geodesy
2. Satellite-Based Crisis and Spatial Information Service (SKD)
- 3. Nuclear Power in Europe**
  - a. Initial situation
  - b. The application
  - c. Upcoming developments

# Initial situation

- Previous order for BASE
- Initial webmeeting concerning web maps and web applications
- SKD was officially commissioned by the editorial team
- Project kickoff with a rough timeline
- Several rounds of revisions and adjustments
- First prototype was completed

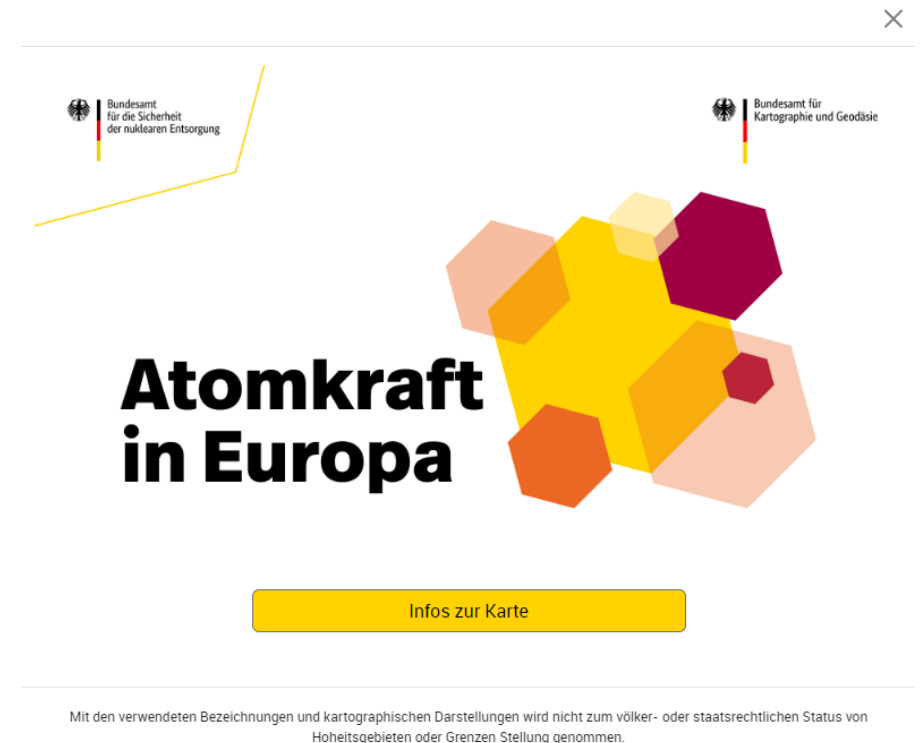

# The application

- A web viewer optimized for desktop PCs
- Basic web GIS tools
- A legend for explaining the features and for activating individual layers
- Feature information for each object on the map
- More objects in Germany become visible after zooming in

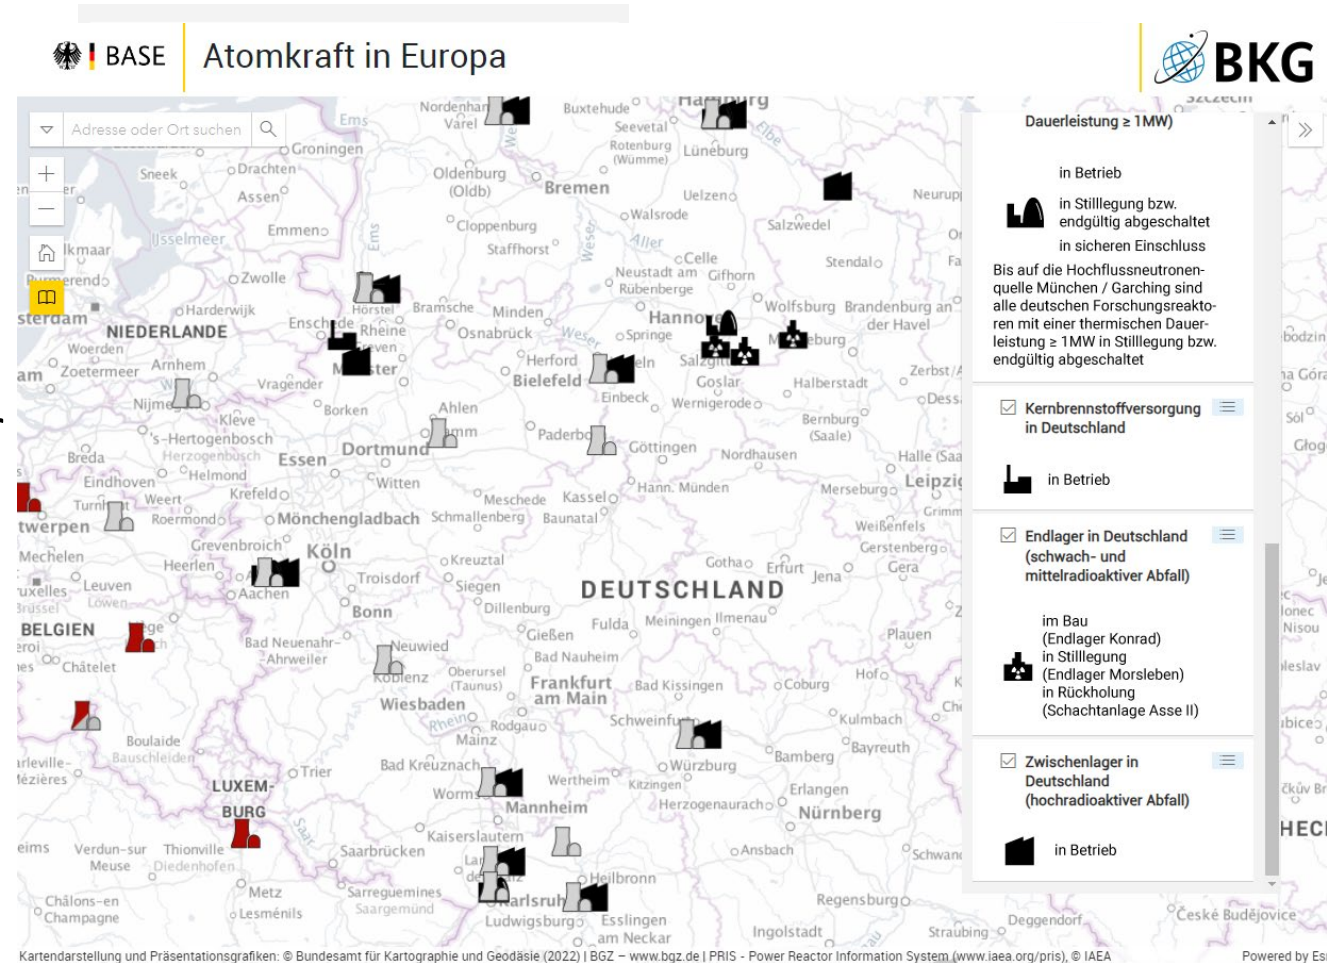

# Upcoming developments

- Continuous updating process
- Publication
- More Data
- Available worldwide

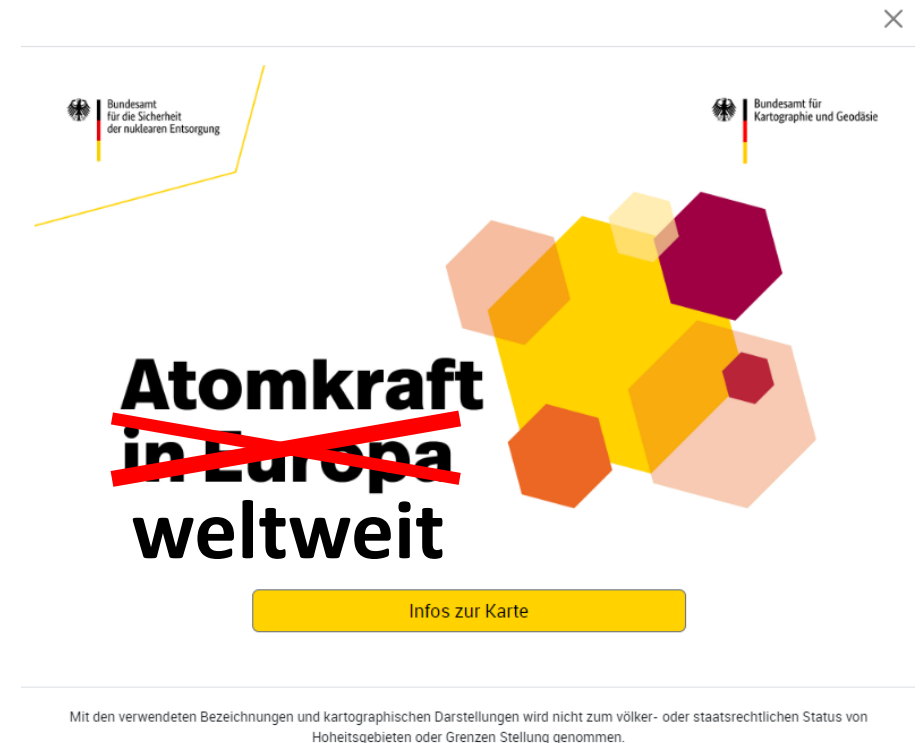

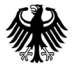

Federal Agency for  
Cartography and Geodesy

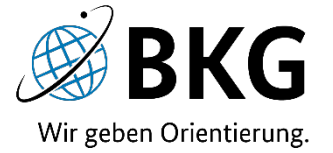

# Time for questions!

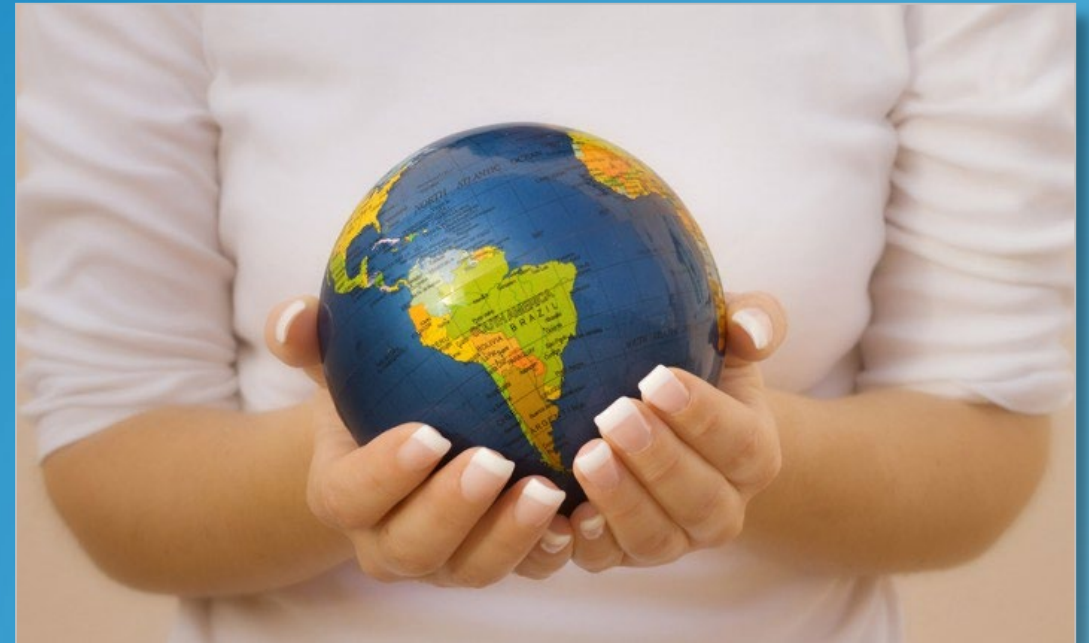

Federal Agency for Cartography and Geodesy  
Marian Graumann

Richard-Strauss-Allee 11  
60598 Frankfurt am Main

skd@bkg.bund.de  
marian.graumann@bkg.bund.de  
www.bkg.bund.de  
Phone +49 69 6333 – 455
