# Supplementary material for: Geodata for the public – best practice examples from GIS and web applications
Source: Copernicus journal article supplement (doi:10.5194/sand-2-239-2023), 2023-09-06
Supplement: Supplementary file 2 [file sand-2-239-2023-supplement.zip › sand-2023-96_2023-09-13_WS-07_Promoting-Stakeholder-Participation_Nagra.pdf]

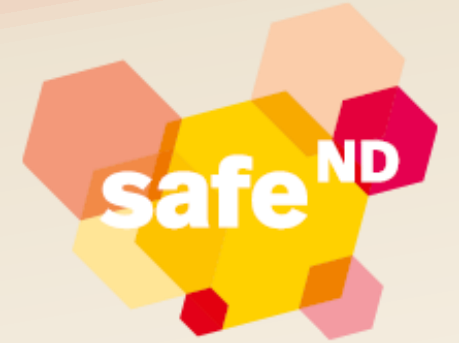

# PROMOTING STAKEHOLDER PARTICIPATION USING GIS - HOW (NOT) TO DO IT

safeND, Berlin, 2023-09-13

Dr. Andreas von der Dunk

**nagra**●

# AGENDA

---

- Status of Swiss Site Selection Process
- Public participation using WebGIS
- 3D Viewer for Geological Models
- Open Data Portal

# STATUS OF SWISS SITE SELECTION PROCESS

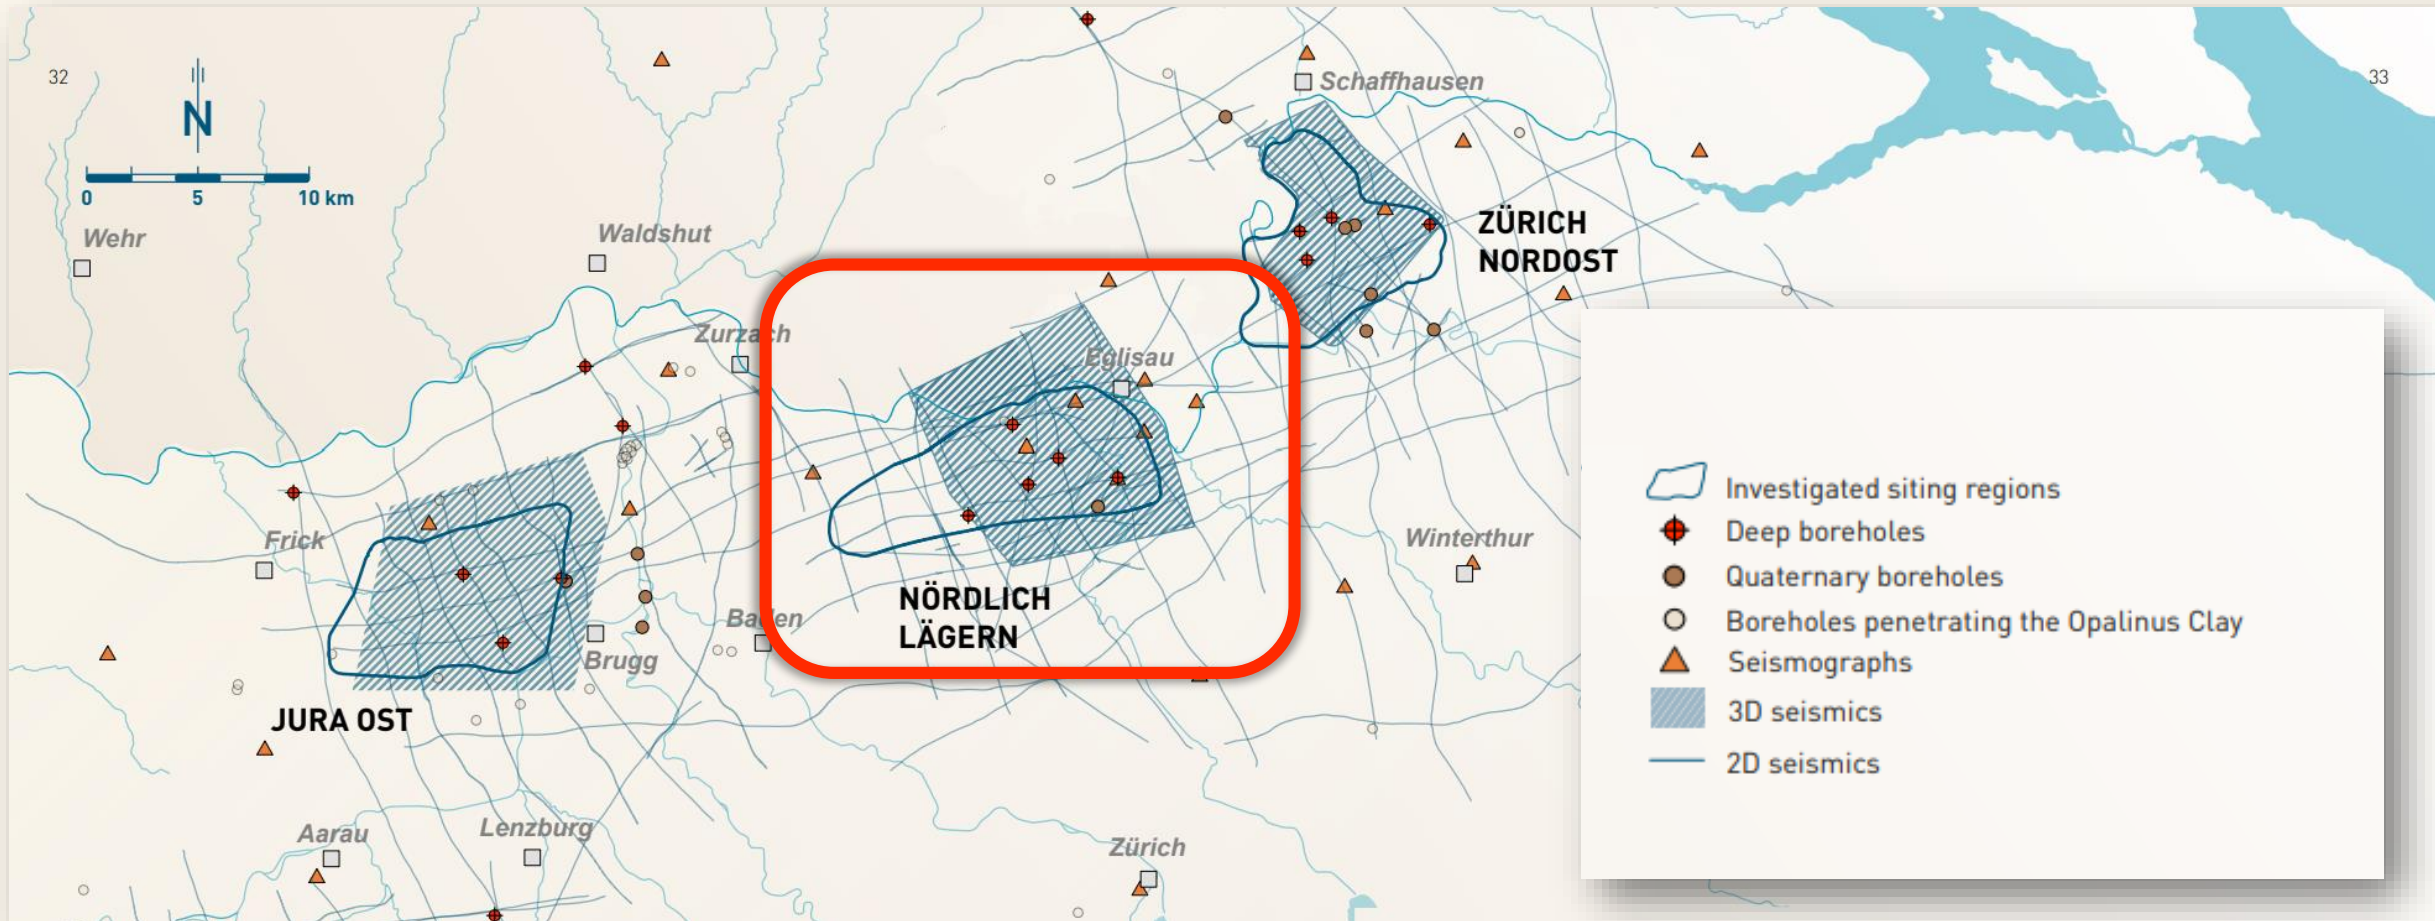

# PUBLIC PARTICIPATION USING WEBGIS

- Public participation in the placement of **surface facilities**

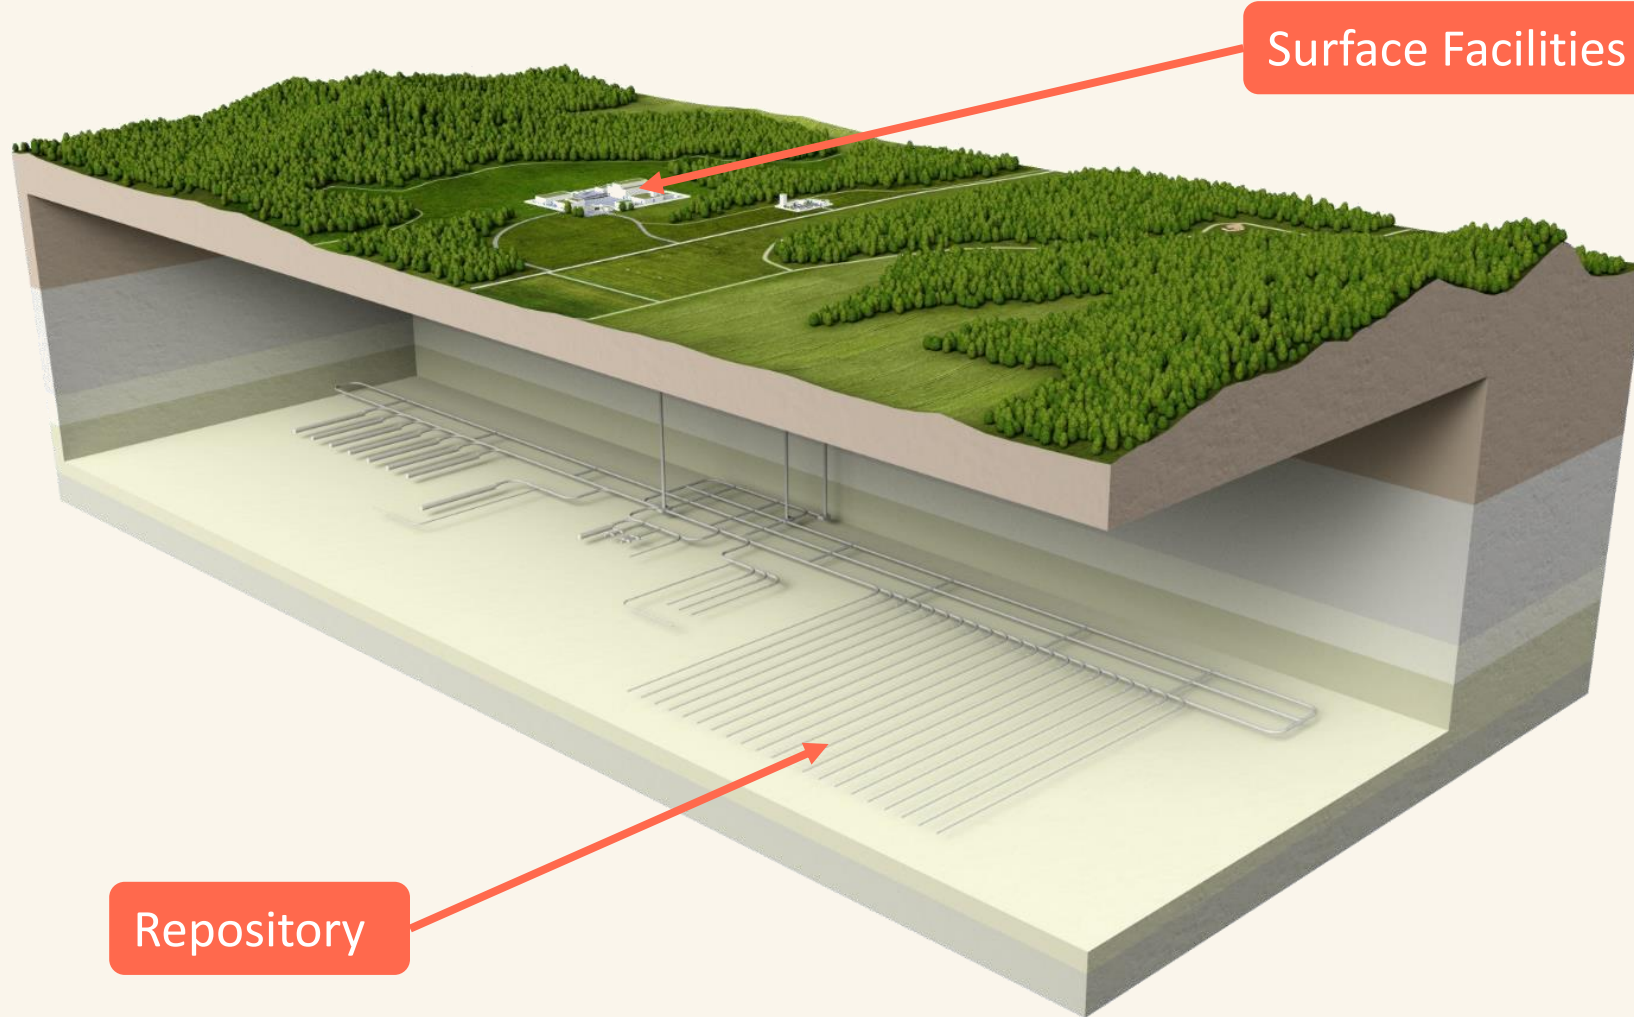

# PUBLIC PARTICIPATION USING WEBGIS

- Regular meetings of local **residents**, advised by independent **experts**
- Purpose: **understand & discuss** Nagra's proposals

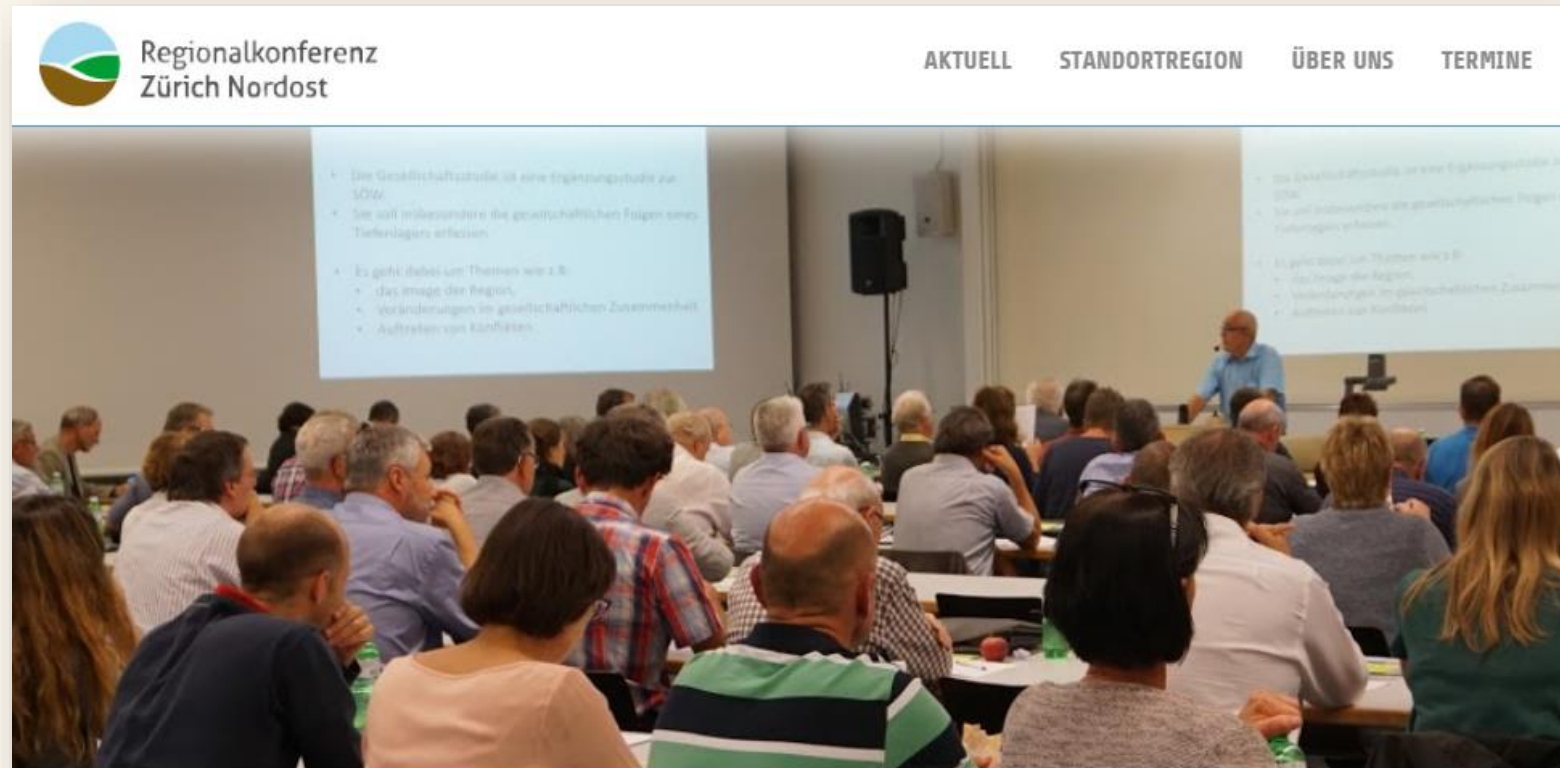

# PUBLIC PARTICIPATION USING WEBGIS

- Nagra provided **static maps** to facilitate discussion during participatory meetings

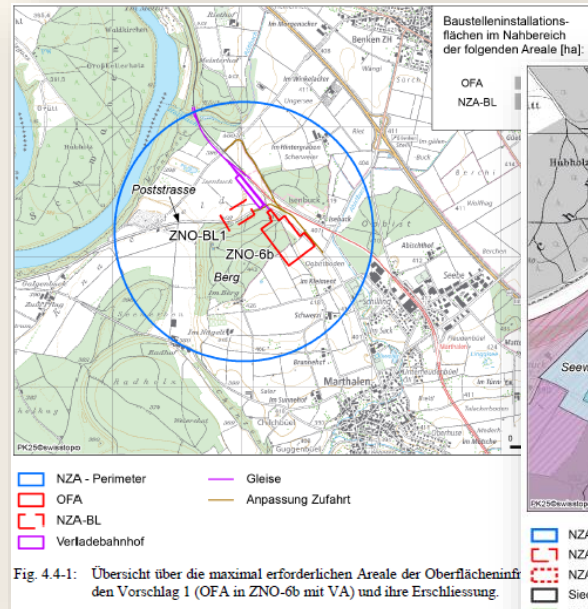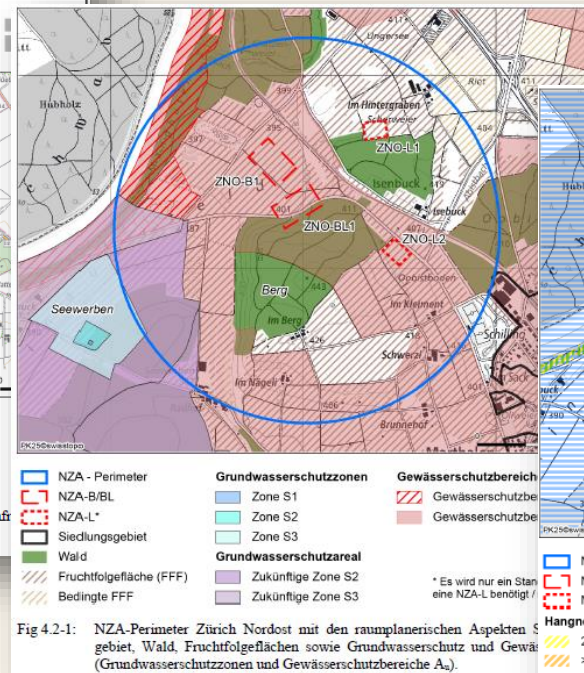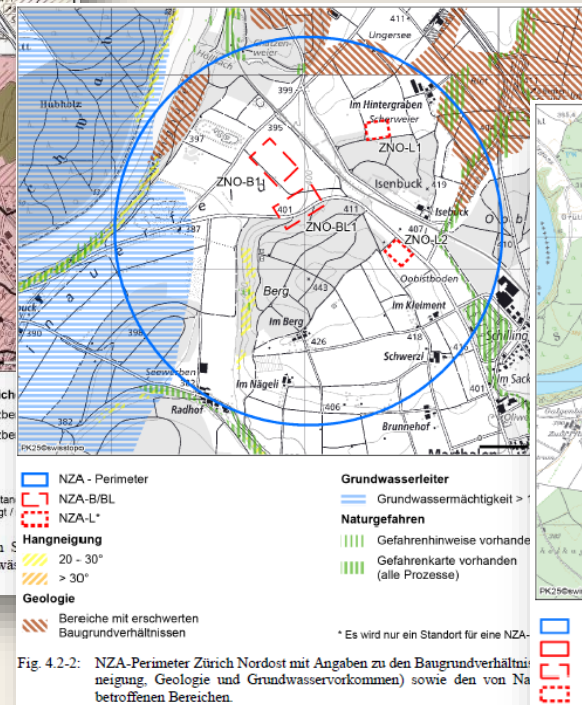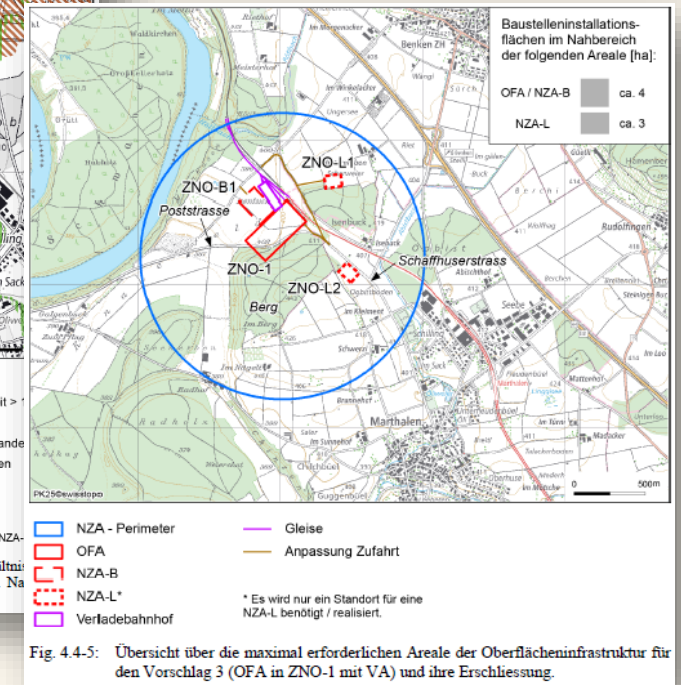

# PUBLIC PARTICIPATION USING WEBGIS

- Nagra then turned static maps into **interactive WebGIS**

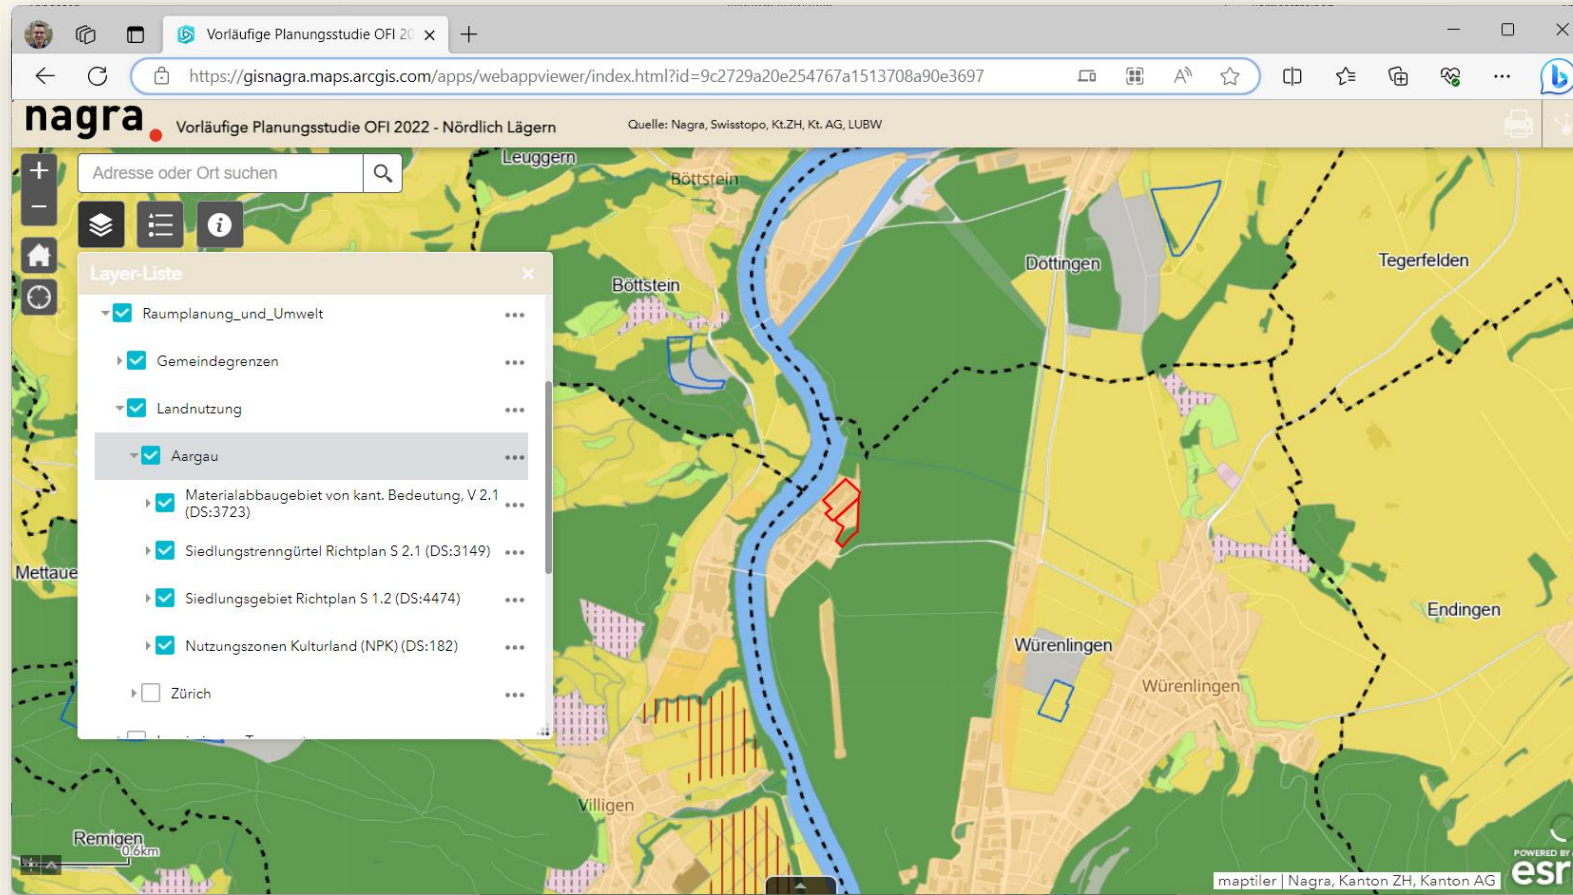

# PUBLIC PARTICIPATION USING WEBGIS

- Nagra has greatly **overestimated public's interest** in using interactive WebGIS

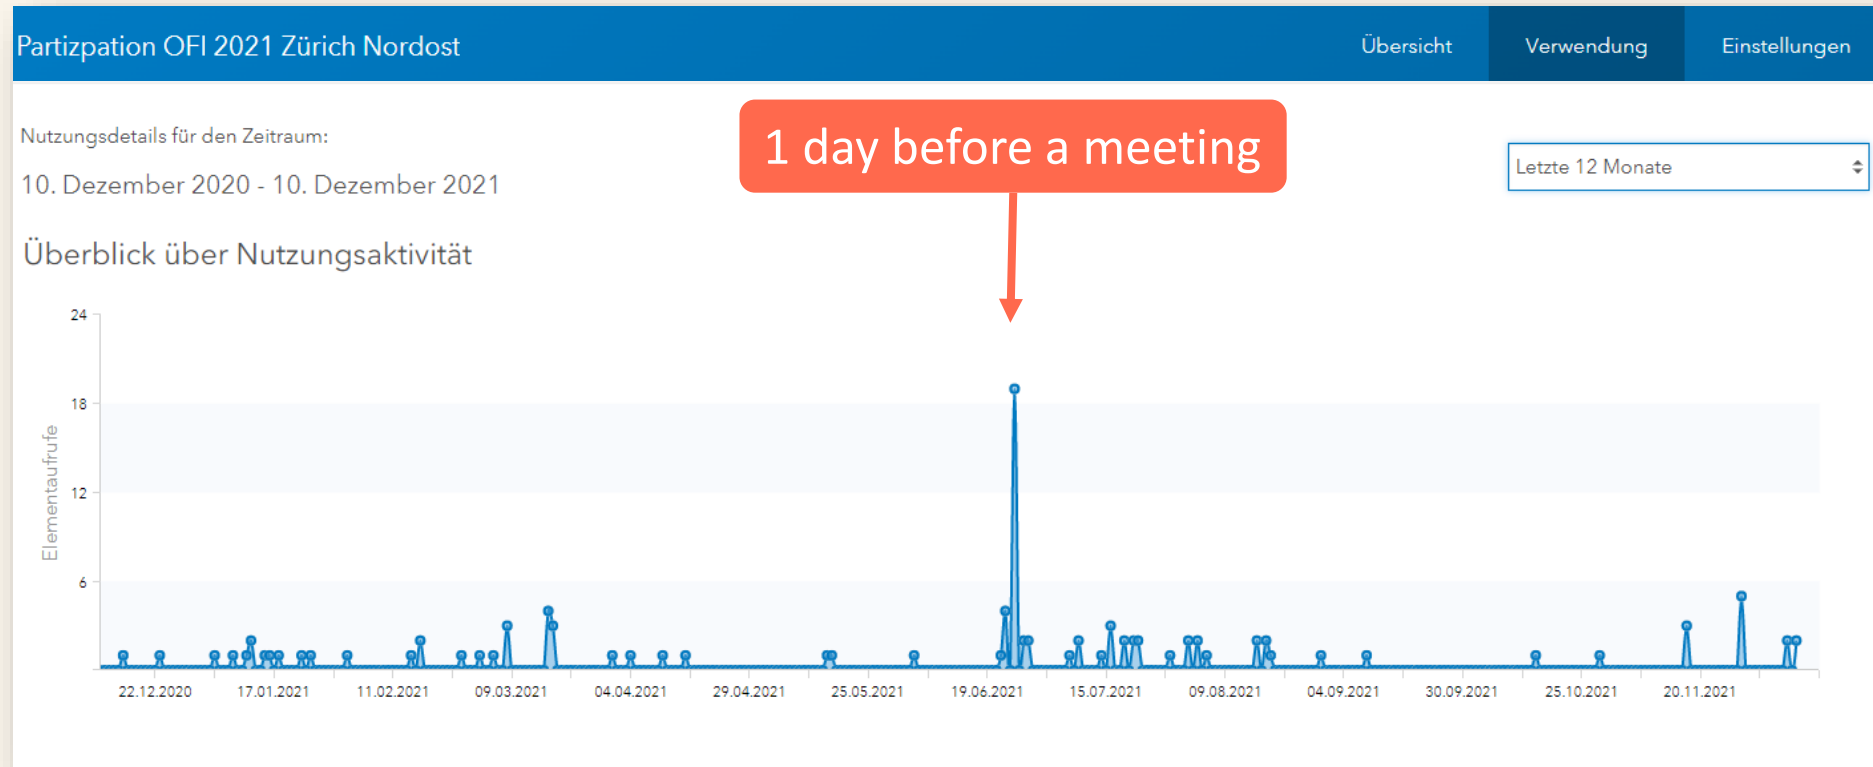

# PUBLIC PARTICIPATION USING WEBGIS

---

Lessons learnt:

- Stakeholders **enjoy maps**
- Stakeholders are **reluctant to use WebGIS**
- Setting up and maintaining a WebGIS **is time consuming** and does not seem to be **worth the effort**
- Before building an app: know your **target audience** & define **purpose of app!**

# 3D GEOLOGICAL VIEWER

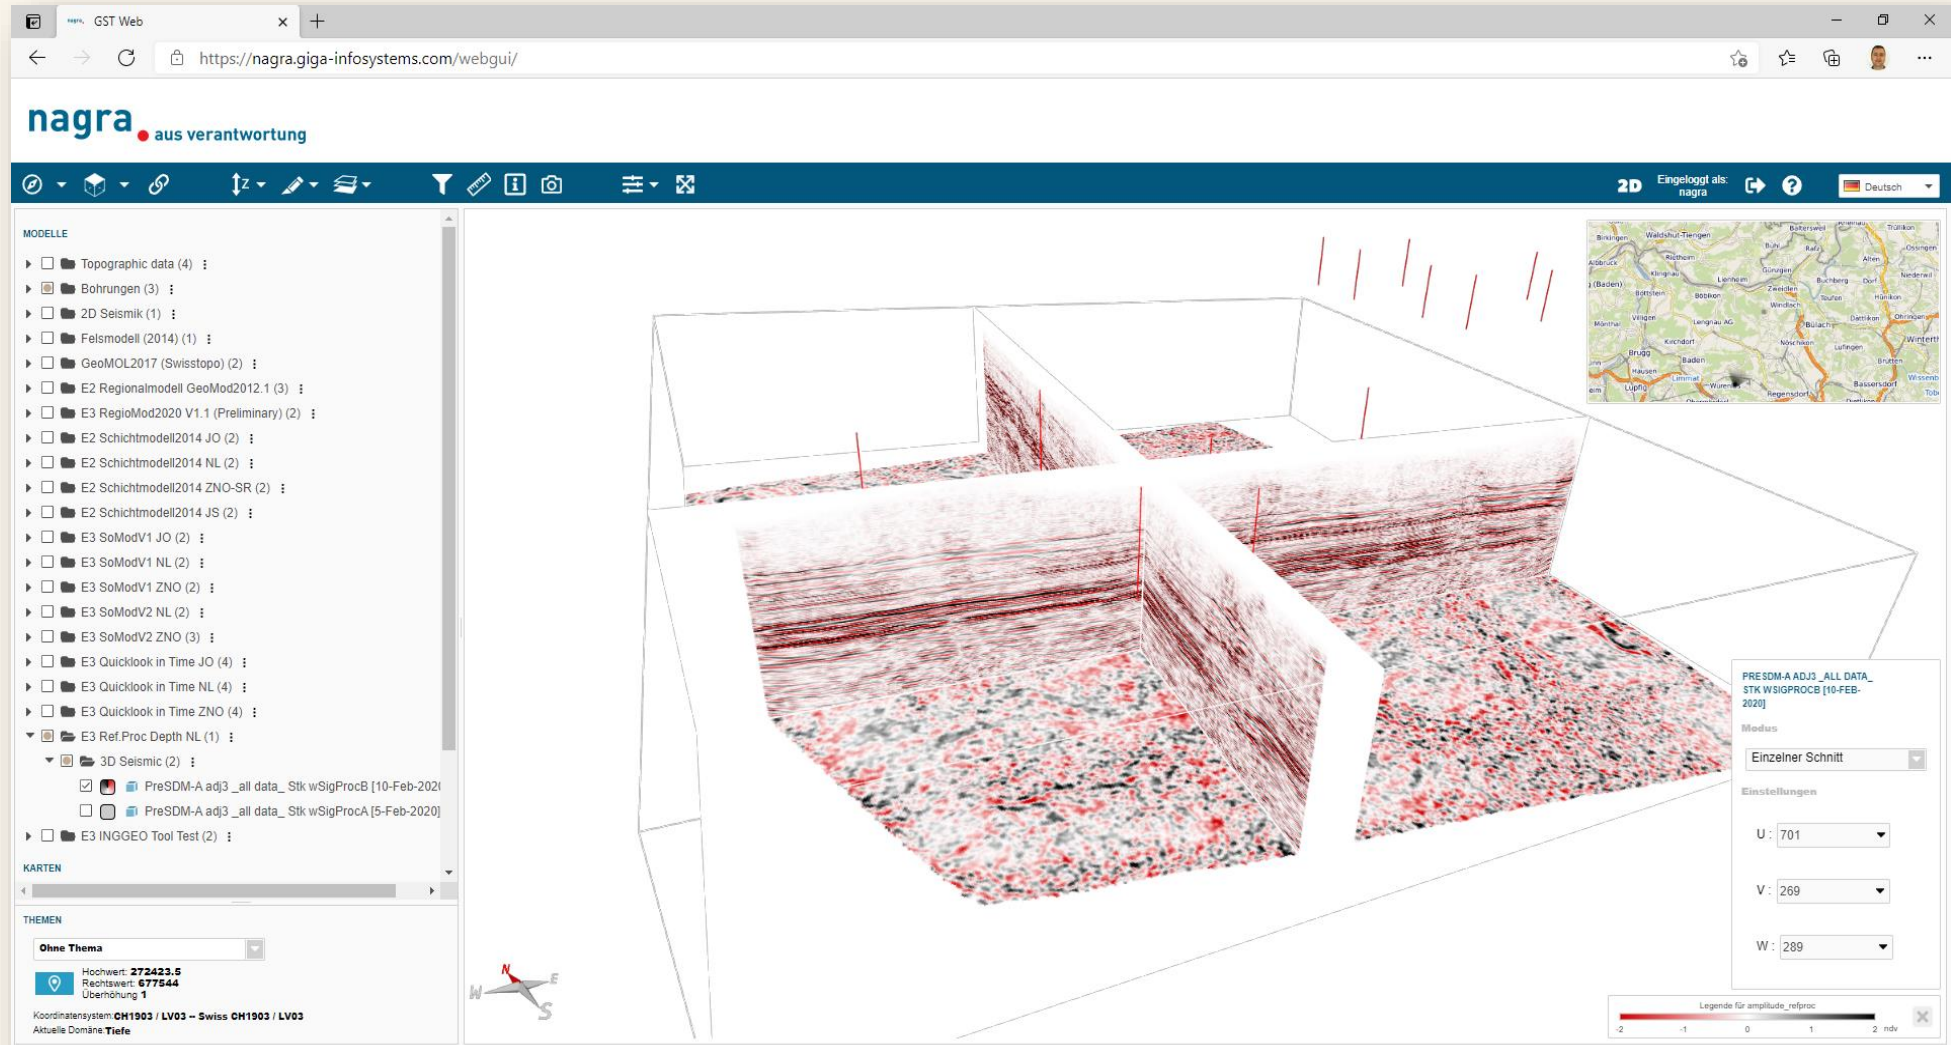

# 3D GEOLOGICAL VIEWER

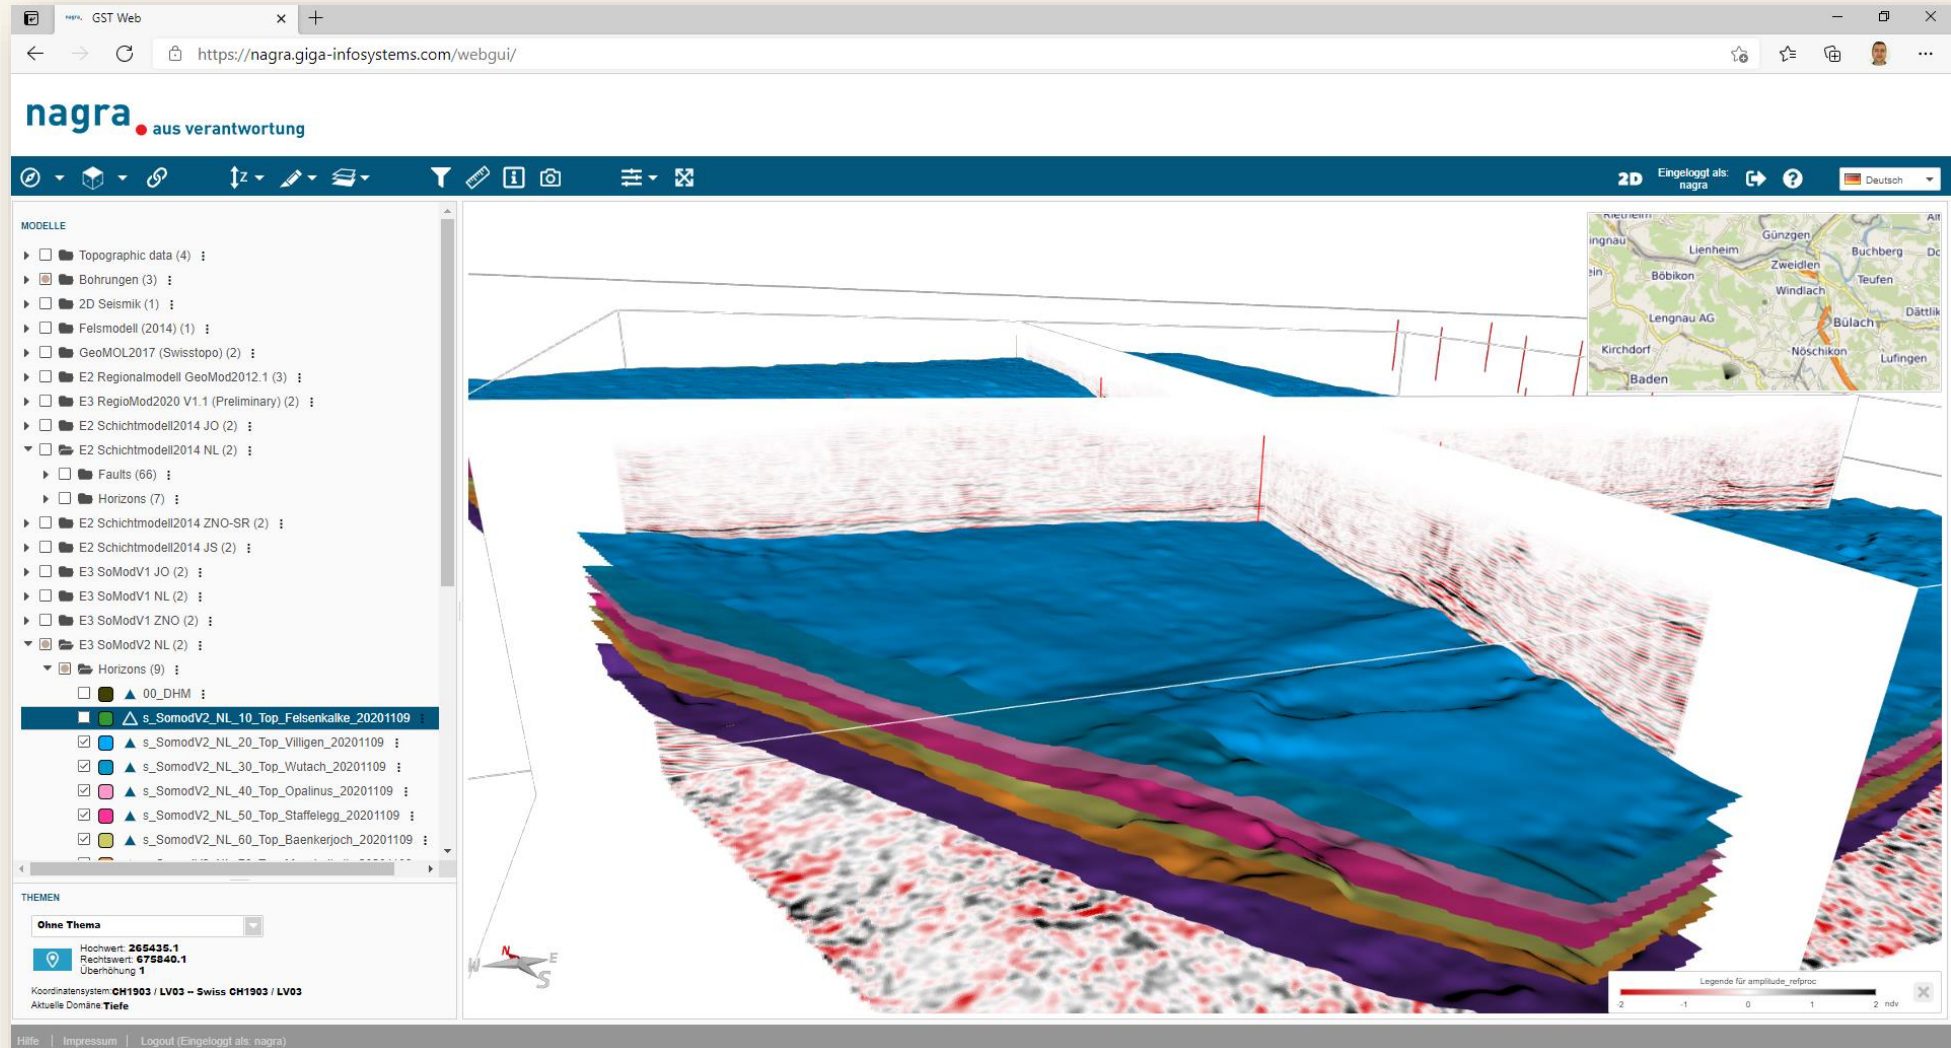

# 3D GEOLOGICAL VIEWER

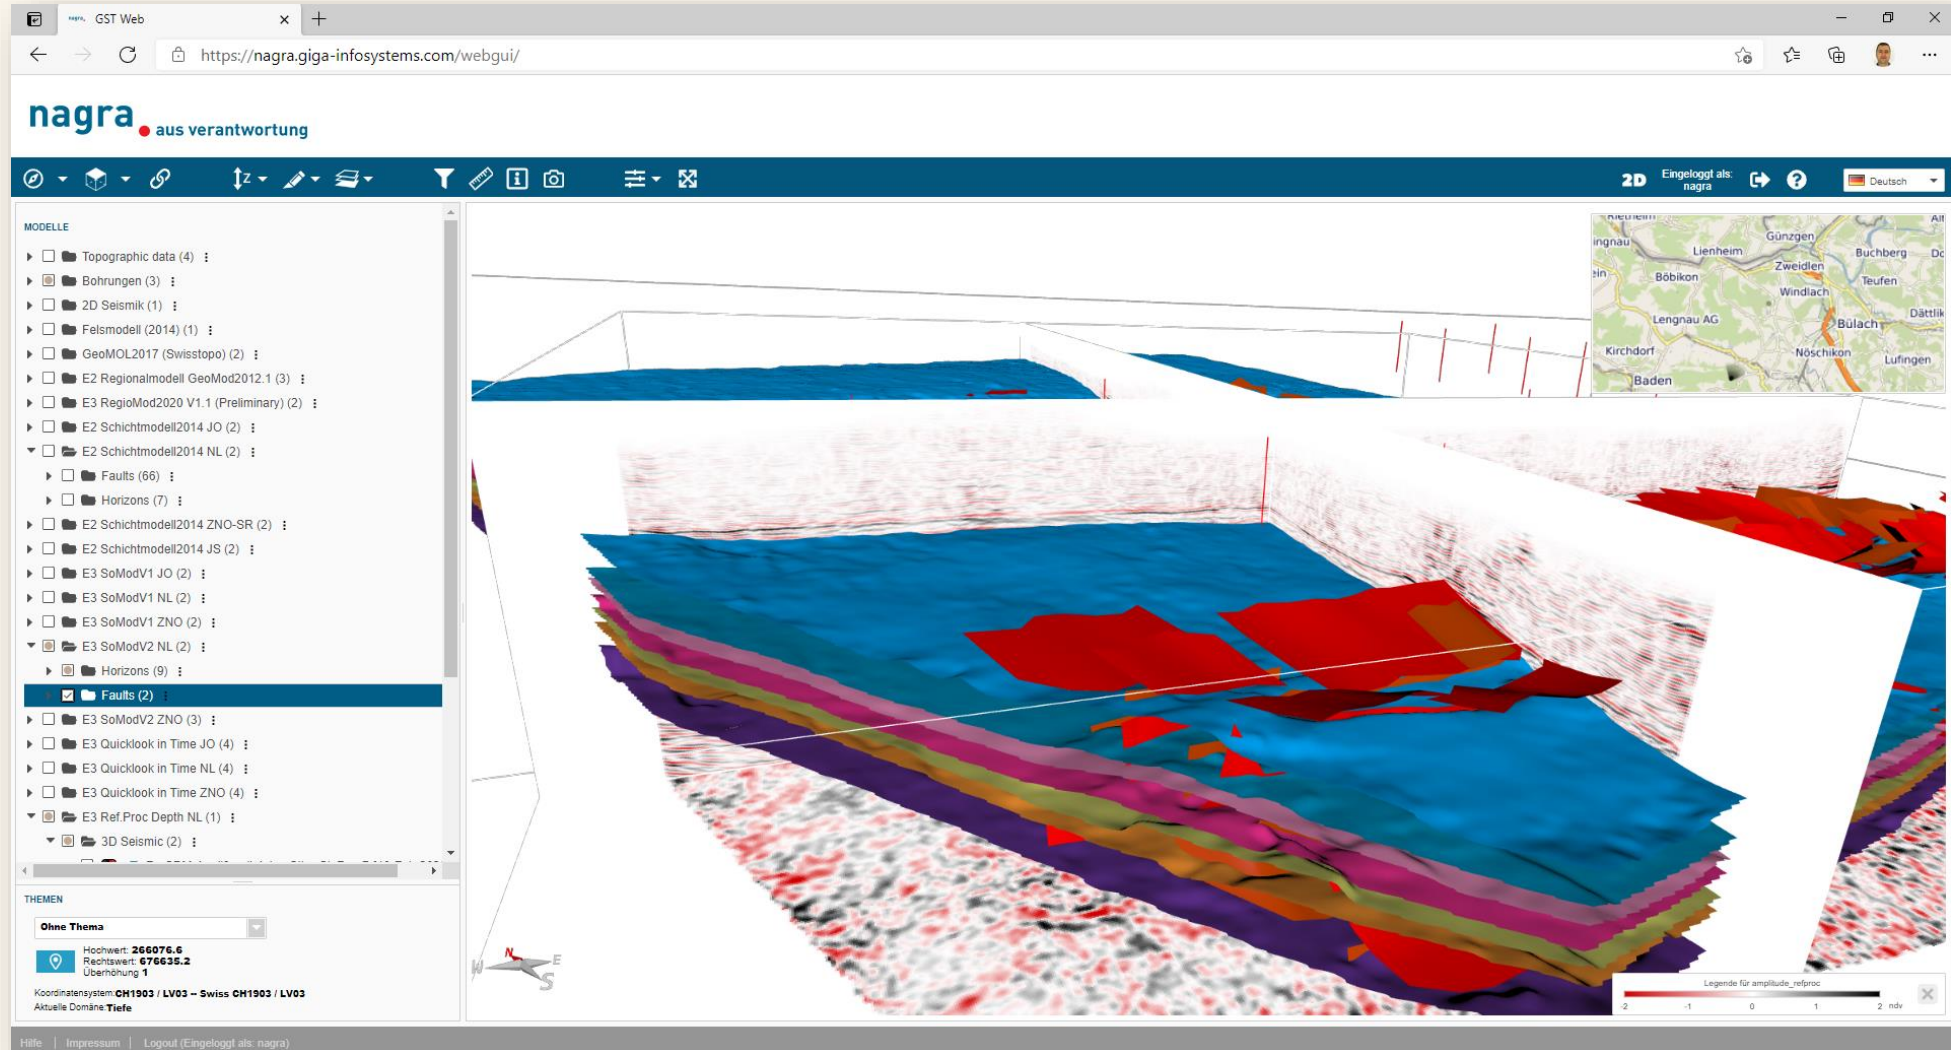

# 3D GEOLOGICAL VIEWER

---

## Target audience:

- scientific public

## Purpose of app:

- showcase geological data available at Nagra
- motivate scientists to **contact Nagra** to request copies of data
- establish **trust**

# OPEN DATA PORTAL (UNDER DEVELOPMENT)

---

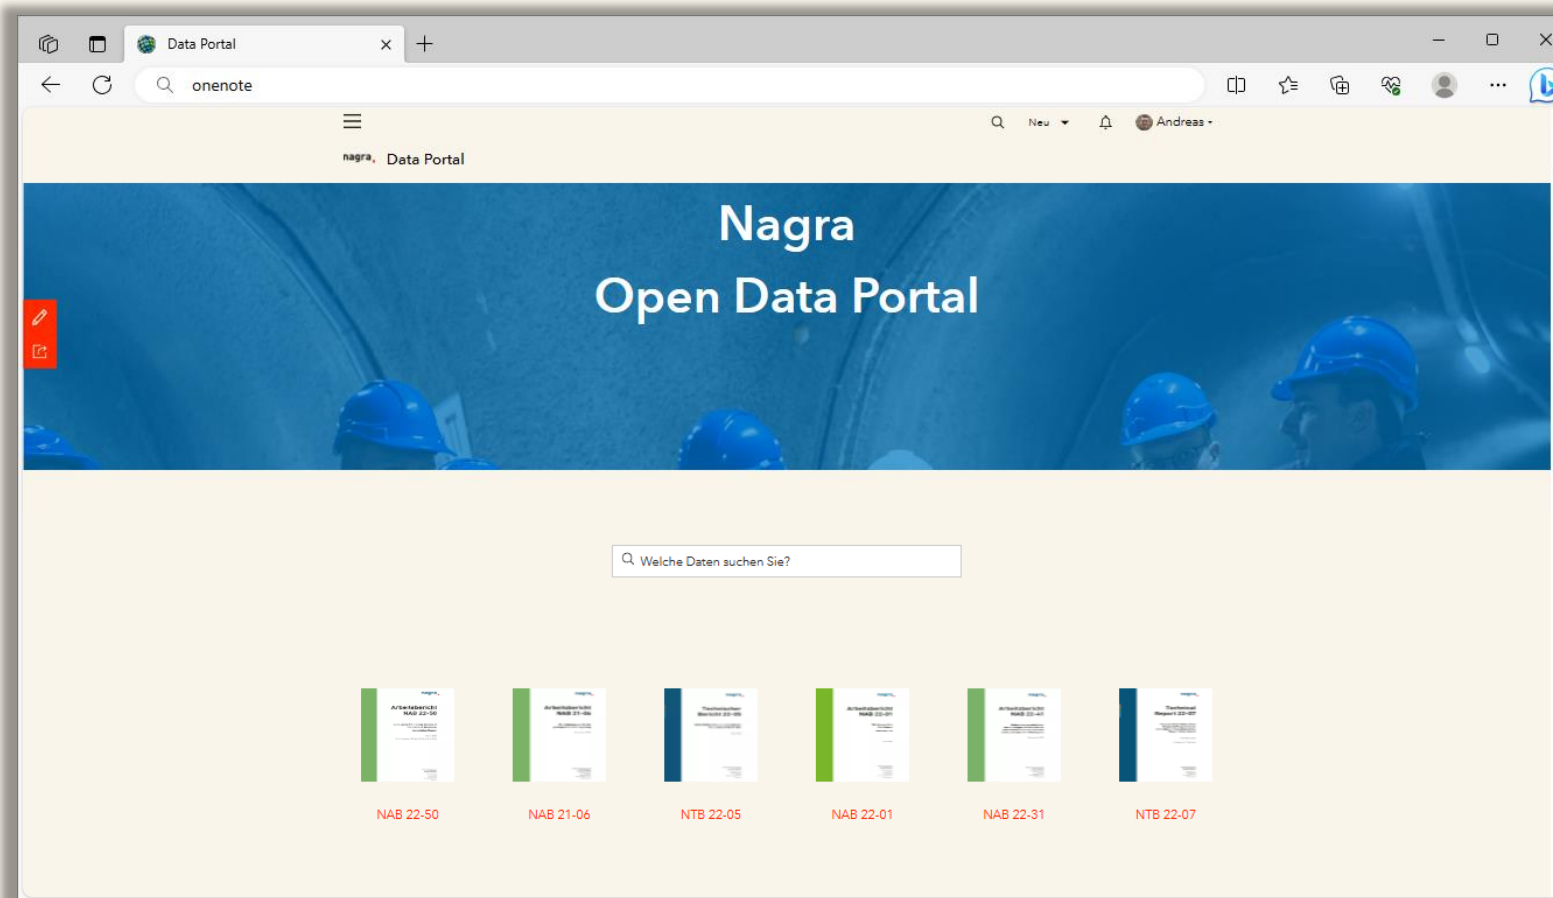

# OPEN DATA PORTAL (UNDER DEVELOPMENT)

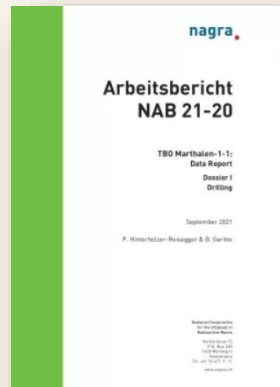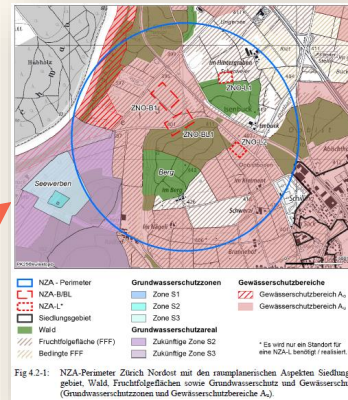

Fig. 1

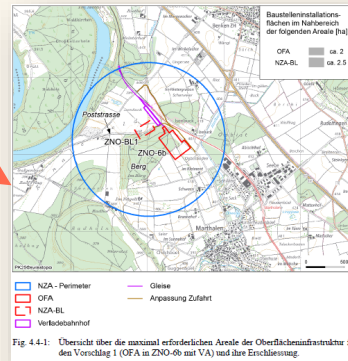

Fig. 2

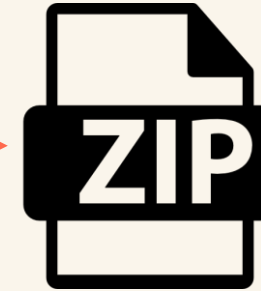

Fig. 1 Data Package

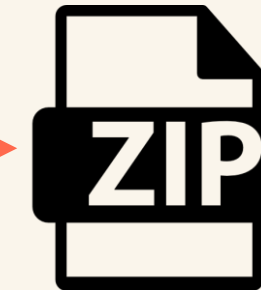

Fig. 2 Data Package

# OPEN DATA PORTAL (UNDER DEVELOPMENT)

---

## Target audience:

- public authorities, NGOs

## Purpose of app:

- offer data and documentation to allow reproduction of figures
- establish trust

# HOW RESILIENT ARE GIS APPS?

---

Tools come and go

- The only thing that **really lasts is data**

Nagra does not have a GIS-Team

- Nagra has a **Data Management Team** (which also operates GIS)

So what does build resilience? Data management!

- making data **findable**
- making data **understandable**
