# Supplementary material for: Geodata for the public – best practice examples from GIS and web applications
Source: Copernicus journal article supplement (doi:10.5194/sand-2-239-2023), 2023-09-06
Supplement: Supplementary file 2 [file sand-2-239-2023-supplement.zip › sand-2023-96_2023-09-13_WS-07_Radiation-exposure-in-the-Chernobyl-area_BfS.pdf]

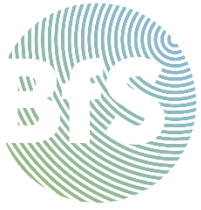

Bundesamt  
für Strahlenschutz

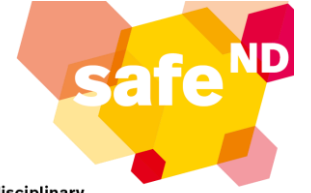

Interdisciplinary  
research symposium  
on the safety of nuclear  
disposal practices

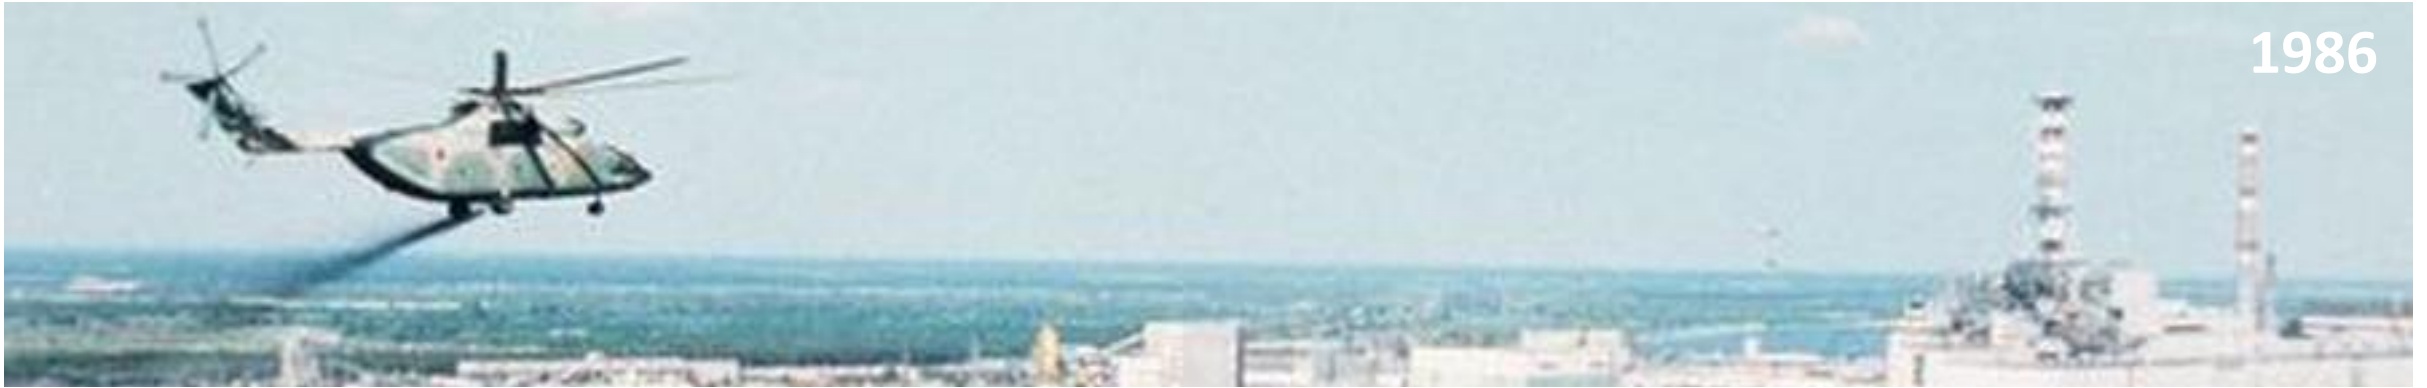

1986

## Radiation exposure in the Chernobyl area - then and now

Christopher Strobl

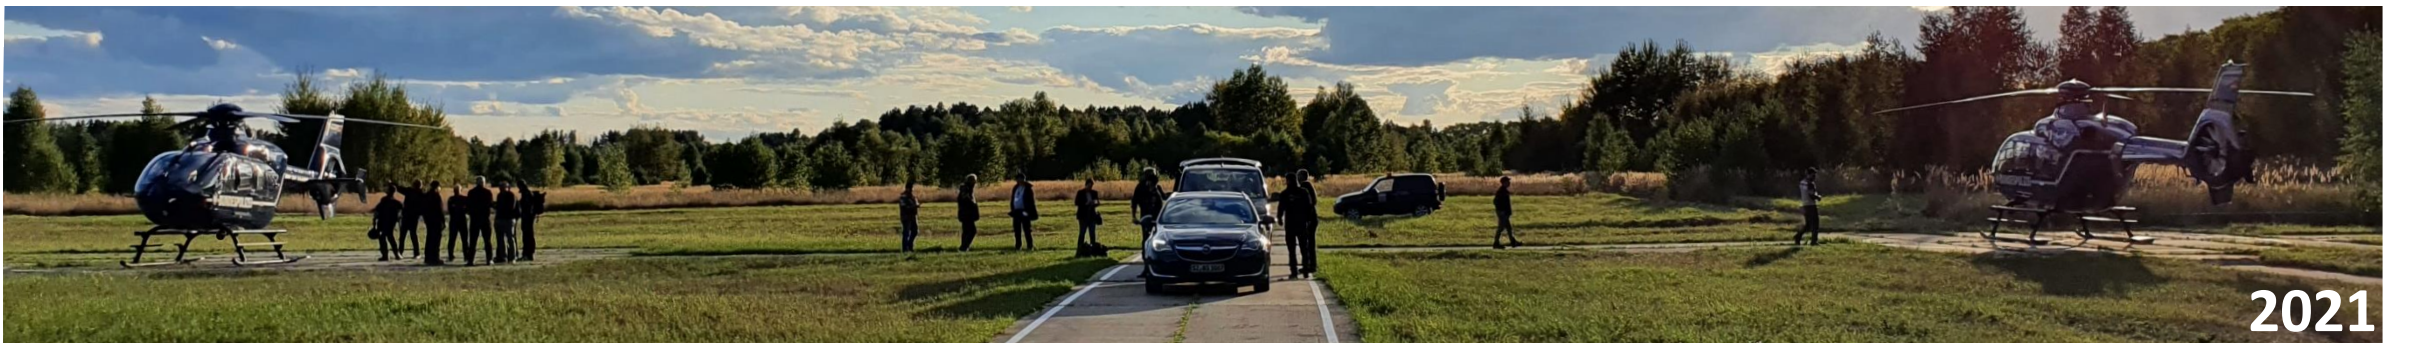

2021

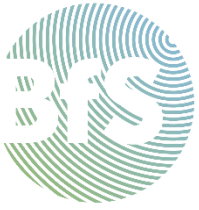

## “Chernobyl” measurement campaign - Professional policy support

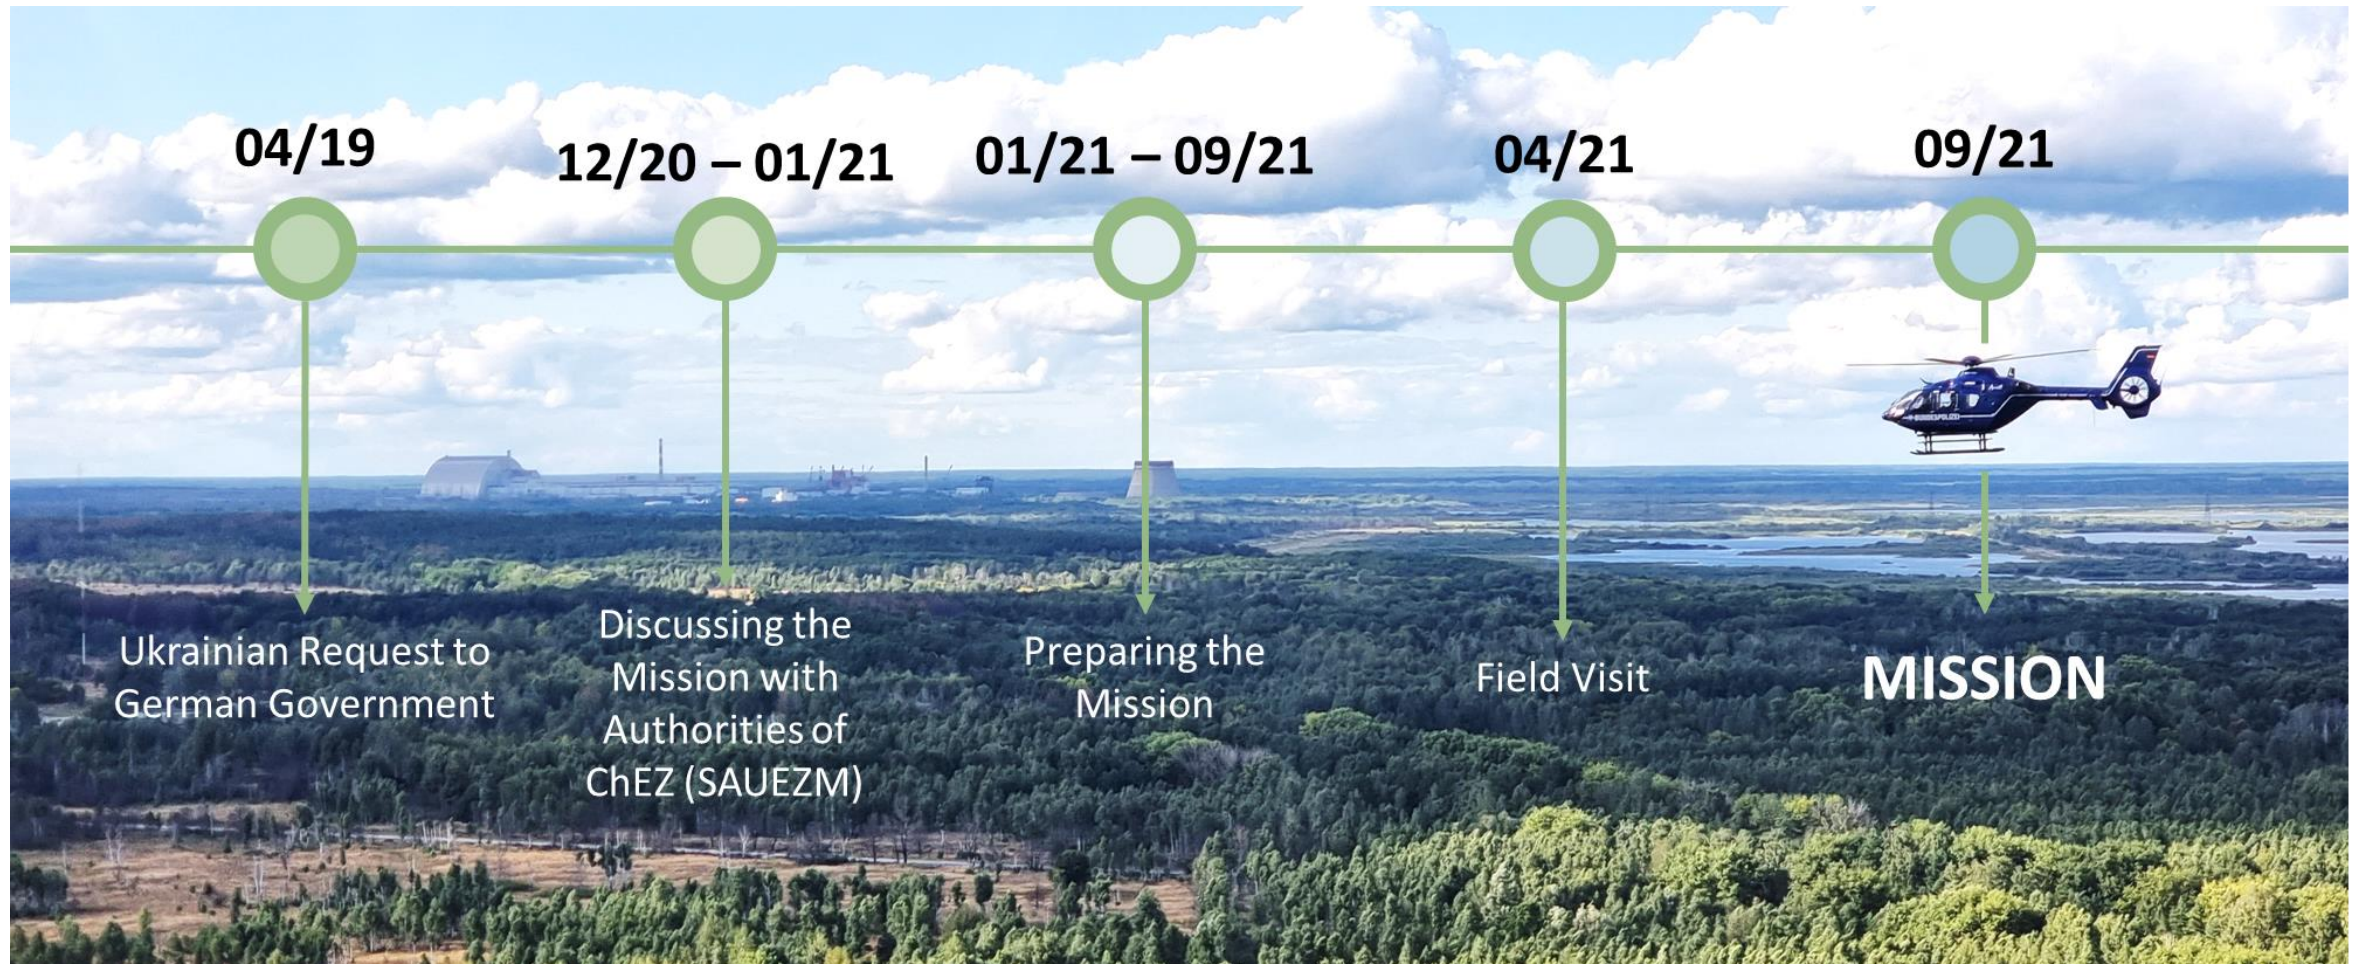

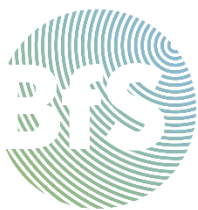

## Previous data basis

Spatial distribution of Cs-137 in 1989  
[Measurement data – Interpolation [IAEA 1991]]

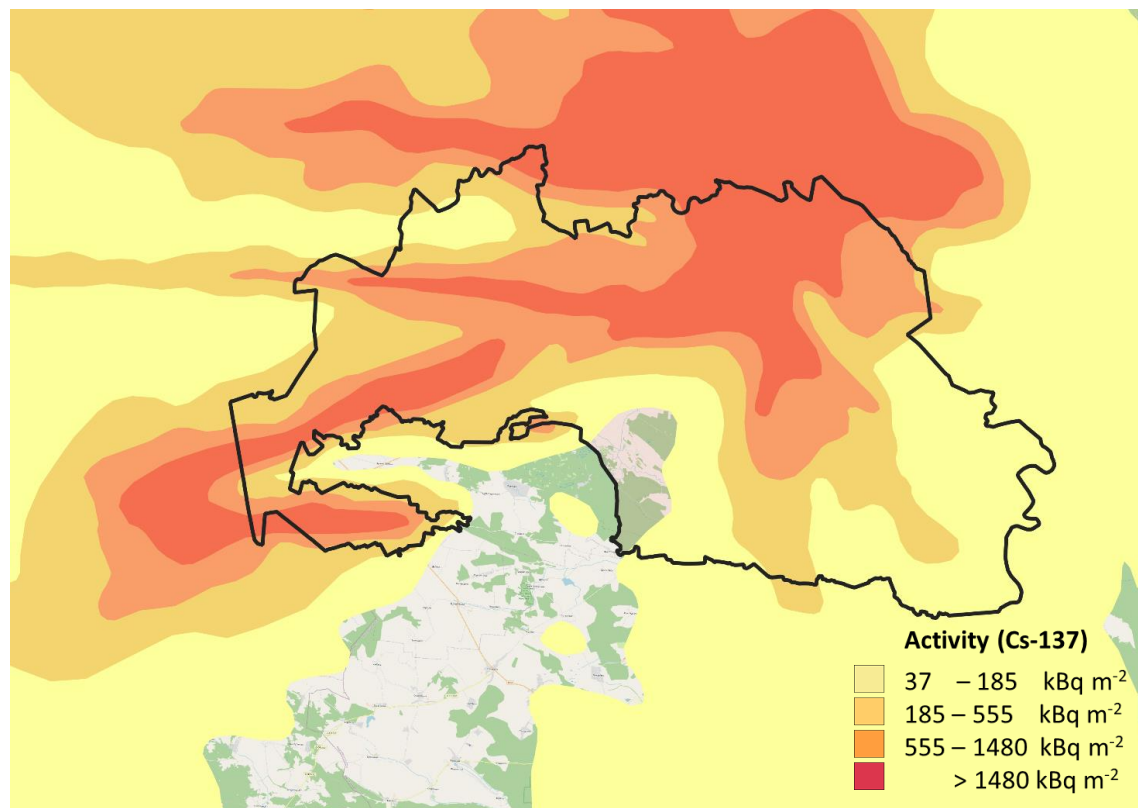

Detail mapping 1995 -1997  
(1.200 Soil samples)

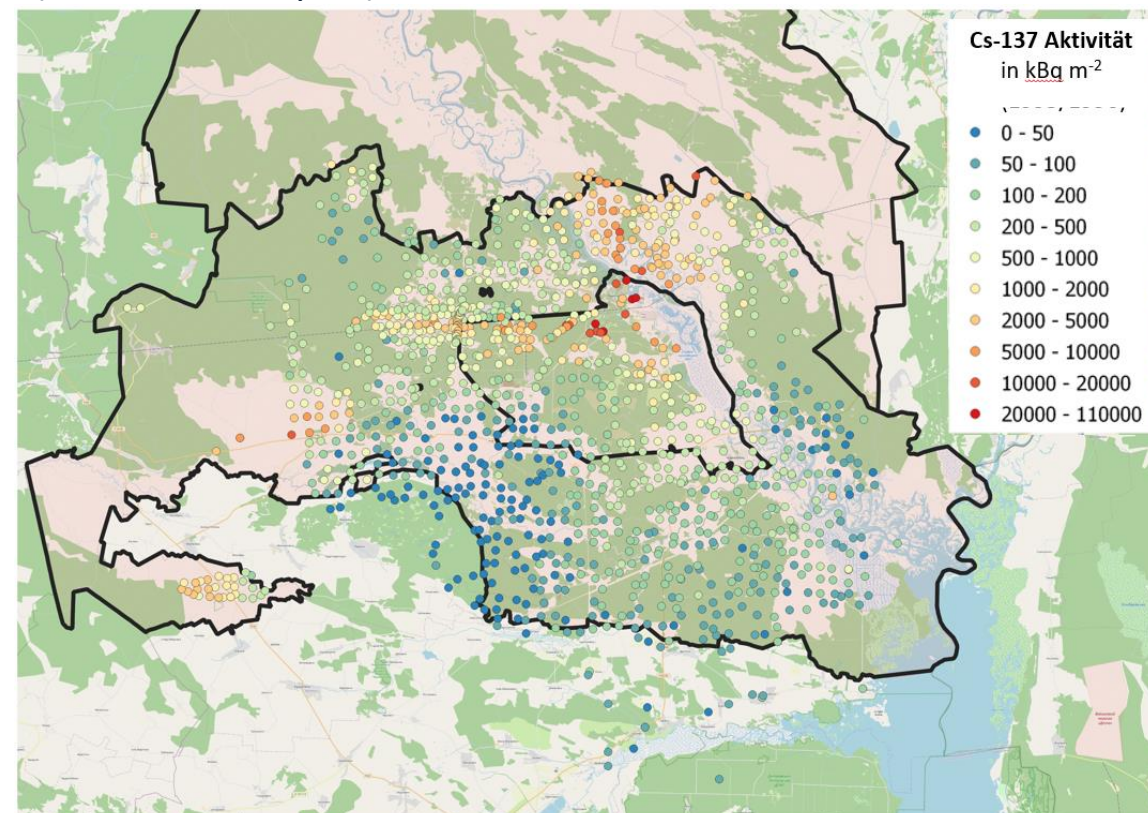



## Measurement job

Comprehensive **remapping**  
of the Ukrainian part of the exclusion zone

**Total area** 2.600 km<sup>2</sup>

**Measurement duration** 10 Flight days

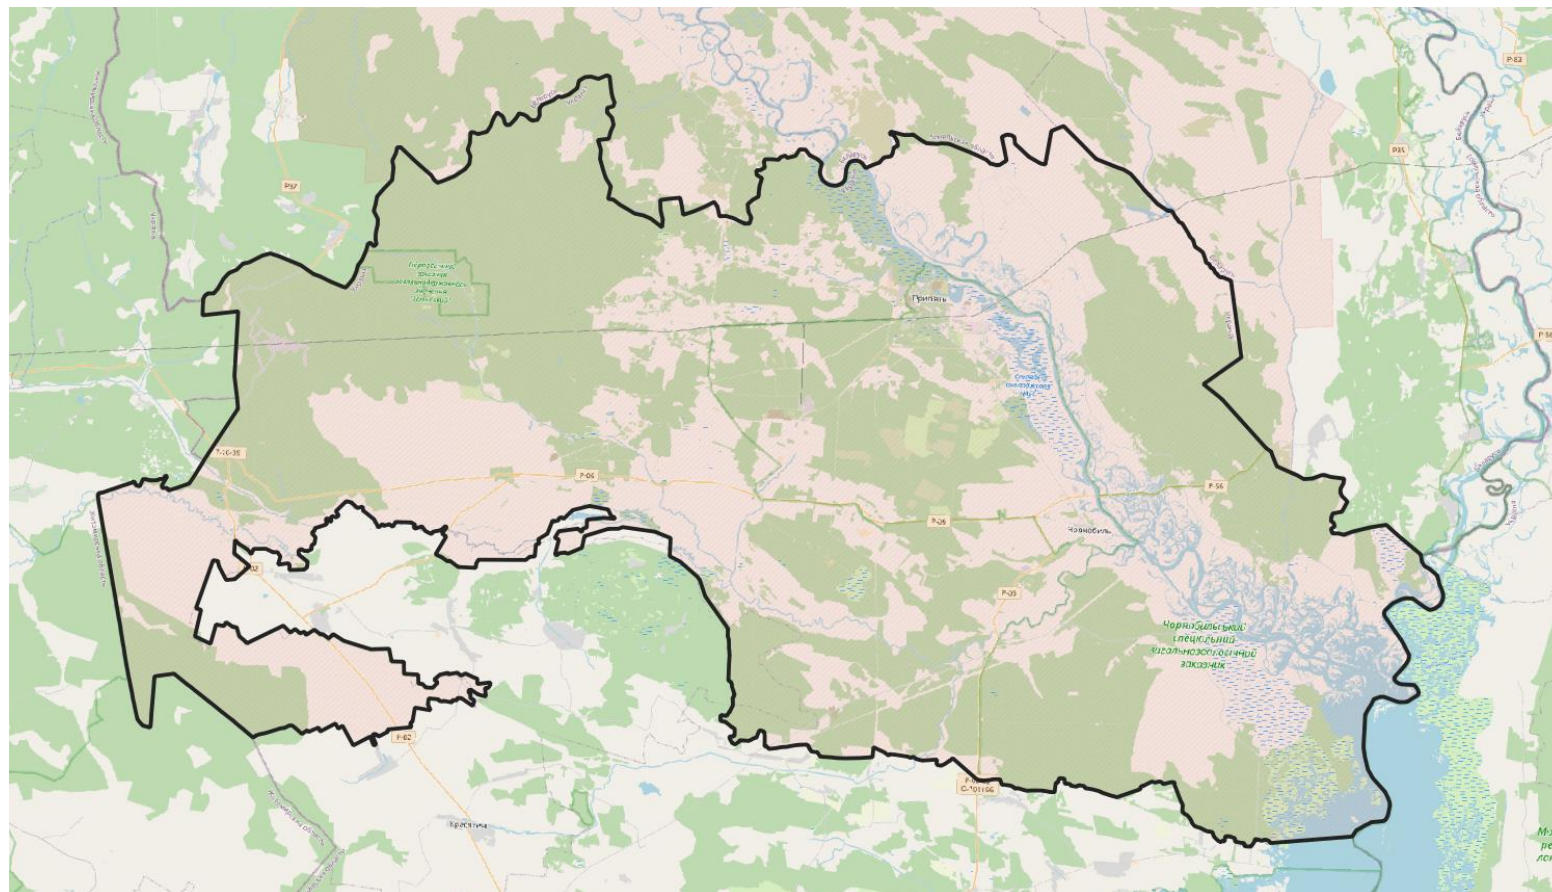

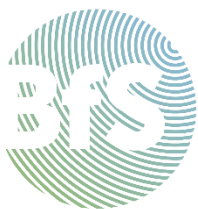

Applied radiation protection § 161 StrlSchG  
§ 1 IMIS-ZustV

## Measuring system - cooperation with the Federal Police

Measurement- and analysis software (BfS)    Measurement technology (BfS)

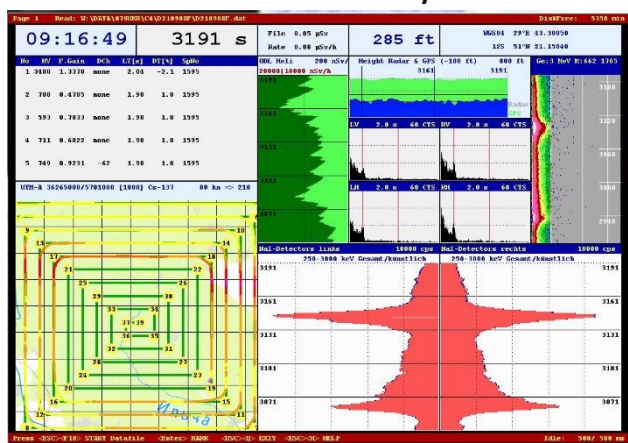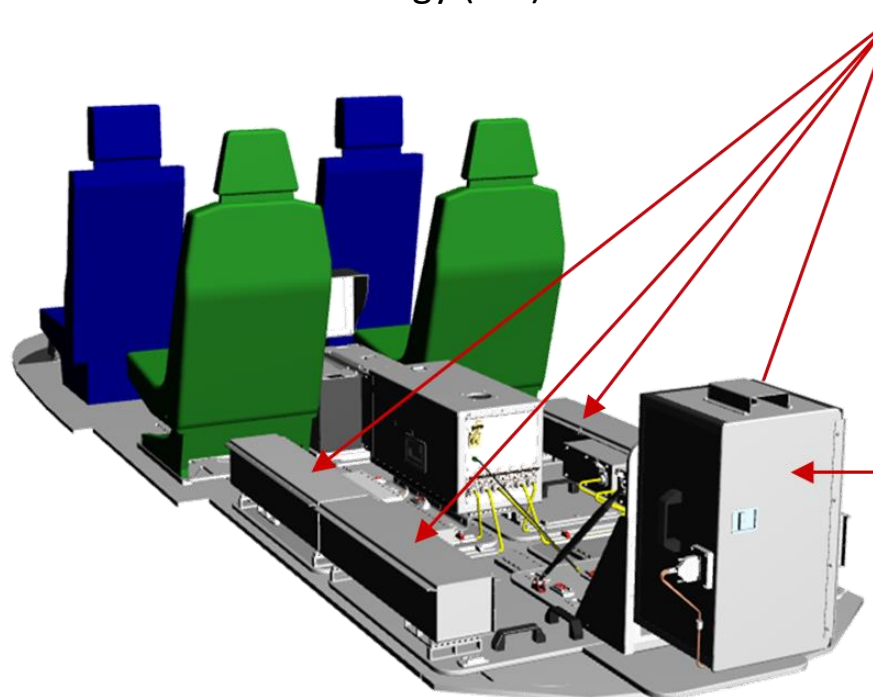

### 4 Szintillationsdetektoren NaI(Tl)

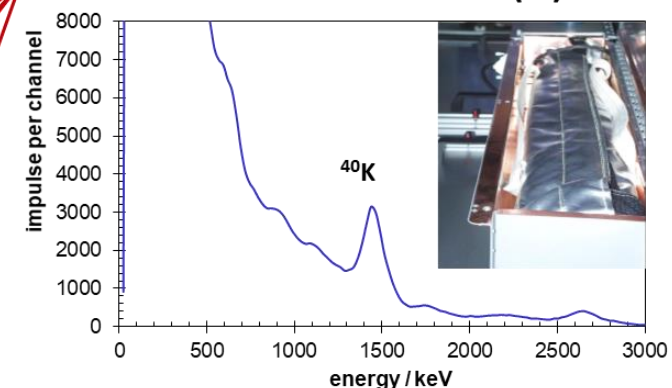

### 1 Halbleiterdetektor HPGe

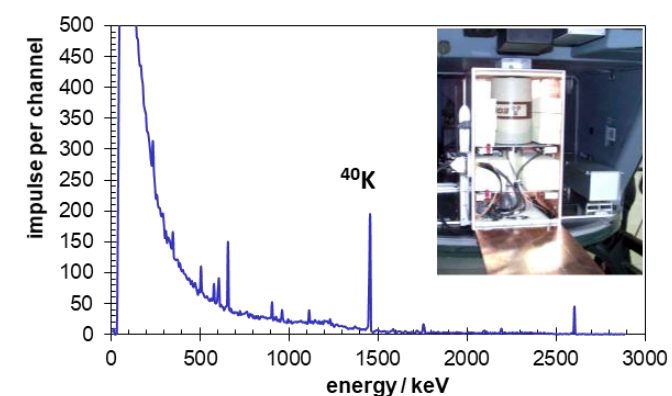

### Helicopter (Federal Police)

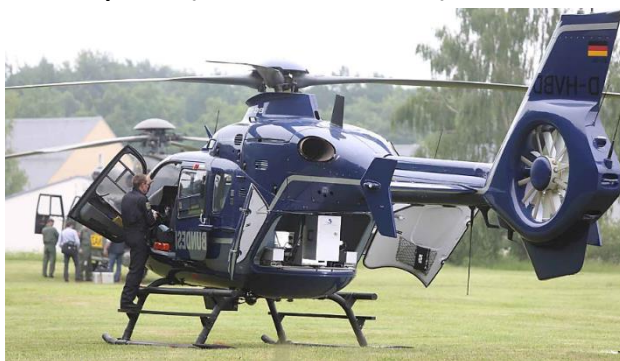

## Measuring system - visual range

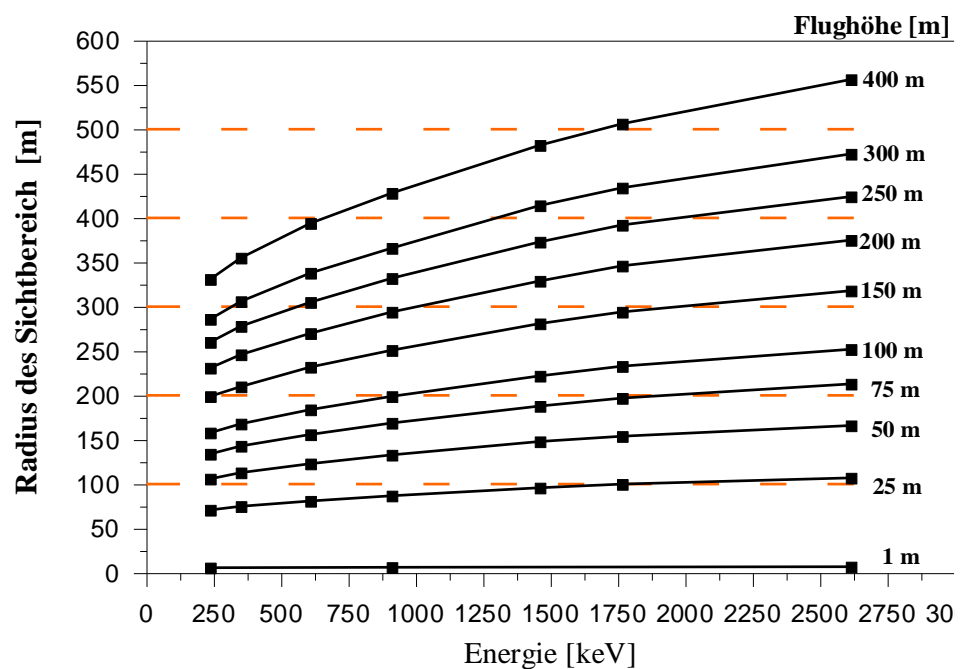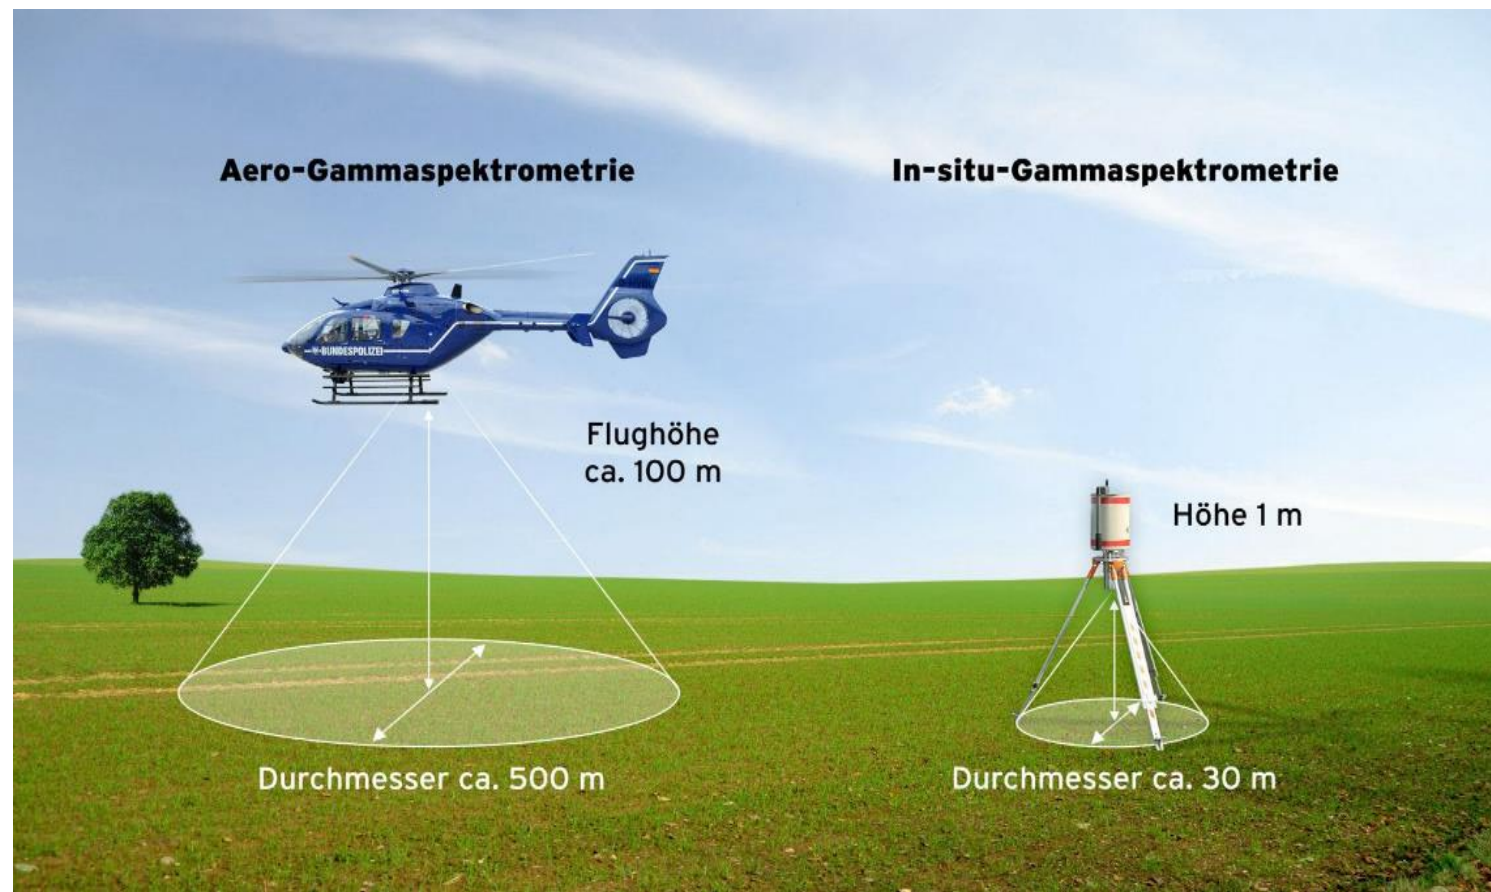



Bundesamt  
für Strahlenschutz

## Measurement expertise in helicopter measurements

European Network – CH/F/CZ/D

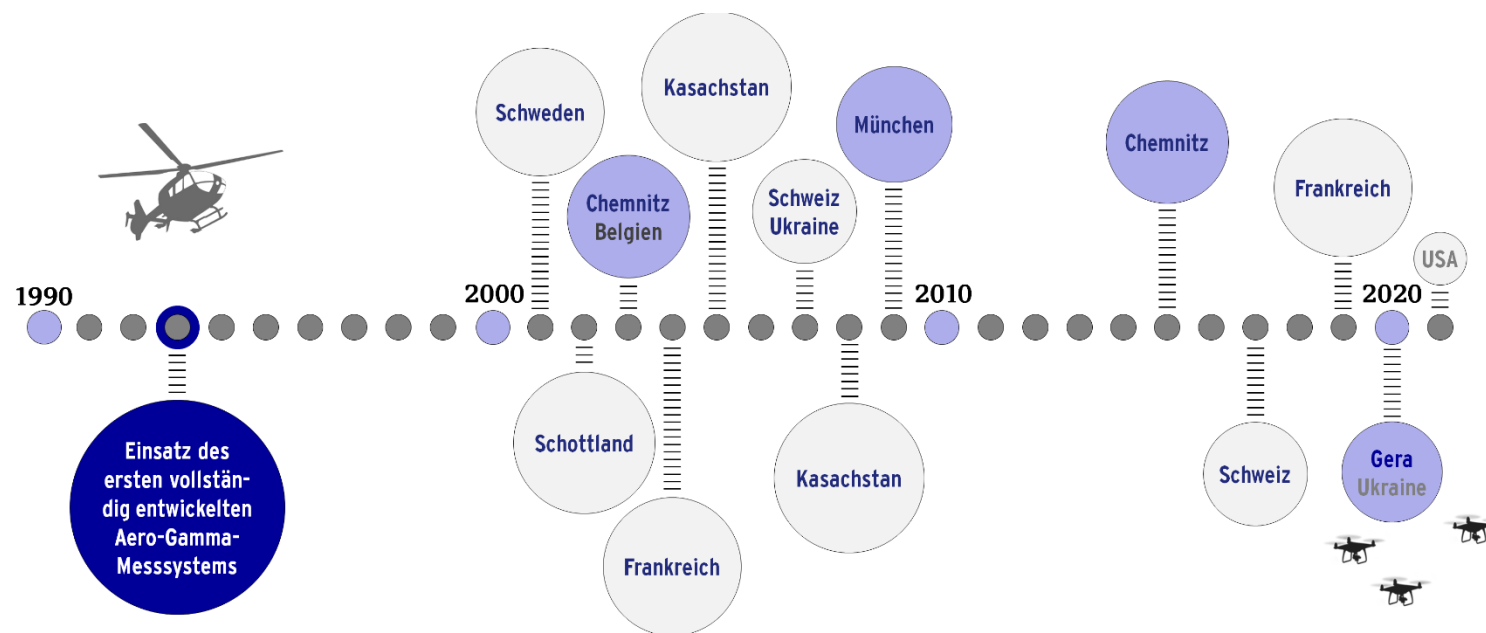

Radiation exposure in the Chernobyl area - then and now

Seite 7

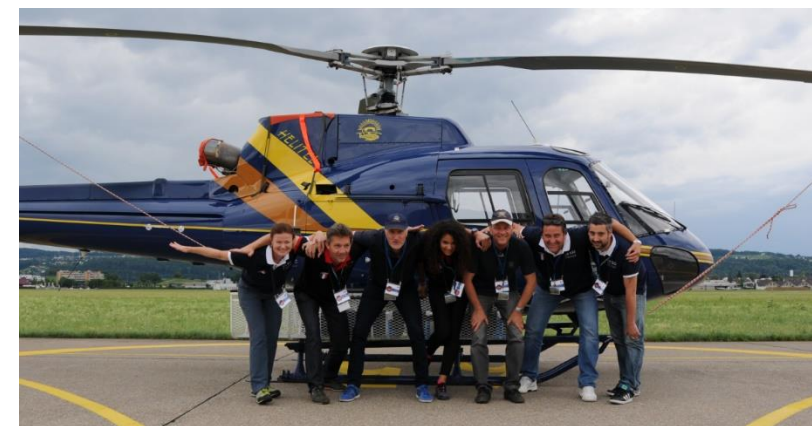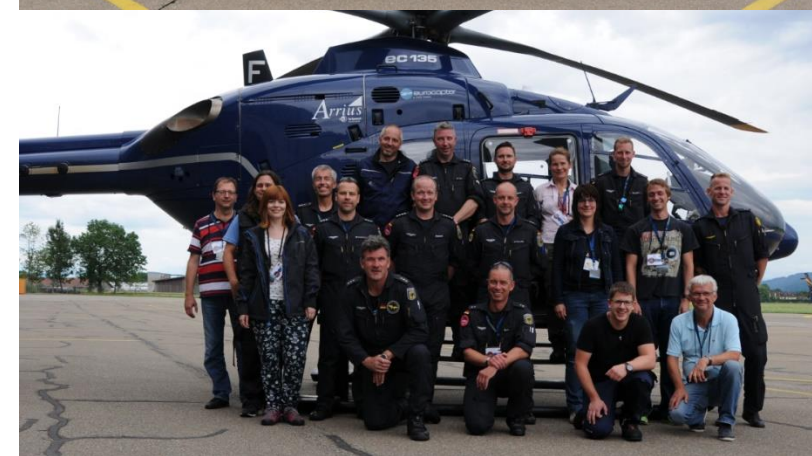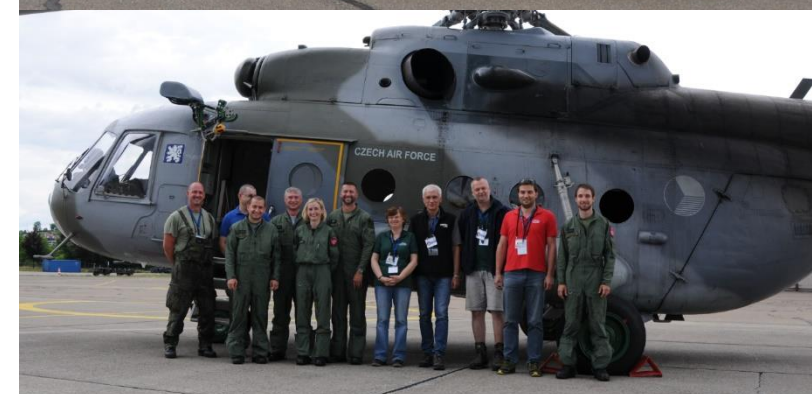



## Measurement campaign - Logistics challenges

**Airfield**

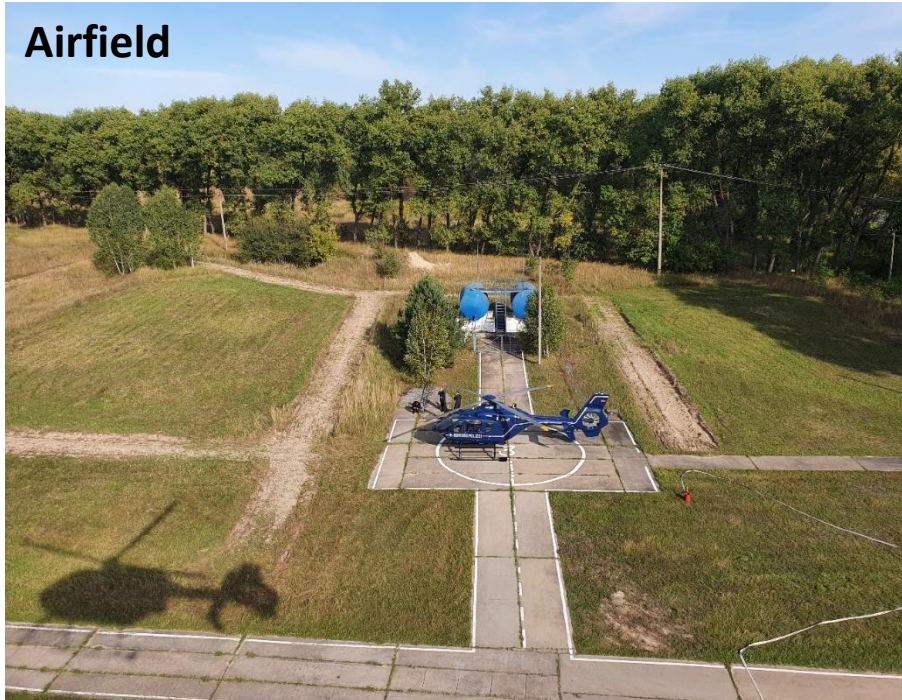

**Fuel**

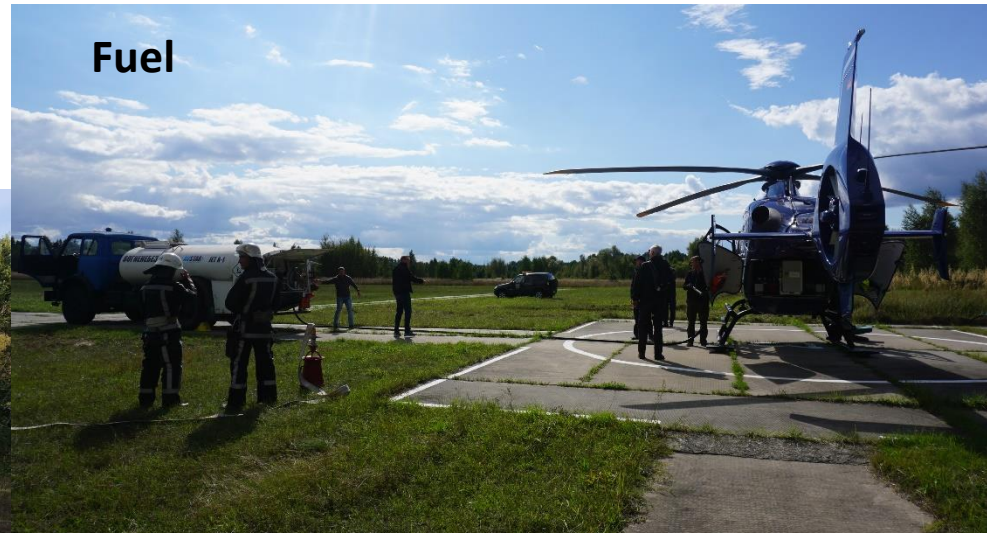

**Firefighters**

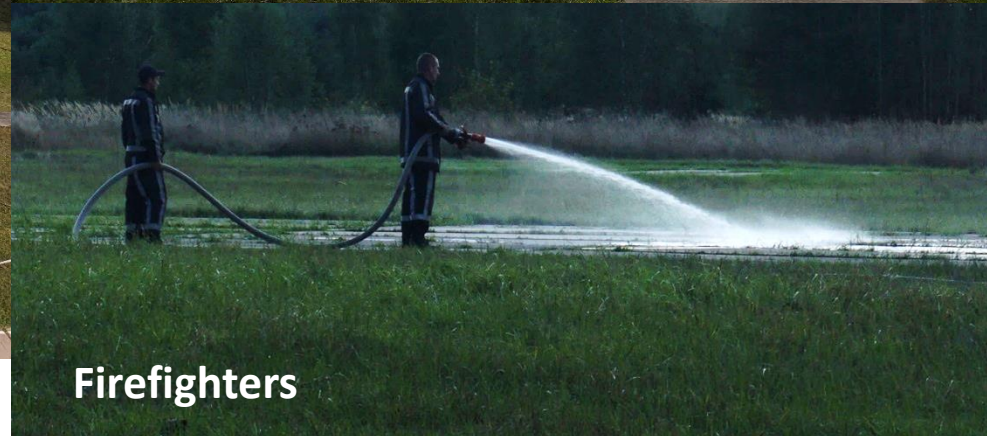



## Measurement campaign - Logistics challenges

### Helicopter alternate landing pads

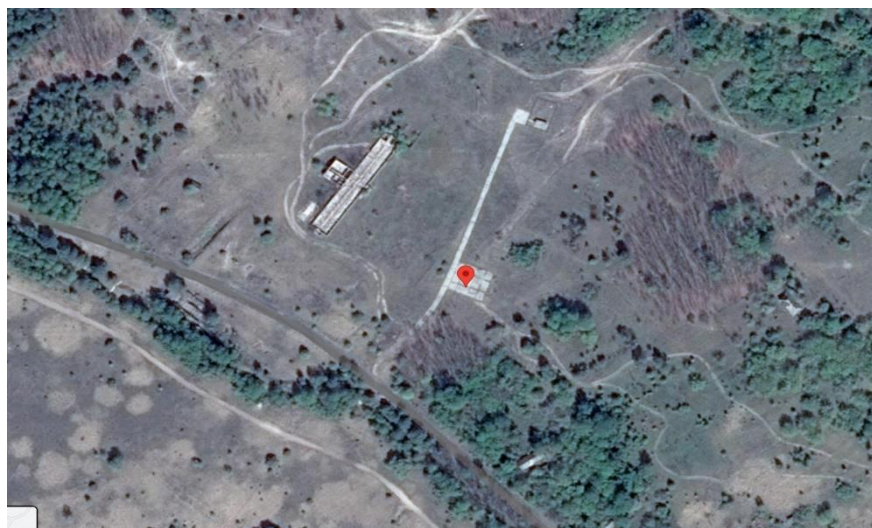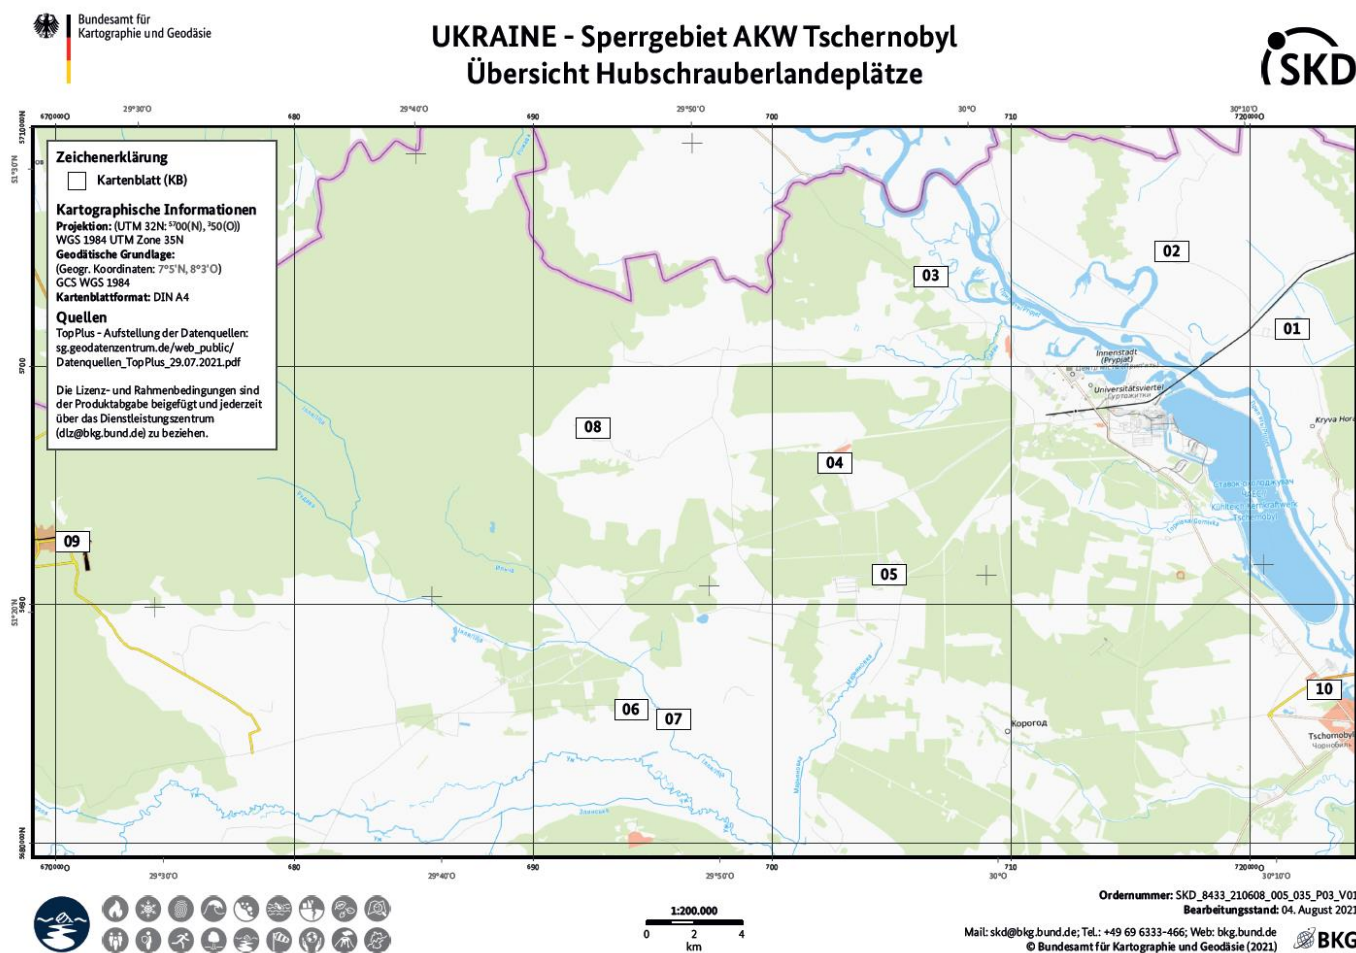

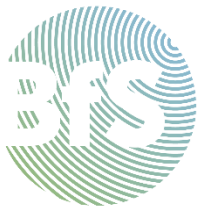

## Measurement results

airborne measurements

max. coverage **97 %**

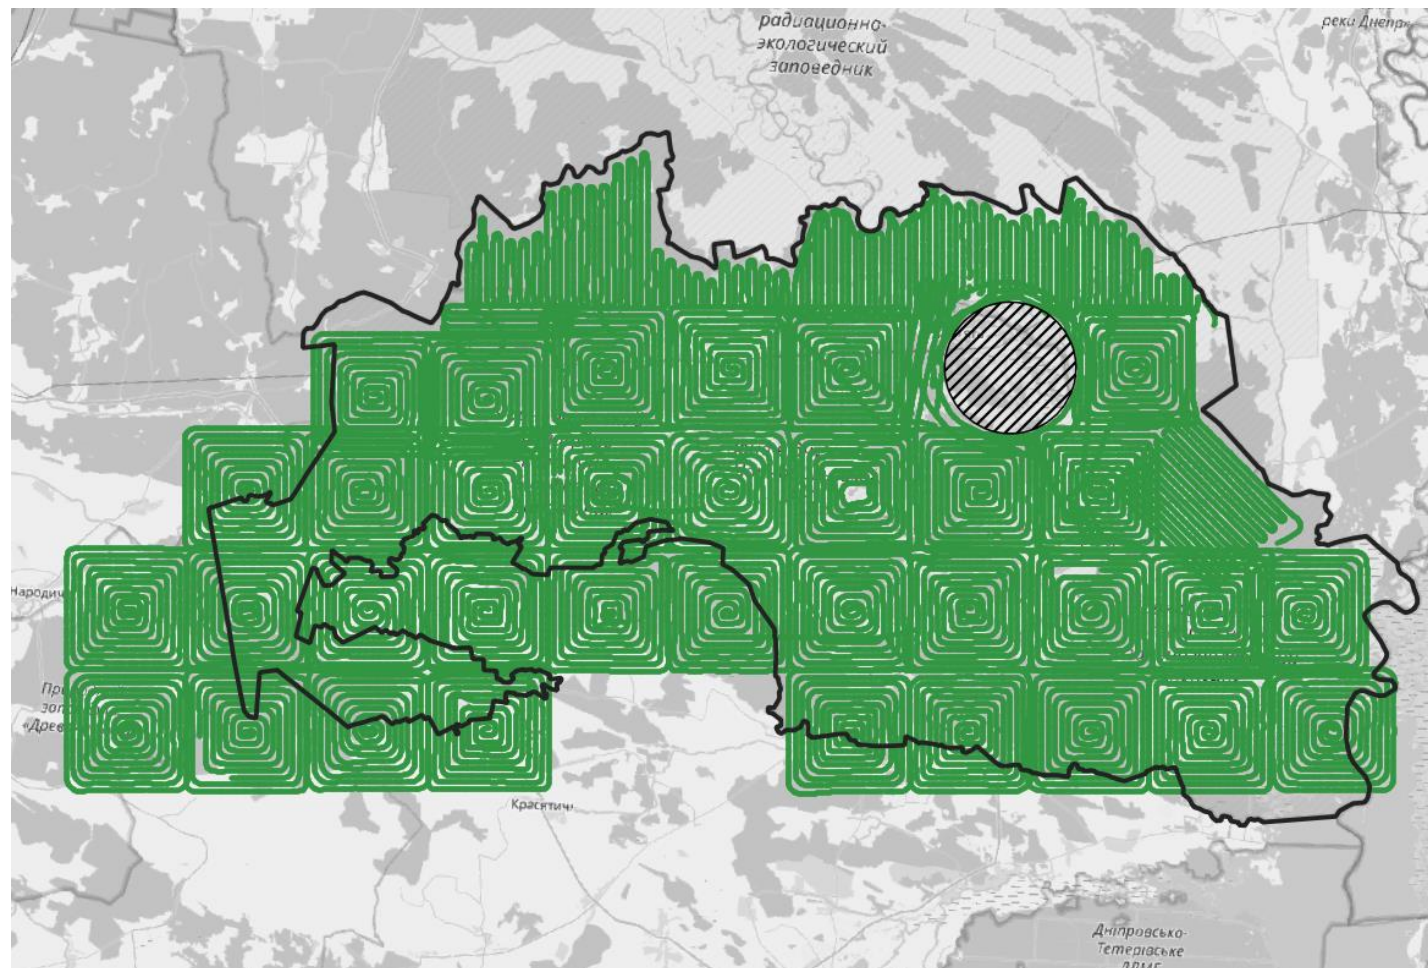



## Measurement results

### airborne measurements

$^{154}\text{Eu}$  (HWZ 8,6 a)

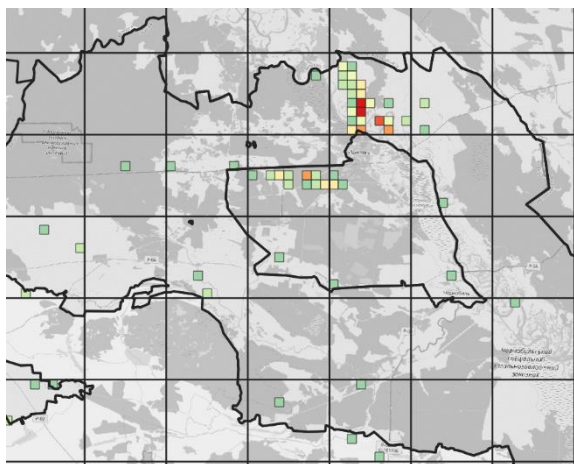

$^{137}\text{Cs}$  (HWZ 30,19 a)

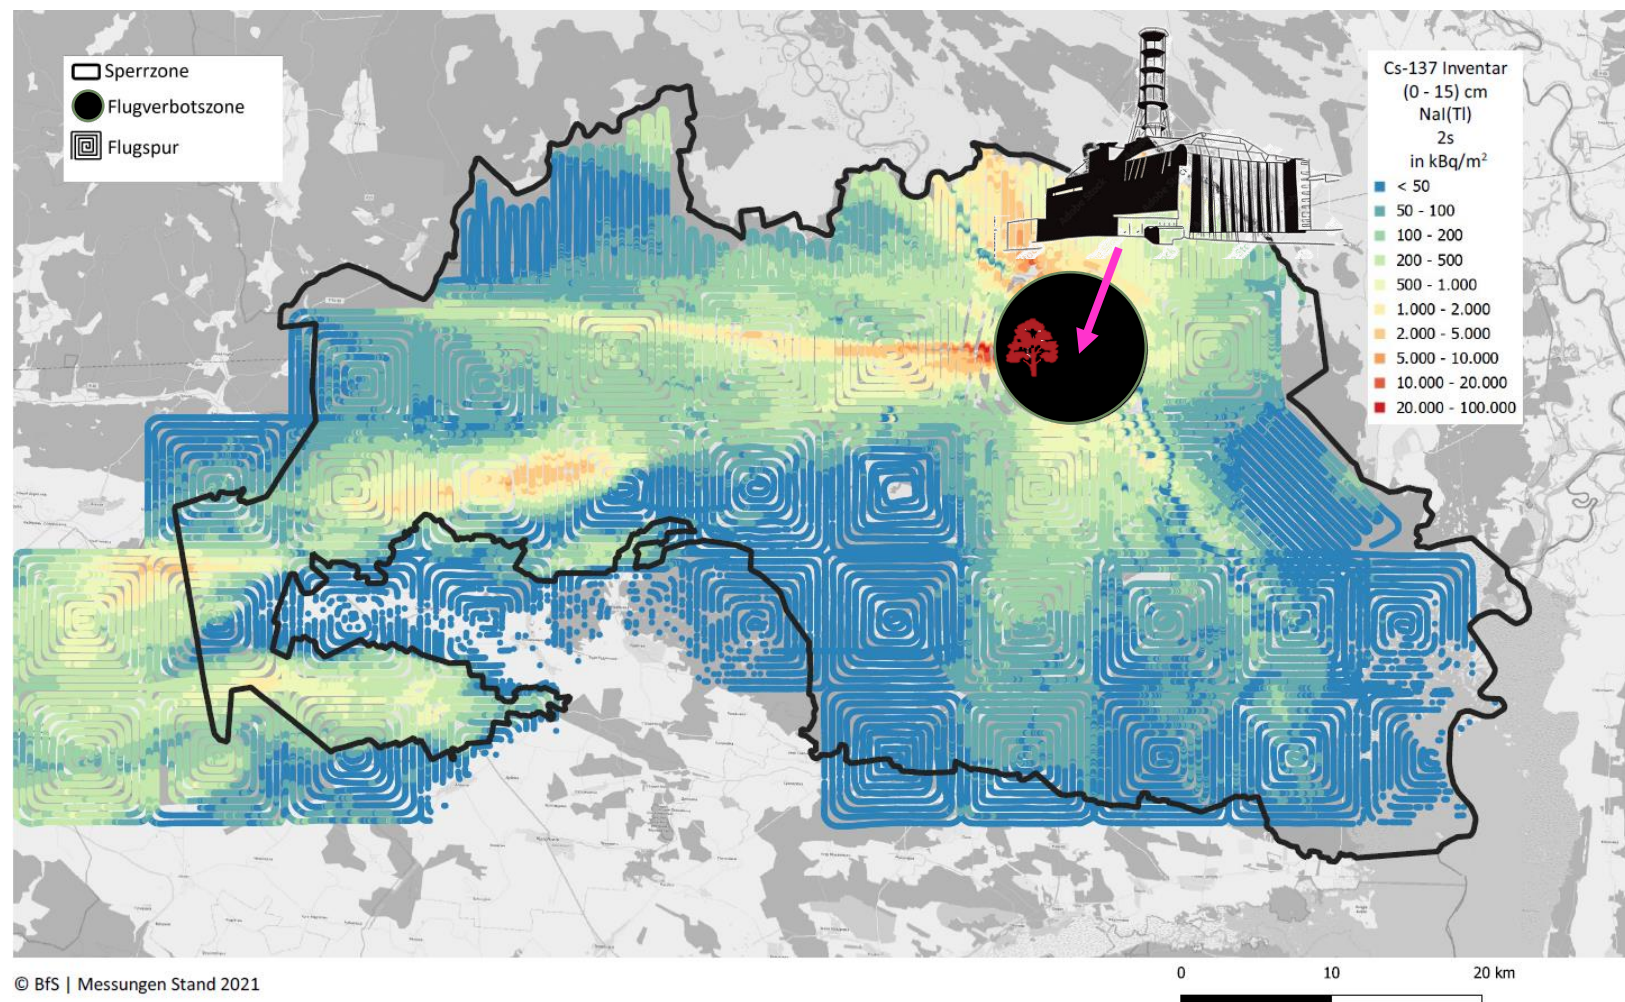



## Measurement results - maximum value

0,1 mSv/h

Red Forest

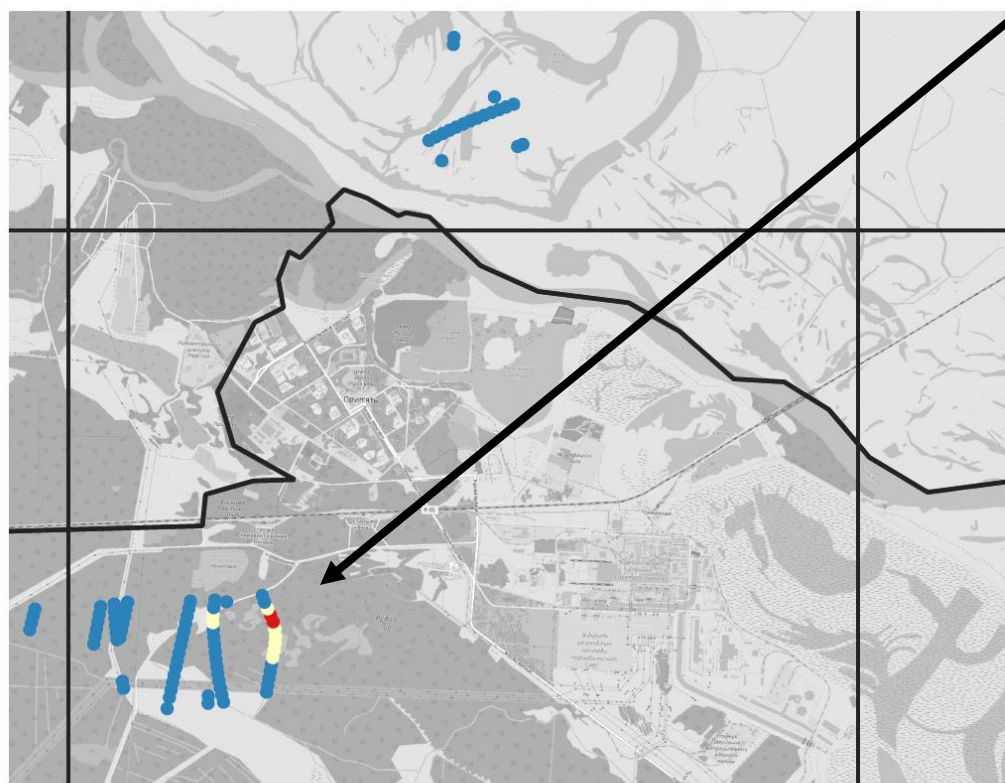

ODL  
NaI(Tl)  
2 s  
nSv/h

- 10000 - 50000
- 50000 - 100000
- 100000 - 112000

UAV Measurements  
Molitor et al. 2018

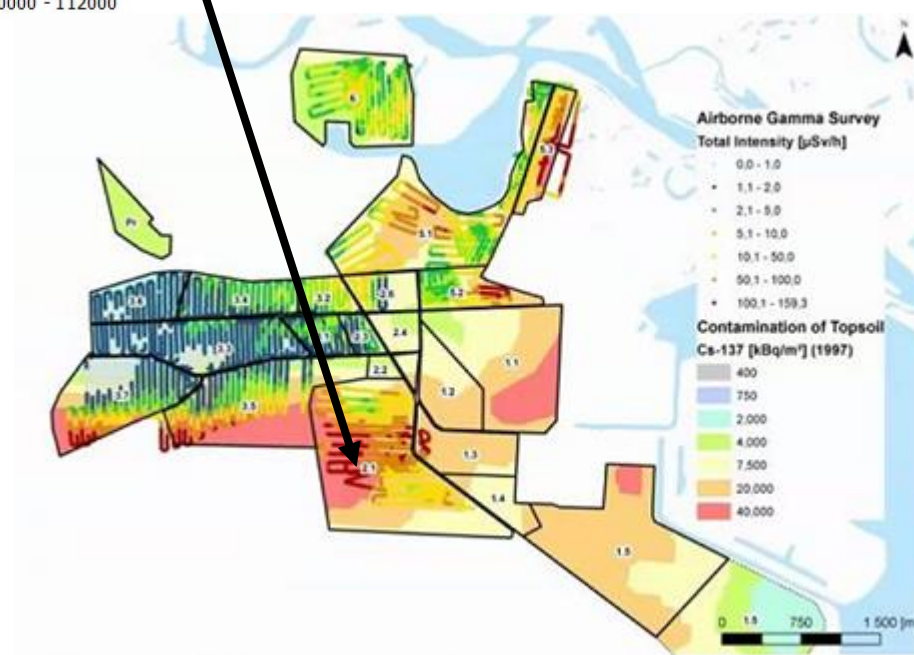



## Measurement mission

ground-based measurements

at a total of **183**  
measurement sites

Goal: **Quality assurance** of the  
helicopter-based  
measurements

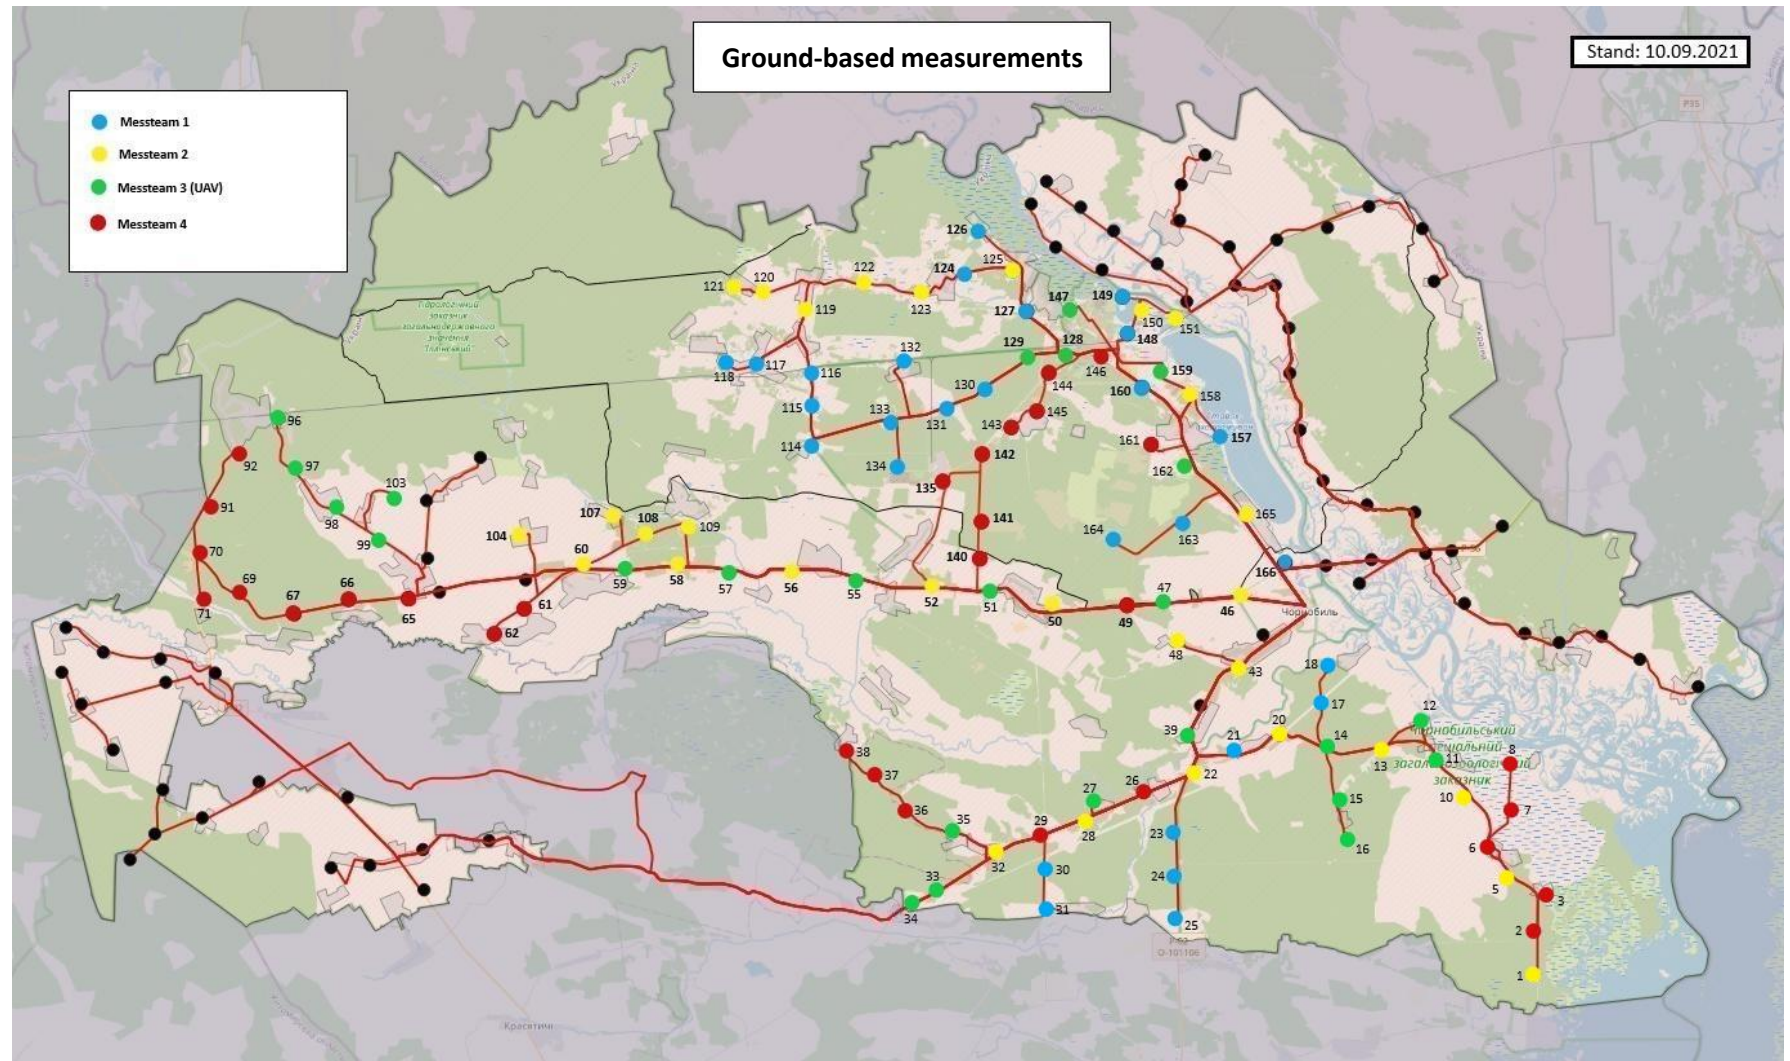



## Bundling of different measuring methods and cooperation with the Ukrainian LABORATORY of ECOCENTRE

Vehicle based measurements

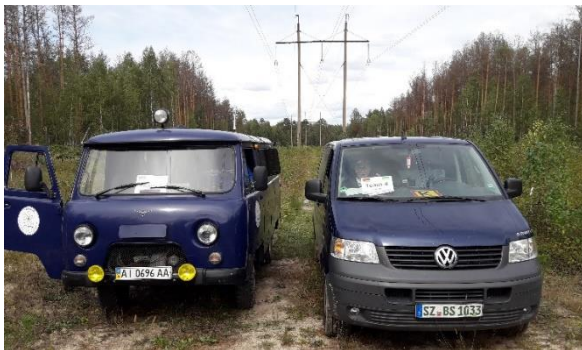

Reference areas

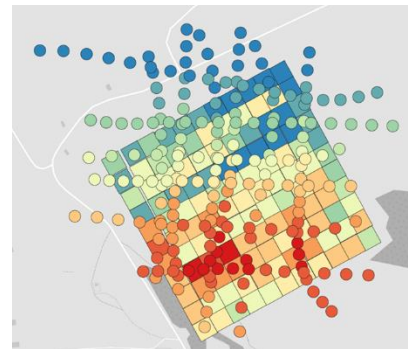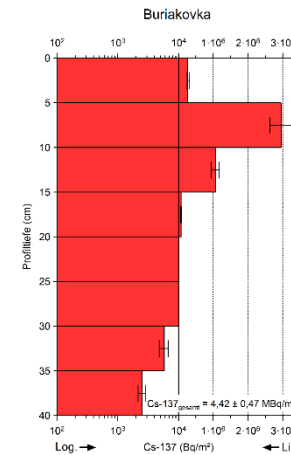

In situ gamma spectrometry

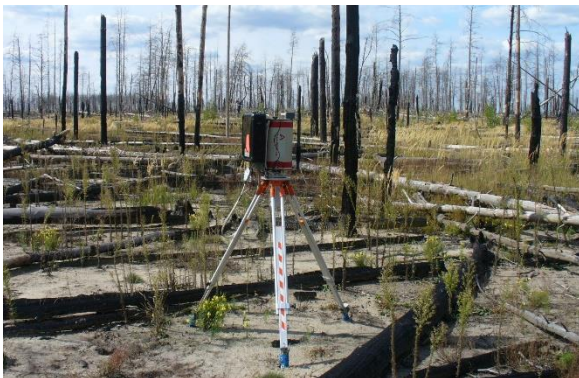

Ground profiles

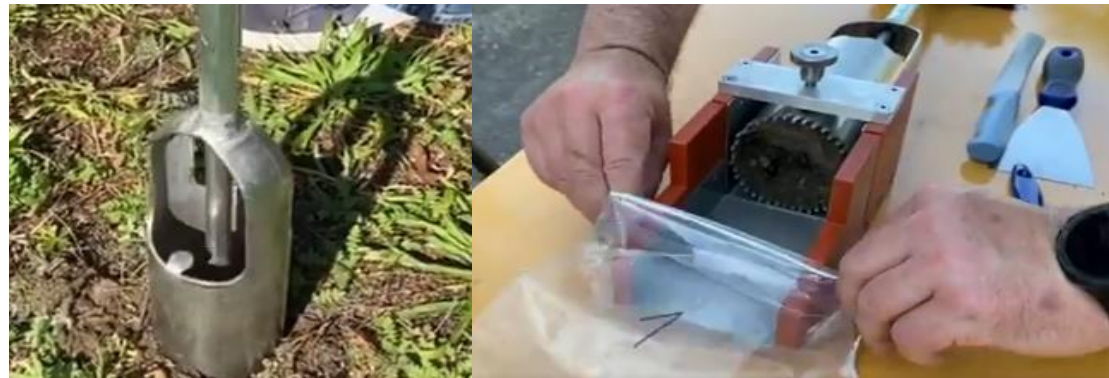

Lab in the exclusion zone - March 2022

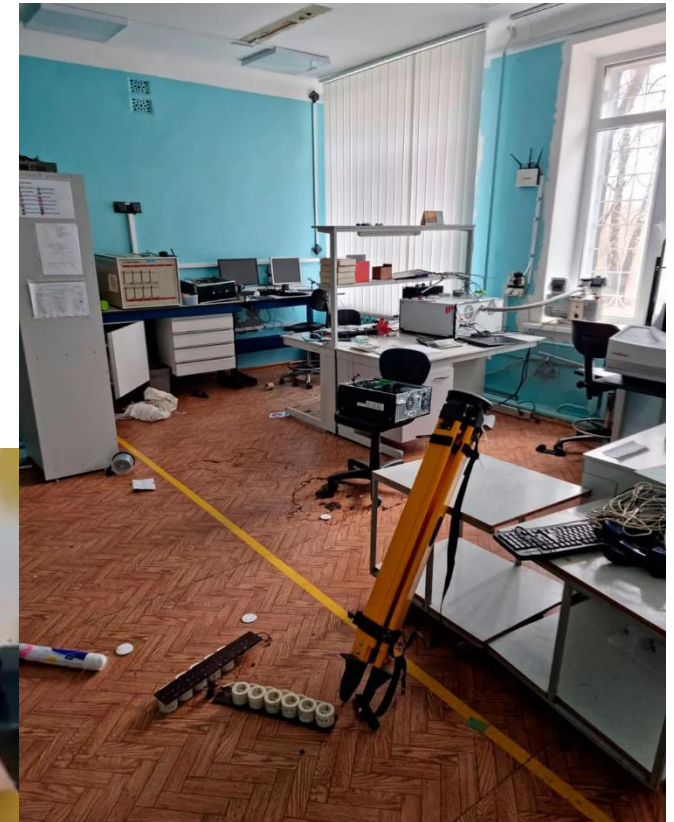



## Measurement results - consideration of geometrical factor

$$\text{Ratio} = \frac{\text{Cs-137 Inventory (Air)}}{\text{Cs-137 Inventory (ISM)}}$$

### Cs-137 Inventory (Air) and calculated Ratio

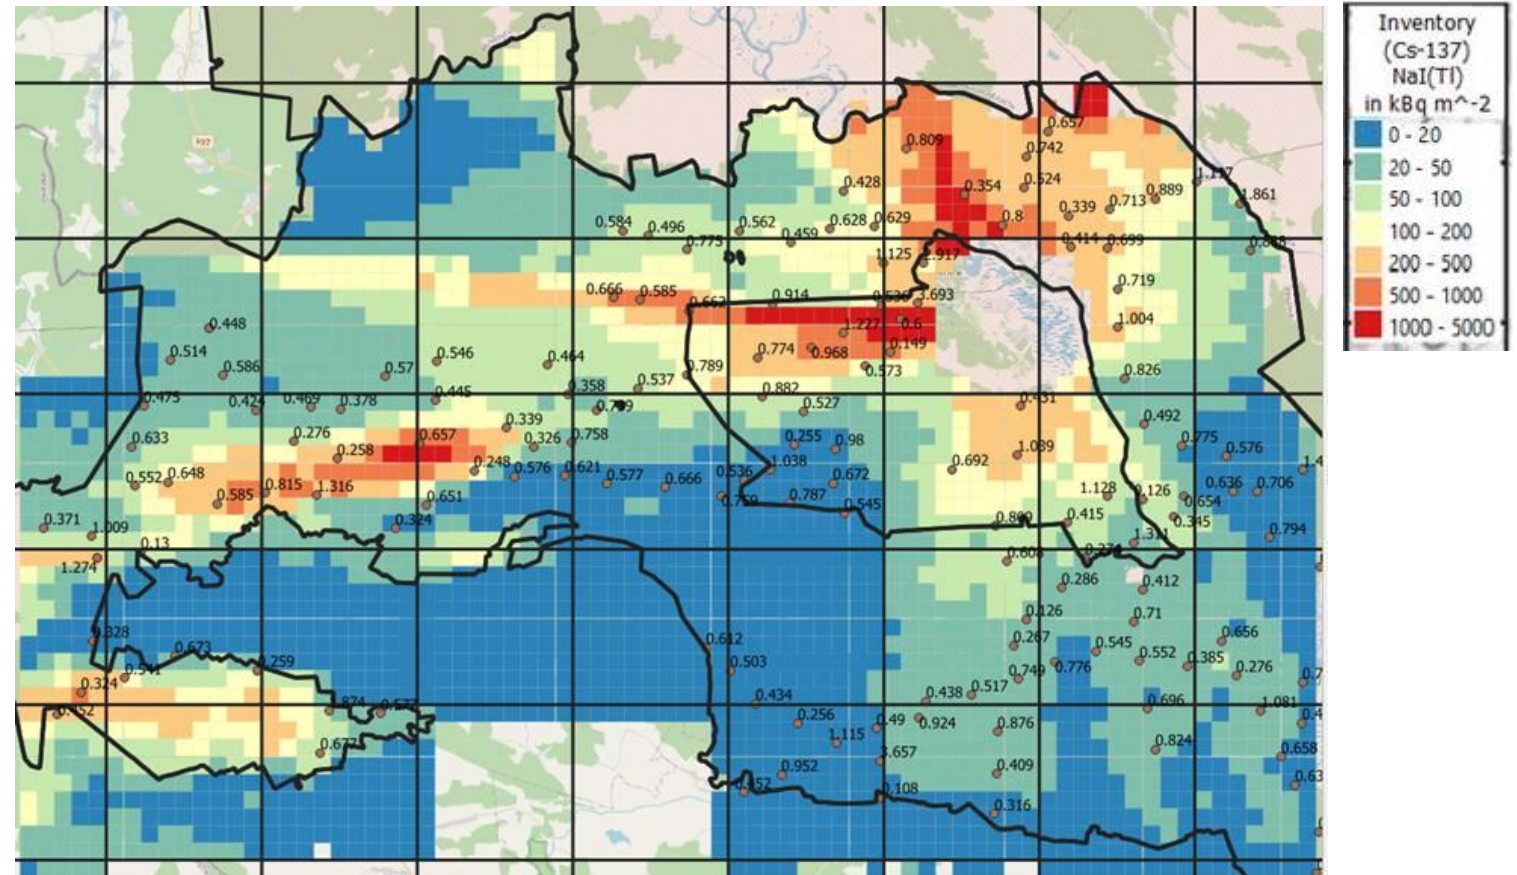

## Radioecological models

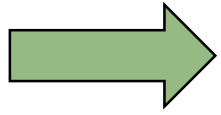

Scientific studies on the transport  
processes of radioactive  
substances in environmental media

## Examples of contamination and exposure pathways for airborne discharges

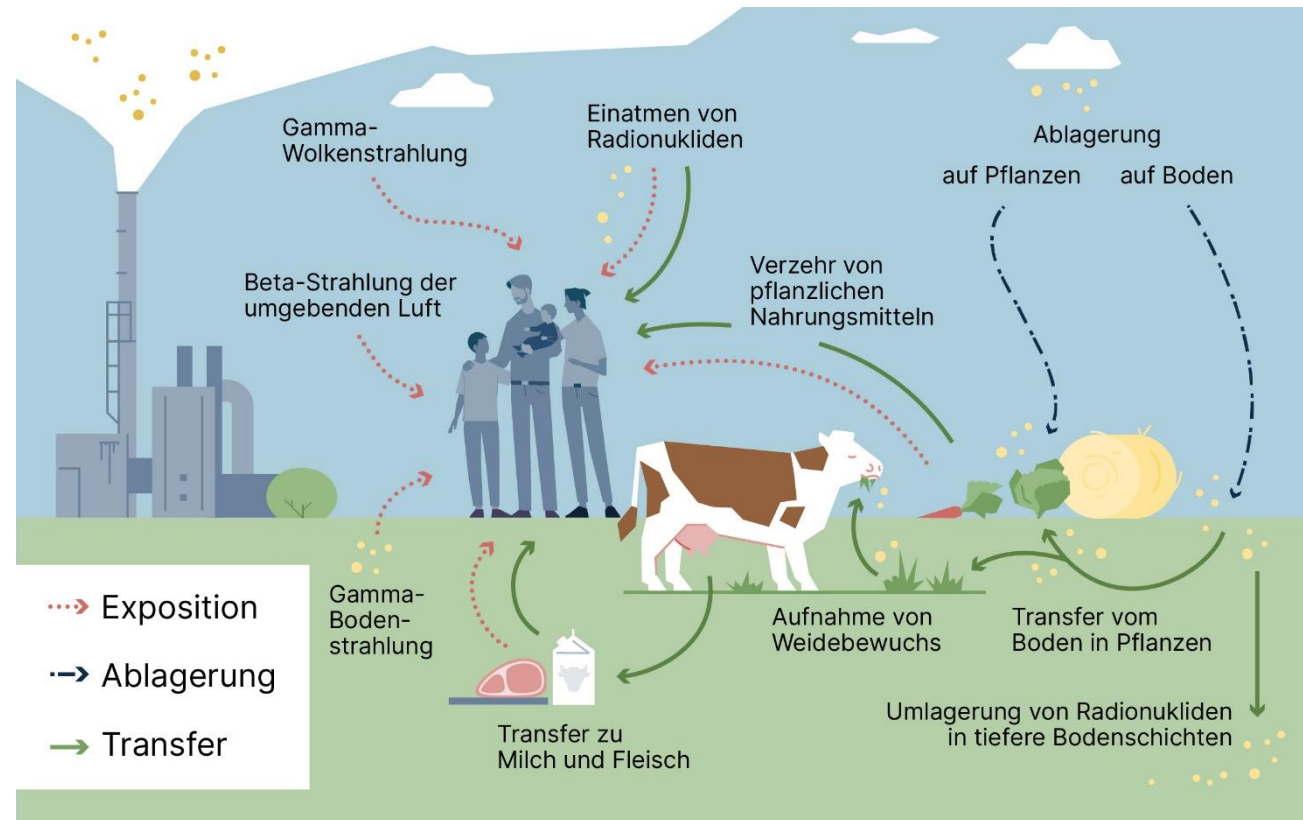



## Interpretation - measurement results

Back calculation of the measured values to 1989

IAEA Publication 1991

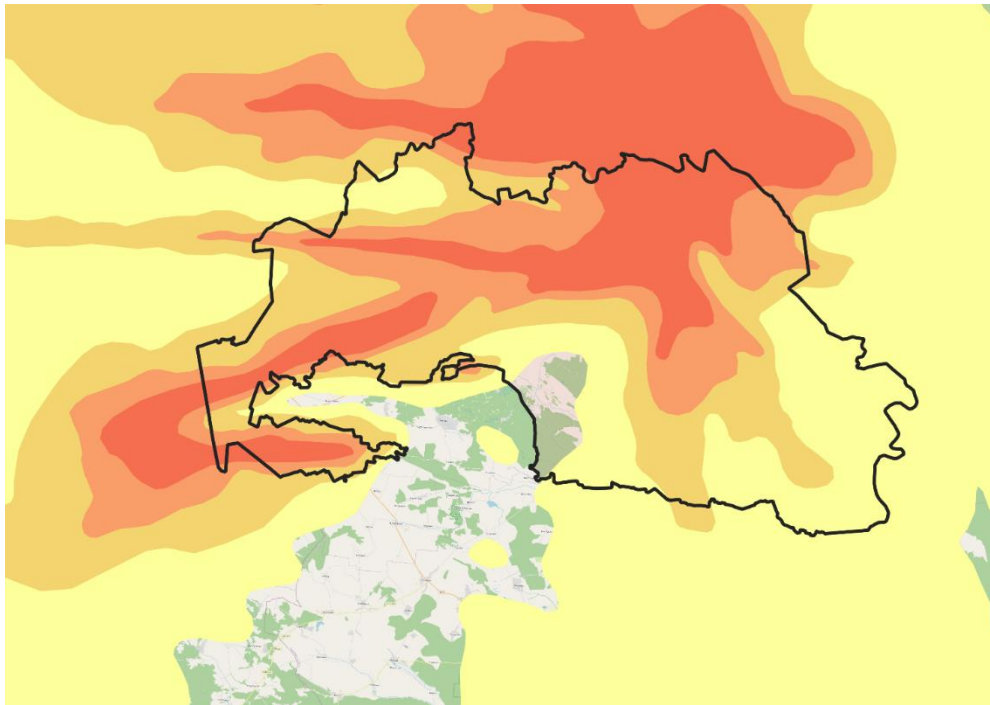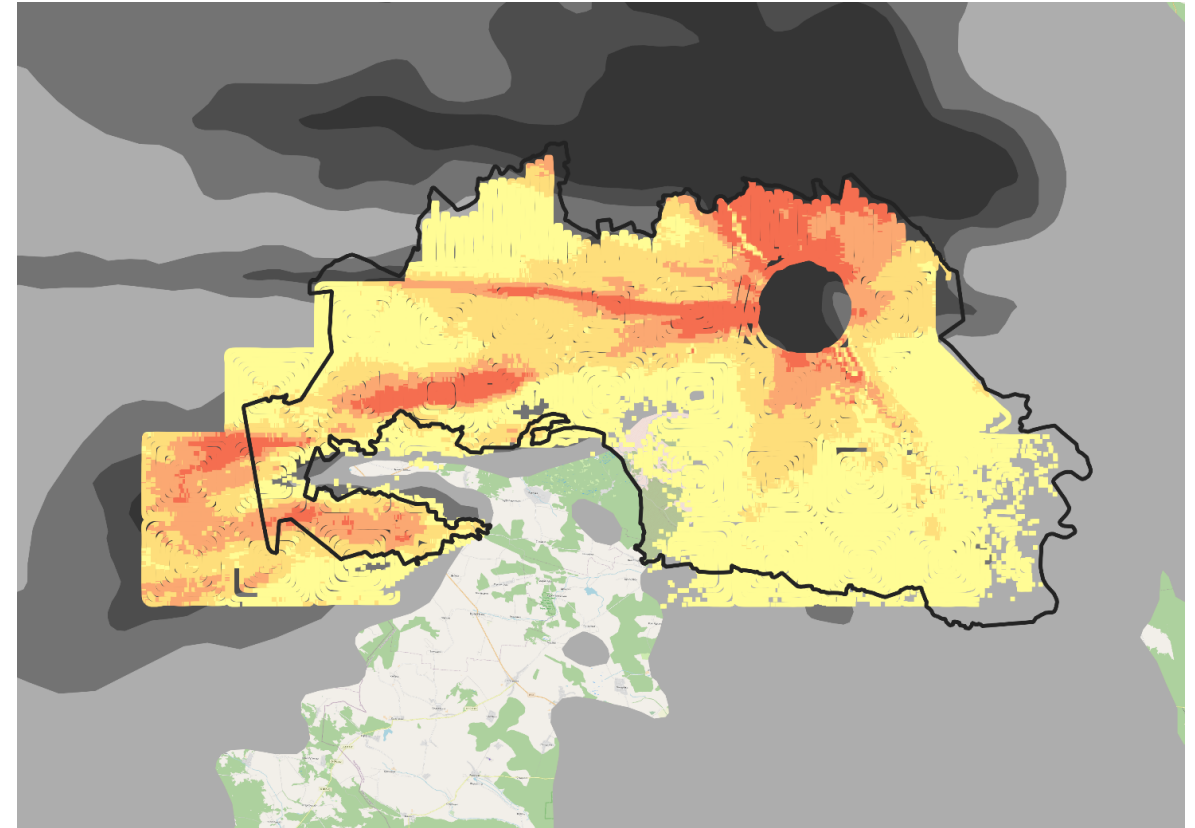

Activity (Cs-137)

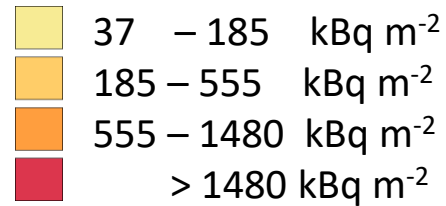

Measurement campaign 2021

# Geographic Information System

## Comparing the measured values with QGIS

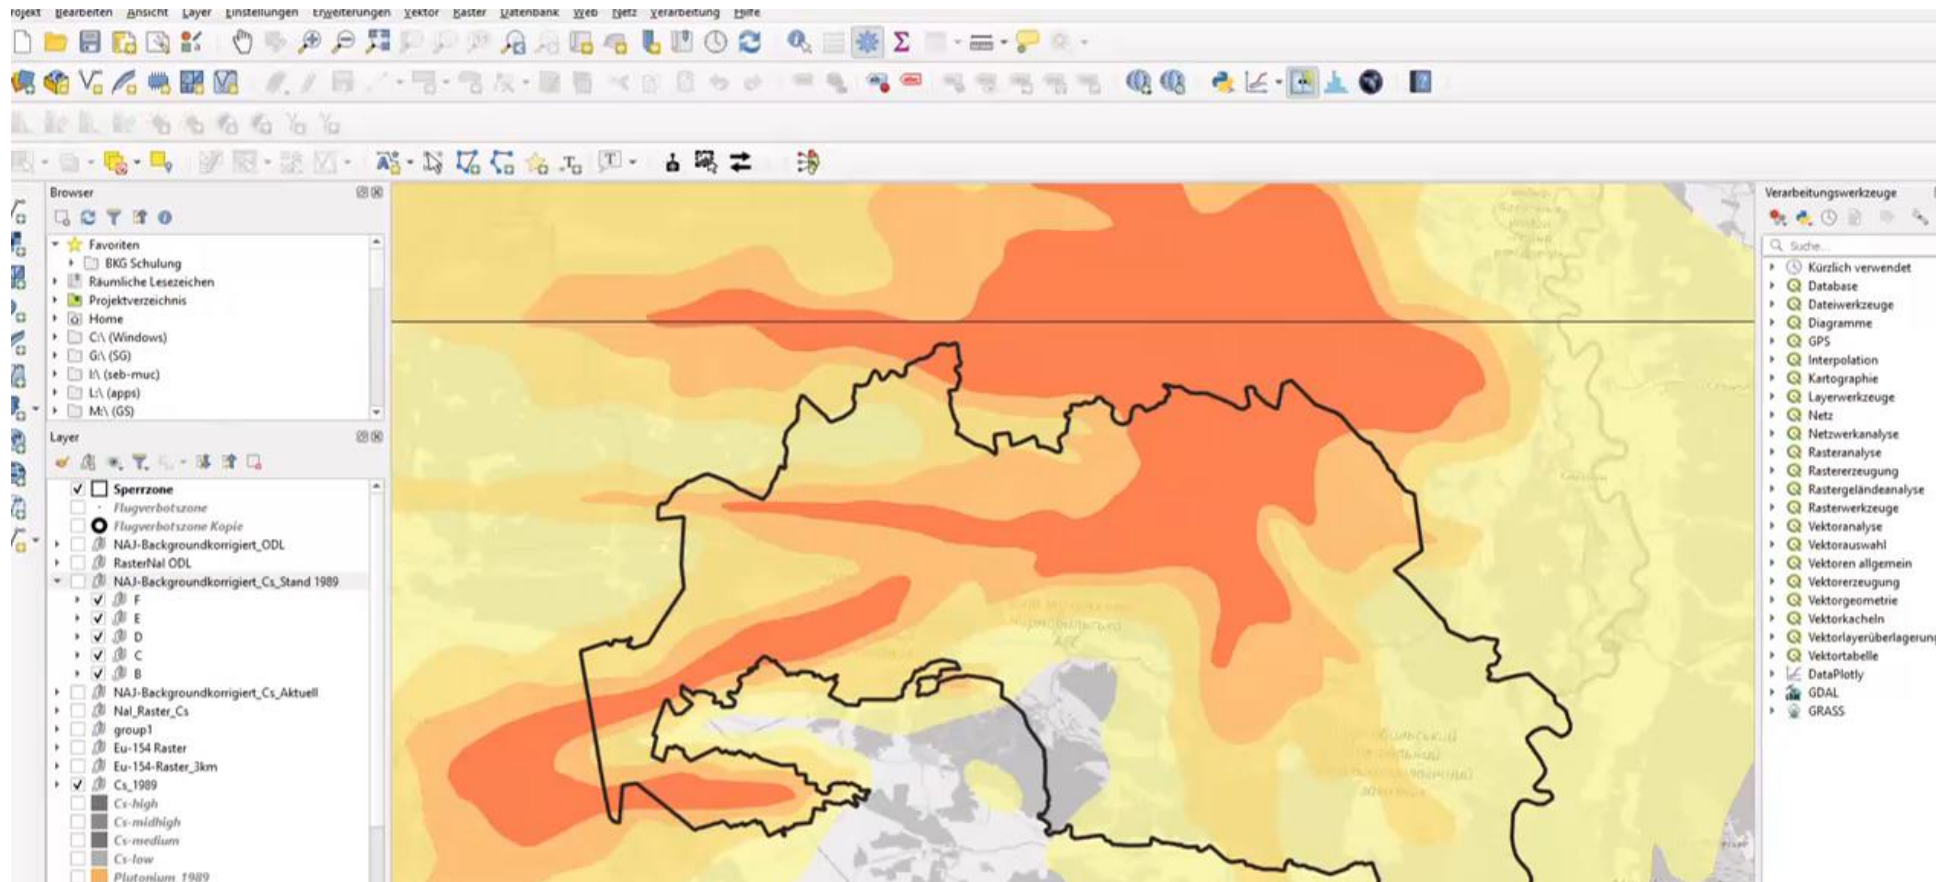



## Radioactive waste vector complex

### Restricted flight zones

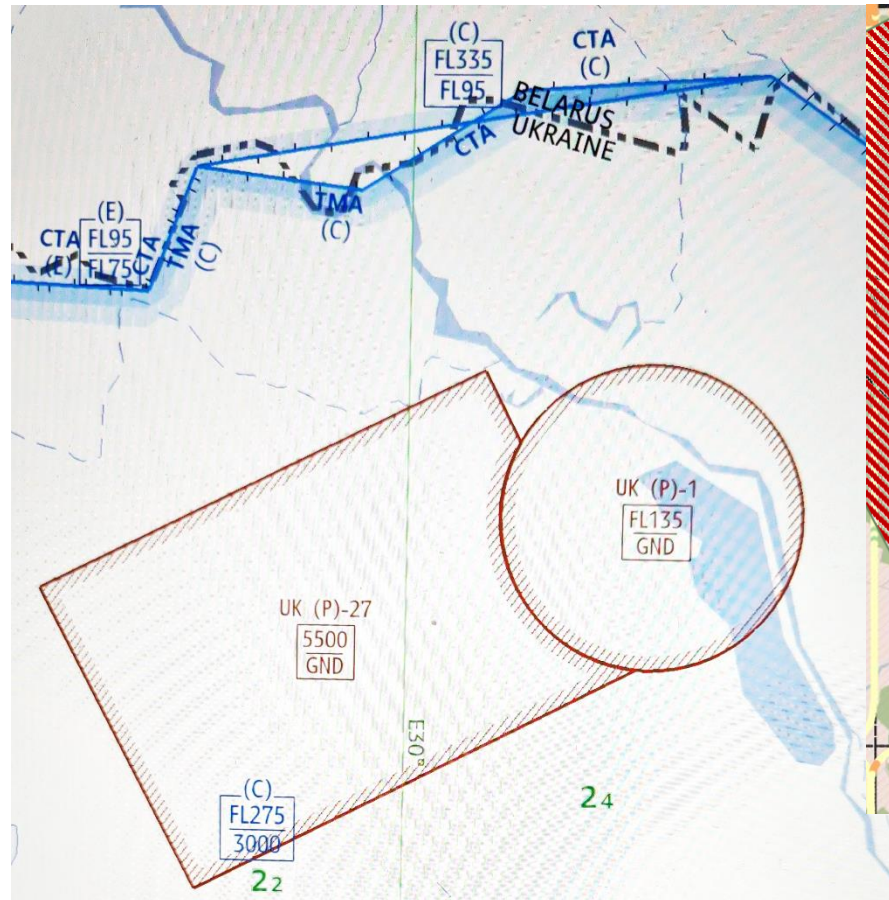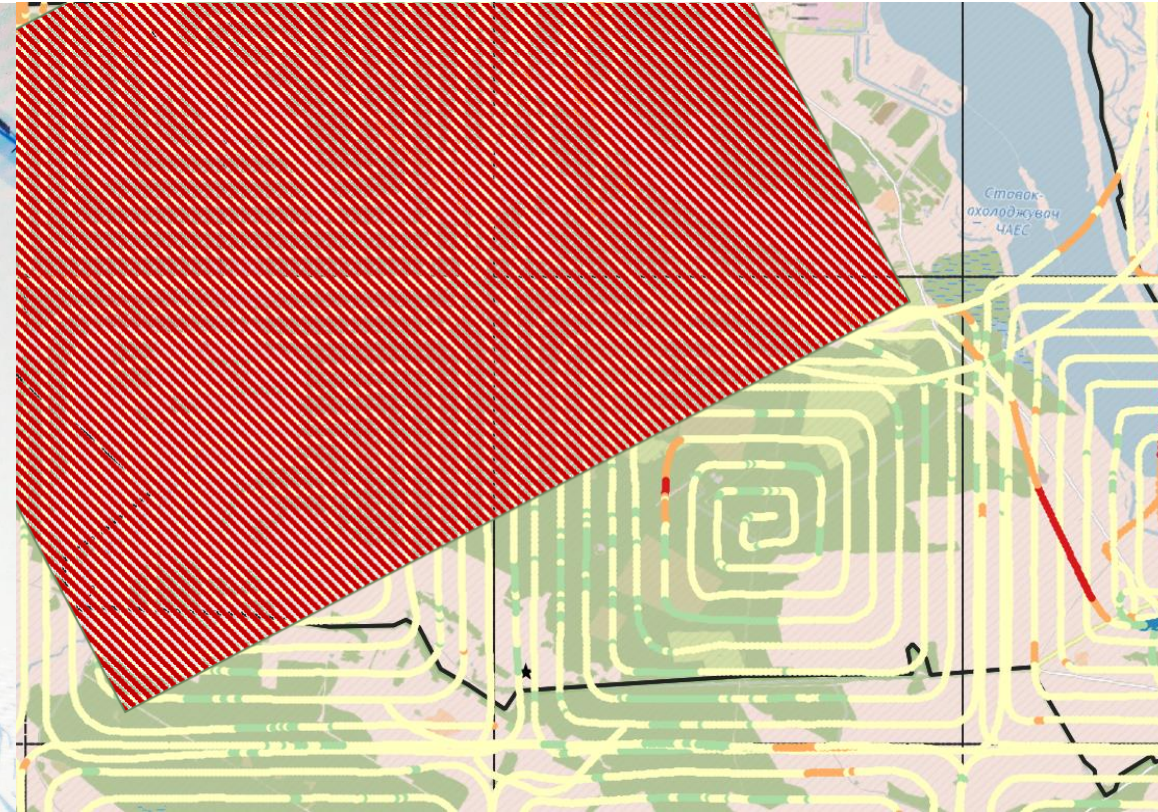



## Radioactive waste vector complex

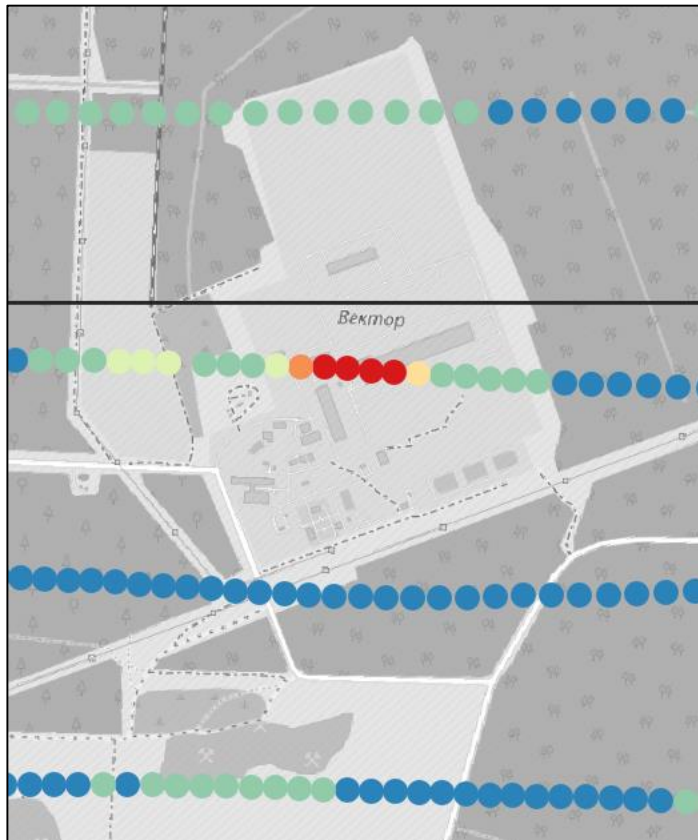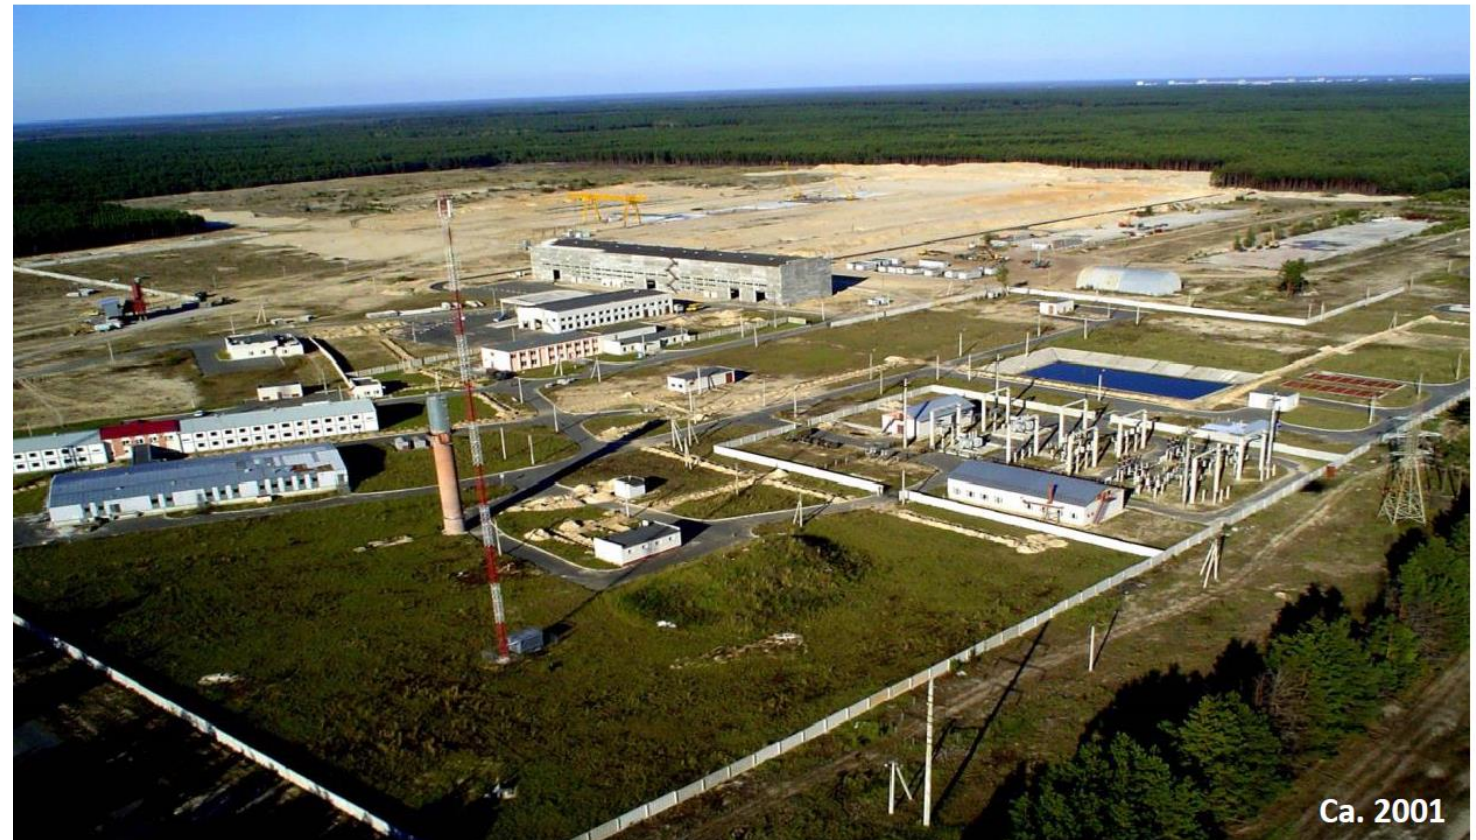

(Picture source: SAUEZM)



## Technical question

Is a return to the old home possible?

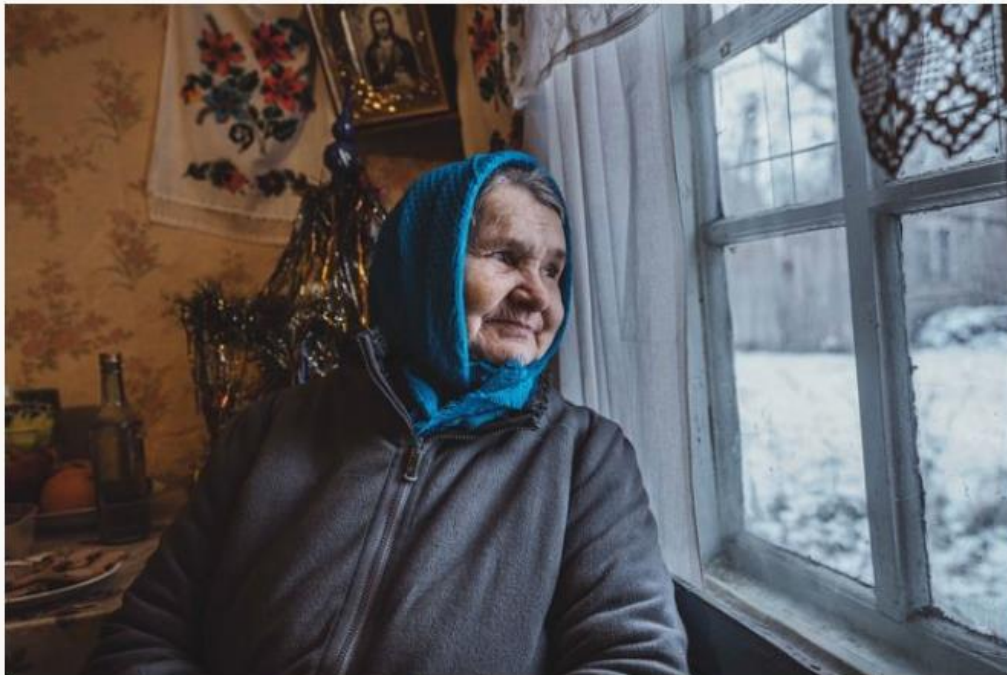

One of the residents still living in the Exclusion Zone after the Chernobyl disaster (Image: Mediadrumimages/RobynVonSwank)

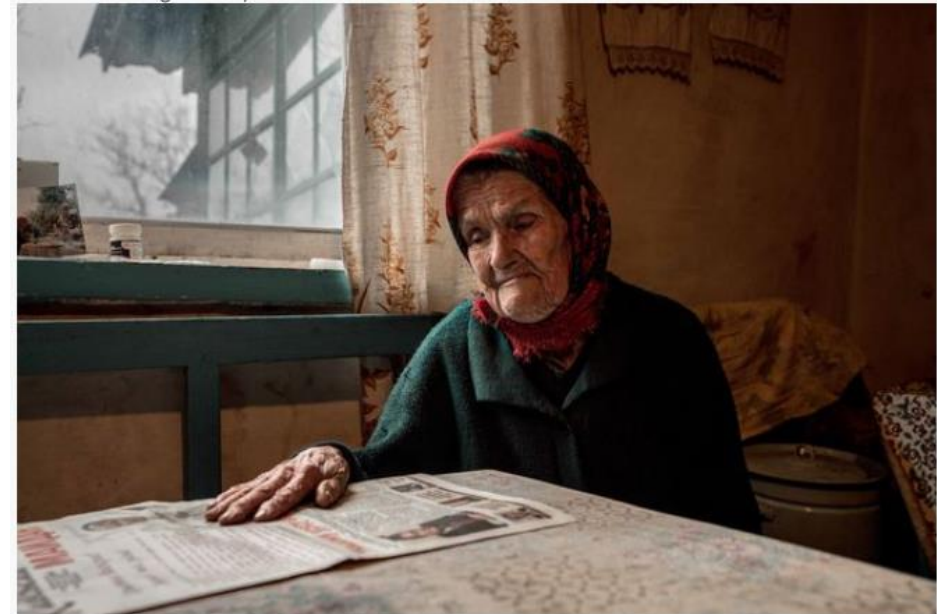

Several families have recently moved to cheap neighbourhoods near to Chernobyl despite the radiation warnings (Image: Mediadrumimages/RobynVonSwank)

## Technical question

### Radiation exposure of soldiers who stayed in the exclusion zone

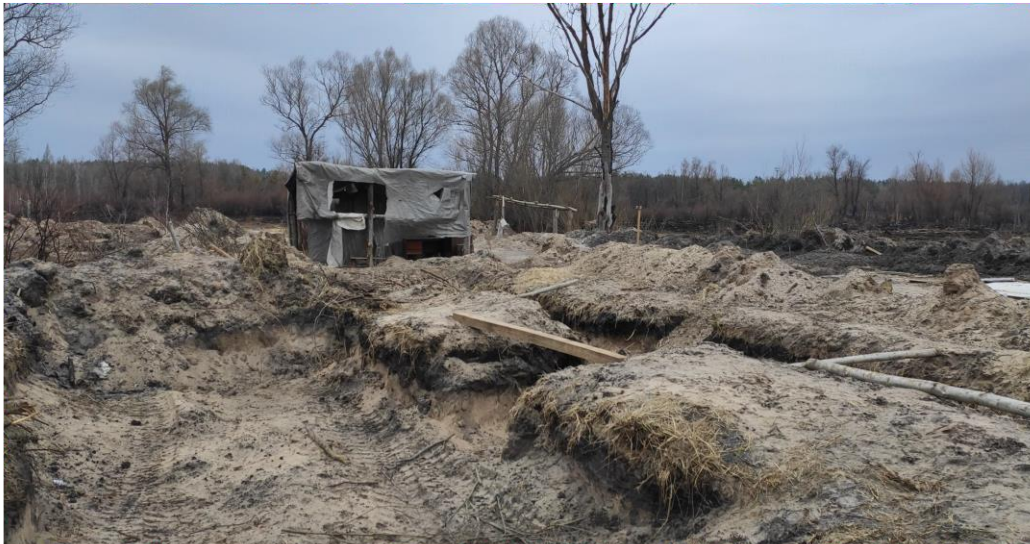

conservative estimation ~ **120 mSv**

#### Assumptions

**Period of stay** in the exclusion zone: **35 days** (24.02. – 31.03.2022)

#### **External exposure**

– Stay at the place maximum gamma ODL outdoors

**Inhalation** – No respiratory protection – increased breathing rate  
– permanent whirling up of dust

**Ingestion** – uncontaminated food

**Maximum ODL** – **Measurement campaign 2021** – 100  $\mu\text{Sv/h}$

**Ground contamination** – **Measurement campaign 2016** – Am-241 und Sr-90



## Resilience

### German Federal helicopter in Chernobyl

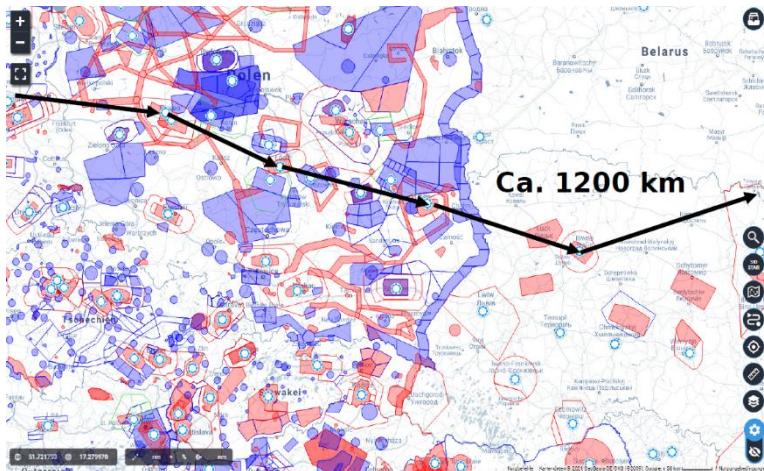

### Metrological challenge

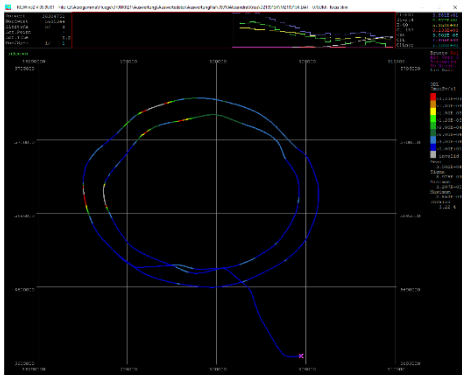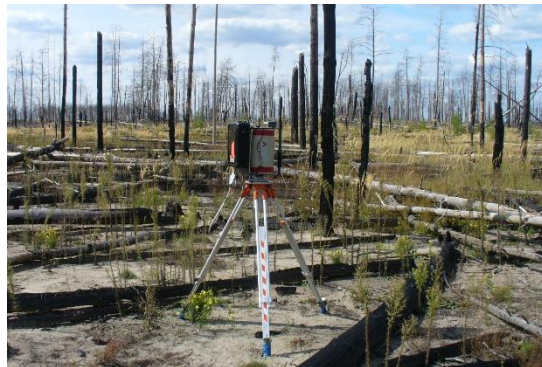

## Ukrainian-German cooperation

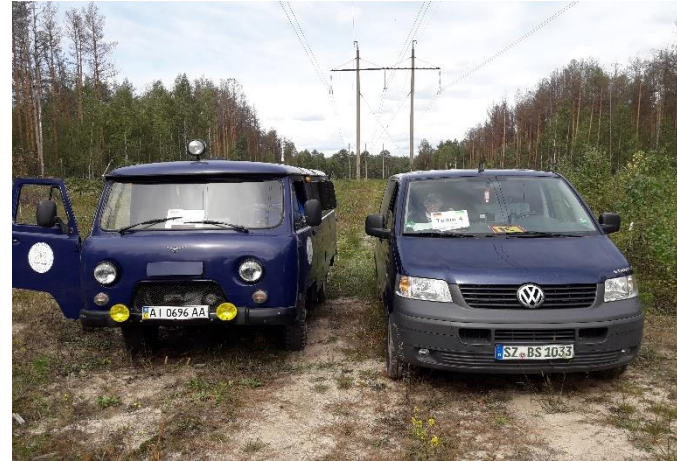

## Physical effort

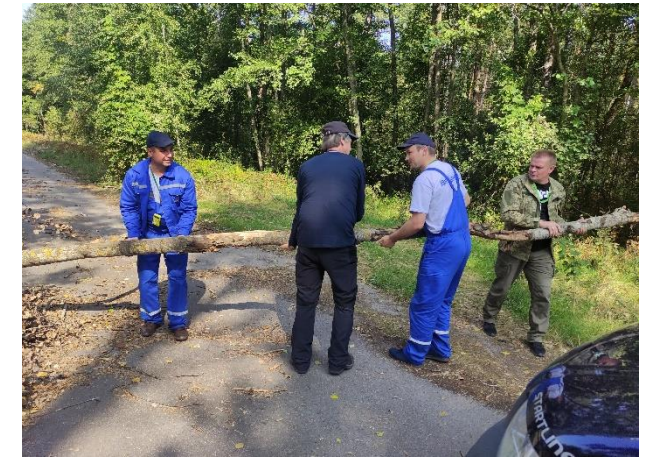

## Diplomatic entanglements

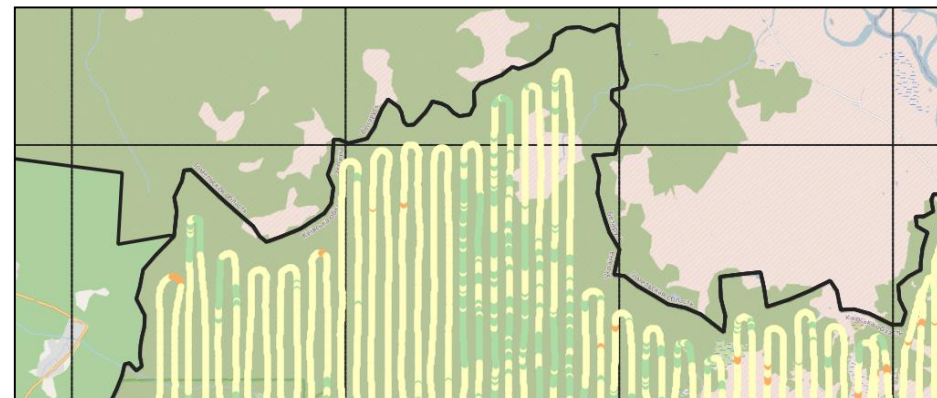

**BELARUS**  
-----  
**UKRAINE**

**Border**



**Bundesamt  
für Strahlenschutz**

#### **Legal Notice**

Bundesamt für Strahlenschutz  
Postfach 10 01 49  
38201 Salzgitter

Tel.: +49 30 18333-0  
Fax: +49 30 18333-1885  
E-Mail: [ePost@bfs.de](mailto:ePost@bfs.de)

[www.bfs.de](http://www.bfs.de)

#### **Contact for questions**

Christopher Strobl  
[cstrobl@bfs.de](mailto:cstrobl@bfs.de)  
Tel.: +49 3018 333 2510
